# Supplementary material for: Bioinformatics analysis identifies DYNC1I1 as prognosis marker in male patients with liver hepatocellular carcinoma
Source: PLoS One. 2021 Oct 22;16(10):e0258797. doi: 10.1371/journal.pone.0258797 (PMC8535175; doi:10.1371/journal.pone.0258797)
Supplement: S5 Table — (XLSX) [file pone.0258797.s005.xlsx]

## Sheet: string_interactions
#node1	node2	node1_string_id	node2_string_id	neighborhood_on_chromosome	gene_fusion	phylogenetic_cooccurrence	homology	coexpression	experimentally_determined_interaction	database_annotated	automated_textmining	combined_score
ACAN	COMP	9606.ENSP00000387356	9606.ENSP00000222271	0	0	0	0	0.081	0	0.9	0.814	0.981
ACAN	MMP13	9606.ENSP00000387356	9606.ENSP00000260302	0	0	0	0	0	0	0.9	0.874	0.986
ACAN	ADAMTS16	9606.ENSP00000387356	9606.ENSP00000274181	0	0	0	0	0	0	0.9	0.427	0.94
ACAN	HAPLN1	9606.ENSP00000387356	9606.ENSP00000274341	0	0	0	0.858	0.061	0.379	0.9	0.855	0.944
ACAN	ADAMTS18	9606.ENSP00000387356	9606.ENSP00000282849	0	0	0	0	0.049	0	0.9	0.31	0.928
ACAN	MMP1	9606.ENSP00000387356	9606.ENSP00000322788	0	0	0	0	0	0.379	0.9	0.705	0.98
ACAN	CHST6	9606.ENSP00000387356	9606.ENSP00000328983	0	0	0	0	0	0	0.9	0.054	0.901
ACAN	CHST5	9606.ENSP00000387356	9606.ENSP00000338783	0	0	0	0	0	0	0.9	0	0.9
ACAN	MMP9	9606.ENSP00000387356	9606.ENSP00000361405	0	0	0	0	0	0	0.9	0.646	0.963
ACAN	MMP12	9606.ENSP00000387356	9606.ENSP00000458585	0	0	0	0	0	0	0.9	0.426	0.94
ACTN2	MYH1	9606.ENSP00000443495	9606.ENSP00000226207	0	0	0	0	0.2	0.87	0	0.381	0.93
ACTN2	TNNC1	9606.ENSP00000443495	9606.ENSP00000232975	0	0	0	0	0.158	0.184	0.9	0.312	0.946
ACTN2	TNNT2	9606.ENSP00000443495	9606.ENSP00000236918	0	0	0	0	0.486	0.084	0.9	0.759	0.987
ACTN2	EGF	9606.ENSP00000443495	9606.ENSP00000265171	0	0	0	0	0.062	0	0.9	0.14	0.912
ACTN2	TNNT3	9606.ENSP00000443495	9606.ENSP00000278317	0	0	0	0	0.473	0.084	0.9	0.552	0.975
ACTN2	GRIA2	9606.ENSP00000443495	9606.ENSP00000296526	0	0	0	0	0.152	0.05	0.9	0.045	0.912
ACTN2	FIGF	9606.ENSP00000443495	9606.ENSP00000297904	0	0	0	0	0	0	0.9	0	0.9
ACTN2	TNNI3	9606.ENSP00000443495	9606.ENSP00000341838	0	0	0	0	0.192	0.082	0.9	0.6	0.966
ACTN2	MYBPC2	9606.ENSP00000443495	9606.ENSP00000350332	0	0	0	0	0.187	0.046	0.9	0.333	0.941
ACTN2	GRIN1	9606.ENSP00000443495	9606.ENSP00000360608	0	0	0	0	0.123	0.355	0.9	0.224	0.95
ACTN2	NPHS1	9606.ENSP00000443495	9606.ENSP00000368190	0	0	0	0	0.054	0.067	0.9	0.051	0.905
ACTN2	TNNI2	9606.ENSP00000443495	9606.ENSP00000371331	0	0	0	0	0.229	0.053	0.9	0.407	0.95
ACTN2	GRIN2A	9606.ENSP00000443495	9606.ENSP00000379818	0	0	0	0	0.126	0.079	0.9	0.161	0.923
ACTN2	MYBPC1	9606.ENSP00000443495	9606.ENSP00000400908	0	0	0	0	0.269	0	0.9	0.232	0.939
ACTN2	RASGRF1	9606.ENSP00000443495	9606.ENSP00000405963	0	0	0	0	0.098	0	0.9	0.063	0.908
ACTN2	NEFL	9606.ENSP00000443495	9606.ENSP00000482169	0	0	0	0	0.123	0.054	0.9	0	0.909
ACTN2	TNNT1	9606.ENSP00000443495	9606.ENSP00000467176	0	0	0	0	0.228	0.079	0.9	0.409	0.952
ACTN2	NEB	9606.ENSP00000443495	9606.ENSP00000484342	0	0	0	0	0.209	0.128	0.9	0.42	0.954
ADAM12	EGF	9606.ENSP00000357668	9606.ENSP00000265171	0	0	0	0	0.05	0.379	0.9	0.484	0.965
ADAM23	CACNG4	9606.ENSP00000264377	9606.ENSP00000262138	0	0	0	0	0.088	0	0.9	0.046	0.905
ADAM23	LGI3	9606.ENSP00000264377	9606.ENSP00000302297	0	0	0	0	0.111	0	0.9	0.682	0.969
ADAMTS16	SEMA5B	9606.ENSP00000274181	9606.ENSP00000389588	0	0	0	0.541	0.063	0	0.9	0	0.902
ADAMTS16	SBSPON	9606.ENSP00000274181	9606.ENSP00000297354	0	0	0	0	0.061	0	0.9	0	0.902
ADAMTS16	ADAMTS18	9606.ENSP00000274181	9606.ENSP00000282849	0	0	0	0.957	0.061	0	0.9	0.914	0.905
ADAMTS16	ADAMTS19	9606.ENSP00000274181	9606.ENSP00000274487	0	0	0	0.775	0.049	0	0.9	0.689	0.915
ADAMTS16	ADAMTS20	9606.ENSP00000274181	9606.ENSP00000374071	0	0	0	0.76	0.061	0	0.9	0.664	0.917
ADAMTS18	ADAMTS19	9606.ENSP00000282849	9606.ENSP00000274487	0	0	0	0.764	0.061	0	0.9	0.688	0.917
ADAMTS18	SBSPON	9606.ENSP00000282849	9606.ENSP00000297354	0	0	0	0	0.061	0	0.9	0	0.902
ADAMTS18	SEMA5B	9606.ENSP00000282849	9606.ENSP00000389588	0	0	0	0.541	0.084	0	0.9	0	0.904
ADAMTS18	ADAMTS20	9606.ENSP00000282849	9606.ENSP00000374071	0	0	0	0.771	0.061	0	0.9	0.613	0.915
ADAMTS19	SBSPON	9606.ENSP00000274487	9606.ENSP00000297354	0	0	0	0	0	0	0.9	0	0.9
ADAMTS19	SEMA5B	9606.ENSP00000274487	9606.ENSP00000389588	0	0	0	0.54	0.076	0	0.9	0	0.903
ADAMTS19	ADAMTS20	9606.ENSP00000274487	9606.ENSP00000374071	0	0	0	0.721	0.112	0	0.9	0.622	0.923
ADAMTS20	SBSPON	9606.ENSP00000374071	9606.ENSP00000297354	0	0	0	0	0.061	0	0.9	0	0.902
ADAMTS20	SEMA5B	9606.ENSP00000374071	9606.ENSP00000389588	0	0	0	0.542	0.086	0	0.9	0	0.904
ADCY8	DRD4	9606.ENSP00000286355	9606.ENSP00000176183	0	0	0	0	0.063	0.06	0.9	0.389	0.938
ADCY8	BDKRB1	9606.ENSP00000286355	9606.ENSP00000216629	0	0	0	0	0.063	0.06	0.9	0	0.904
ADCY8	GNGT1	9606.ENSP00000286355	9606.ENSP00000248572	0	0	0	0	0	0	0.9	0.049	0.9
ADCY8	MTNR1B	9606.ENSP00000286355	9606.ENSP00000257068	0	0	0	0	0.063	0.06	0.9	0.098	0.909
ADCY8	GABBR2	9606.ENSP00000286355	9606.ENSP00000259455	0	0	0	0	0.151	0	0.9	0.113	0.918
ADCY8	OPRK1	9606.ENSP00000286355	9606.ENSP00000265572	0	0	0	0	0.063	0.06	0.9	0.237	0.923
ADCY8	GAL	9606.ENSP00000286355	9606.ENSP00000265643	0	0	0	0	0	0	0.9	0.064	0.902
ADCY8	PTH2R	9606.ENSP00000286355	9606.ENSP00000272847	0	0	0	0	0.061	0.092	0.9	0.166	0.919
ADCY8	CRH	9606.ENSP00000286355	9606.ENSP00000276571	0	0	0	0	0.089	0	0.9	0.14	0.914
ADCY8	CCL25	9606.ENSP00000286355	9606.ENSP00000375086	0	0	0	0	0	0	0.9	0	0.9
ADCY8	ADM2	9606.ENSP00000286355	9606.ENSP00000379087	0	0	0	0	0	0	0.9	0	0.9
ADCY8	CXCL5	9606.ENSP00000286355	9606.ENSP00000296027	0	0	0	0	0	0	0.9	0	0.9
ADCY8	RLN3	9606.ENSP00000286355	9606.ENSP00000397415	0	0	0	0	0	0	0.9	0	0.9
ADCY8	P2RY4	9606.ENSP00000286355	9606.ENSP00000363643	0	0	0	0	0	0	0.9	0.057	0.901
ADCY8	PPY	9606.ENSP00000286355	9606.ENSP00000466009	0	0	0	0	0	0	0.9	0.069	0.902
ADCY8	RXFP4	9606.ENSP00000286355	9606.ENSP00000357301	0	0	0	0	0.063	0.06	0.9	0	0.904
ADCY8	HCAR1	9606.ENSP00000286355	9606.ENSP00000389255	0	0	0	0	0.063	0.06	0.9	0	0.904
ADCY8	SSTR5	9606.ENSP00000286355	9606.ENSP00000293897	0	0	0	0	0.063	0.06	0.9	0.049	0.905
ADCY8	GIP	9606.ENSP00000286355	9606.ENSP00000350005	0	0	0	0	0	0	0.9	0.096	0.905
ADCY8	APLN	9606.ENSP00000286355	9606.ENSP00000391800	0	0	0	0	0.098	0	0.9	0	0.905
ADCY8	AGTR2	9606.ENSP00000286355	9606.ENSP00000360973	0	0	0	0	0.063	0.06	0.9	0.05	0.905
ADCY8	LPAR3	9606.ENSP00000286355	9606.ENSP00000395389	0	0	0	0	0.063	0.06	0.9	0.067	0.906
ADCY8	CCR3	9606.ENSP00000286355	9606.ENSP00000441600	0	0	0	0	0.063	0.06	0.9	0.064	0.906
ADCY8	GHRHR	9606.ENSP00000286355	9606.ENSP00000320180	0	0	0	0	0.076	0.092	0.9	0.05	0.909
ADCY8	HTR1D	9606.ENSP00000286355	9606.ENSP00000363748	0	0	0	0	0.063	0.06	0.9	0.111	0.911
ADCY8	CALCA	9606.ENSP00000286355	9606.ENSP00000331746	0	0	0	0	0	0	0.9	0.158	0.912
ADCY8	HTR1F	9606.ENSP00000286355	9606.ENSP00000322924	0	0	0	0	0.063	0.06	0.9	0.145	0.914
ADCY8	HTR1B	9606.ENSP00000286355	9606.ENSP00000358963	0	0	0	0	0.092	0.06	0.9	0.113	0.914
ADCY8	GRM4	9606.ENSP00000286355	9606.ENSP00000440556	0	0	0	0	0.128	0	0.9	0.111	0.915
ADCY8	SSTR3	9606.ENSP00000286355	9606.ENSP00000480971	0	0	0	0	0.086	0.06	0.9	0.145	0.916
ADCY8	SST	9606.ENSP00000286355	9606.ENSP00000287641	0	0	0	0	0.099	0	0.9	0.161	0.917
ADCY8	GNG4	9606.ENSP00000286355	9606.ENSP00000375727	0	0	0	0	0.086	0	0.9	0.202	0.92
ADCY8	GLP1R	9606.ENSP00000286355	9606.ENSP00000362353	0	0	0	0	0	0.092	0.9	0.238	0.924
ADCY8	ADRA2C	9606.ENSP00000286355	9606.ENSP00000386069	0	0	0	0	0.082	0.06	0.9	0.267	0.928
ADCY8	CNR1	9606.ENSP00000286355	9606.ENSP00000358513	0	0	0	0	0.155	0.06	0.9	0.22	0.929
ADCY8	CRHR1	9606.ENSP00000286355	9606.ENSP00000381333	0	0	0	0	0.211	0.092	0.9	0.162	0.932
ADCY8	GNAZ	9606.ENSP00000286355	9606.ENSP00000478892	0	0	0	0	0.096	0.184	0.9	0.293	0.94
ADCY8	GCG	9606.ENSP00000286355	9606.ENSP00000387662	0	0	0	0	0	0	0.9	0.451	0.942
ADIPOQ	FABP4	9606.ENSP00000389814	9606.ENSP00000256104	0	0	0	0	0.186	0	0.9	0.879	0.989
ADIPOQ	CDH13	9606.ENSP00000389814	9606.ENSP00000268613	0	0	0	0	0.064	0.472	0	0.833	0.91
ADIPOQ	LEP	9606.ENSP00000389814	9606.ENSP00000312652	0	0	0	0	0.149	0	0	0.971	0.975
ADIPOQ	EBF1	9606.ENSP00000389814	9606.ENSP00000322898	0	0	0	0	0.051	0	0.9	0.195	0.916
ADM2	GNGT1	9606.ENSP00000379087	9606.ENSP00000248572	0	0	0	0	0	0	0.9	0	0.9
ADM2	PTH2R	9606.ENSP00000379087	9606.ENSP00000272847	0	0	0	0	0	0	0.9	0.167	0.913
ADM2	CRH	9606.ENSP00000379087	9606.ENSP00000276571	0	0	0	0	0	0	0.9	0.142	0.91
ADM2	GHRHR	9606.ENSP00000379087	9606.ENSP00000320180	0	0	0	0	0	0	0.9	0.045	0.9
ADM2	CALCA	9606.ENSP00000379087	9606.ENSP00000331746	0	0	0	0	0	0	0.9	0.733	0.972
ADM2	GIP	9606.ENSP00000379087	9606.ENSP00000350005	0	0	0	0	0	0	0.9	0	0.9
ADM2	GLP1R	9606.ENSP00000379087	9606.ENSP00000362353	0	0	0	0	0	0	0.9	0.102	0.906
ADM2	GNG4	9606.ENSP00000379087	9606.ENSP00000375727	0	0	0	0	0	0	0.9	0	0.9
ADM2	CRHR1	9606.ENSP00000379087	9606.ENSP00000381333	0	0	0	0	0	0	0.9	0.088	0.904
ADM2	RLN3	9606.ENSP00000379087	9606.ENSP00000397415	0	0	0	0	0.061	0	0.9	0.134	0.911
ADM2	GCG	9606.ENSP00000379087	9606.ENSP00000387662	0	0	0	0	0	0	0.9	0.172	0.913
ADRA1D	BDKRB1	9606.ENSP00000368766	9606.ENSP00000216629	0	0	0	0.581	0	0	0.9	0	0.9
ADRA1D	KISS1R	9606.ENSP00000368766	9606.ENSP00000234371	0	0	0	0.641	0.061	0	0.9	0	0.902
ADRA1D	F2RL3	9606.ENSP00000368766	9606.ENSP00000248076	0	0	0	0	0	0	0.9	0	0.9
ADRA1D	GNGT1	9606.ENSP00000368766	9606.ENSP00000248572	0	0	0	0	0	0.165	0.9	0.068	0.915
ADRA1D	NTS	9606.ENSP00000368766	9606.ENSP00000256010	0	0	0	0	0	0.263	0.9	0.348	0.947
ADRA1D	GRP	9606.ENSP00000368766	9606.ENSP00000256857	0	0	0	0	0.061	0	0.9	0.213	0.919
ADRA1D	PROK1	9606.ENSP00000368766	9606.ENSP00000271331	0	0	0	0	0	0	0.9	0	0.9
ADRA1D	HTR2C	9606.ENSP00000368766	9606.ENSP00000276198	0	0	0	0.73	0.061	0	0.9	0.634	0.918
ADRA1D	TACR1	9606.ENSP00000368766	9606.ENSP00000303522	0	0	0	0.631	0	0	0.9	0.416	0.914
ADRA1D	NTSR2	9606.ENSP00000368766	9606.ENSP00000303686	0	0	0	0.565	0.079	0	0.9	0.212	0.911
ADRA1D	GRM5	9606.ENSP00000368766	9606.ENSP00000306138	0	0	0	0	0.064	0.057	0.9	0.297	0.929
ADRA1D	CHRM1	9606.ENSP00000368766	9606.ENSP00000306490	0	0	0	0.683	0.079	0	0.9	0.437	0.916
ADRA1D	NPFFR2	9606.ENSP00000368766	9606.ENSP00000307822	0	0	0	0.614	0	0	0.9	0.153	0.904
ADRA1D	GPRC6A	9606.ENSP00000368766	9606.ENSP00000309493	0	0	0	0	0	0.057	0.9	0	0.901
ADRA1D	UTS2R	9606.ENSP00000368766	9606.ENSP00000323516	0	0	0	0.595	0.063	0	0.9	0.469	0.919
ADRA1D	GAST	9606.ENSP00000368766	9606.ENSP00000331358	0	0	0	0	0	0	0.9	0.21	0.917
ADRA1D	CCKBR	9606.ENSP00000368766	9606.ENSP00000335544	0	0	0	0.631	0.061	0	0.9	0.321	0.912
ADRA1D	EDN3	9606.ENSP00000368766	9606.ENSP00000337128	0	0	0	0	0	0.157	0.9	0.379	0.943
ADRA1D	BRS3	9606.ENSP00000368766	9606.ENSP00000359682	0	0	0	0.605	0	0	0.9	0.194	0.906
ADRA1D	PTGFR	9606.ENSP00000368766	9606.ENSP00000359793	0	0	0	0	0.069	0	0.9	0.191	0.918
ADRA1D	OPN4	9606.ENSP00000368766	9606.ENSP00000361141	0	0	0	0.599	0	0	0.9	0.141	0.904
ADRA1D	MLN	9606.ENSP00000368766	9606.ENSP00000388825	0	0	0	0	0	0	0.9	0	0.9
ADRA1D	LPAR4	9606.ENSP00000368766	9606.ENSP00000408205	0	0	0	0.587	0	0	0.9	0.05	0.9
ADRA1D	QRFPR	9606.ENSP00000368766	9606.ENSP00000377948	0	0	0	0.624	0	0	0.9	0.041	0.9
ADRA1D	LPAR3	9606.ENSP00000368766	9606.ENSP00000395389	0	0	0	0.608	0.055	0	0.9	0.069	0.902
ADRA1D	GRPR	9606.ENSP00000368766	9606.ENSP00000369643	0	0	0	0.594	0	0	0.9	0.142	0.904
ADRA1D	NMB	9606.ENSP00000368766	9606.ENSP00000378089	0	0	0	0	0	0	0.9	0.08	0.904
ADRA1D	TAC3	9606.ENSP00000368766	9606.ENSP00000483110	0	0	0	0	0.061	0	0.9	0.116	0.909
ADRA1D	GNG4	9606.ENSP00000368766	9606.ENSP00000375727	0	0	0	0	0	0.165	0.9	0.106	0.918
ADRA1D	GCG	9606.ENSP00000368766	9606.ENSP00000387662	0	0	0	0	0	0	0.9	0.478	0.945
ADRA2C	DRD4	9606.ENSP00000386069	9606.ENSP00000176183	0	0	0	0.794	0	0	0.9	0.732	0.914
ADRA2C	BDKRB1	9606.ENSP00000386069	9606.ENSP00000216629	0	0	0	0.572	0	0	0.9	0	0.9
ADRA2C	GNGT1	9606.ENSP00000386069	9606.ENSP00000248572	0	0	0	0	0	0.165	0.9	0	0.912
ADRA2C	MTNR1B	9606.ENSP00000386069	9606.ENSP00000257068	0	0	0	0.597	0	0	0.9	0.274	0.909
ADRA2C	GABBR2	9606.ENSP00000386069	9606.ENSP00000259455	0	0	0	0	0.064	0	0.9	0.306	0.929
ADRA2C	OPRK1	9606.ENSP00000386069	9606.ENSP00000265572	0	0	0	0.62	0.062	0	0.9	0.704	0.927
ADRA2C	GAL	9606.ENSP00000386069	9606.ENSP00000265643	0	0	0	0	0.098	0	0.9	0.399	0.941
ADRA2C	SST	9606.ENSP00000386069	9606.ENSP00000287641	0	0	0	0	0.064	0	0.9	0.44	0.943
ADRA2C	SSTR5	9606.ENSP00000386069	9606.ENSP00000293897	0	0	0	0.623	0.084	0	0.9	0.34	0.915
ADRA2C	CXCL5	9606.ENSP00000386069	9606.ENSP00000296027	0	0	0	0	0	0	0.9	0.052	0.901
ADRA2C	HTR1F	9606.ENSP00000386069	9606.ENSP00000322924	0	0	0	0.823	0.062	0	0.9	0.419	0.909
ADRA2C	RXFP4	9606.ENSP00000386069	9606.ENSP00000357301	0	0	0	0.568	0	0	0.9	0.054	0.9
ADRA2C	CNR1	9606.ENSP00000386069	9606.ENSP00000358513	0	0	0	0	0.063	0	0.9	0.618	0.961
ADRA2C	HTR1B	9606.ENSP00000386069	9606.ENSP00000358963	0	0	0	0.819	0.063	0	0.9	0.669	0.913
ADRA2C	AGTR2	9606.ENSP00000386069	9606.ENSP00000360973	0	0	0	0	0	0	0.9	0.444	0.942
ADRA2C	P2RY4	9606.ENSP00000386069	9606.ENSP00000363643	0	0	0	0	0	0	0.9	0.171	0.913
ADRA2C	HTR1D	9606.ENSP00000386069	9606.ENSP00000363748	0	0	0	0.85	0.062	0	0.9	0.554	0.91
ADRA2C	CCL25	9606.ENSP00000386069	9606.ENSP00000375086	0	0	0	0	0	0.05	0.9	0	0.9
ADRA2C	GNG4	9606.ENSP00000386069	9606.ENSP00000375727	0	0	0	0	0.062	0.165	0.9	0	0.914
ADRA2C	CCR3	9606.ENSP00000386069	9606.ENSP00000441600	0	0	0	0.567	0	0	0.9	0	0.9
ADRA2C	RLN3	9606.ENSP00000386069	9606.ENSP00000397415	0	0	0	0	0	0	0.9	0	0.9
ADRA2C	APLN	9606.ENSP00000386069	9606.ENSP00000391800	0	0	0	0	0	0	0.9	0.069	0.902
ADRA2C	LPAR3	9606.ENSP00000386069	9606.ENSP00000395389	0	0	0	0	0	0	0.9	0.073	0.903
ADRA2C	HCAR1	9606.ENSP00000386069	9606.ENSP00000389255	0	0	0	0	0.062	0	0.9	0.057	0.903
ADRA2C	PPY	9606.ENSP00000386069	9606.ENSP00000466009	0	0	0	0	0	0	0.9	0.148	0.911
ADRA2C	SSTR3	9606.ENSP00000386069	9606.ENSP00000480971	0	0	0	0.598	0.063	0	0.9	0.353	0.915
ADRA2C	GNAZ	9606.ENSP00000386069	9606.ENSP00000478892	0	0	0	0	0.063	0.178	0.9	0	0.916
ADRA2C	GRM4	9606.ENSP00000386069	9606.ENSP00000440556	0	0	0	0	0.064	0.057	0.9	0.213	0.921
AFP	TMEM132A	9606.ENSP00000379138	9606.ENSP00000005286	0	0	0	0	0	0	0.9	0	0.9
AFP	BPIFB2	9606.ENSP00000379138	9606.ENSP00000170150	0	0	0	0	0.53	0	0.9	0	0.951
AFP	SCG3	9606.ENSP00000379138	9606.ENSP00000220478	0	0	0	0	0.088	0	0.9	0	0.904
AFP	VGF	9606.ENSP00000379138	9606.ENSP00000249330	0	0	0	0	0	0	0.9	0.071	0.903
AFP	STC2	9606.ENSP00000379138	9606.ENSP00000265087	0	0	0	0	0.141	0	0.9	0.093	0.915
AFP	SCG2	9606.ENSP00000379138	9606.ENSP00000304133	0	0	0	0	0.062	0	0.9	0	0.902
AFP	AMBN	9606.ENSP00000379138	9606.ENSP00000313809	0	0	0	0	0.065	0	0.9	0	0.902
AFP	CHGB	9606.ENSP00000379138	9606.ENSP00000368244	0	0	0	0	0	0	0.9	0	0.9
AFP	MSLN	9606.ENSP00000379138	9606.ENSP00000372313	0	0	0	0	0	0	0.9	0.268	0.923
AFP	GPC3	9606.ENSP00000379138	9606.ENSP00000377836	0	0	0	0	0.556	0	0.9	0.792	0.989
AFP	SPP1	9606.ENSP00000379138	9606.ENSP00000378517	0	0	0	0	0.078	0	0.9	0.481	0.948
AFP	MEPE	9606.ENSP00000379138	9606.ENSP00000416984	0	0	0	0	0	0	0.9	0	0.9
AFP	SPARCL1	9606.ENSP00000379138	9606.ENSP00000414856	0	0	0	0	0	0	0.9	0.055	0.901
AFP	MATN3	9606.ENSP00000379138	9606.ENSP00000383894	0	0	0	0	0.161	0	0.9	0	0.912
AFP	NOTUM	9606.ENSP00000379138	9606.ENSP00000387310	0	0	0	0	0.257	0	0.9	0.118	0.928
AGTR2	DRD4	9606.ENSP00000360973	9606.ENSP00000176183	0	0	0	0	0	0	0.9	0.211	0.917
AGTR2	BDKRB1	9606.ENSP00000360973	9606.ENSP00000216629	0	0	0	0.787	0.061	0	0.9	0.321	0.908
AGTR2	KISS1R	9606.ENSP00000360973	9606.ENSP00000234371	0	0	0	0.675	0	0	0.9	0	0.9
AGTR2	F2RL3	9606.ENSP00000360973	9606.ENSP00000248076	0	0	0	0.639	0	0	0.9	0.107	0.902
AGTR2	GNGT1	9606.ENSP00000360973	9606.ENSP00000248572	0	0	0	0	0	0.165	0.9	0	0.912
AGTR2	NTS	9606.ENSP00000360973	9606.ENSP00000256010	0	0	0	0	0.061	0.263	0.9	0.222	0.938
AGTR2	GRP	9606.ENSP00000360973	9606.ENSP00000256857	0	0	0	0	0	0	0.9	0.069	0.902
AGTR2	MTNR1B	9606.ENSP00000360973	9606.ENSP00000257068	0	0	0	0.585	0	0	0.9	0.069	0.901
AGTR2	GABBR2	9606.ENSP00000360973	9606.ENSP00000259455	0	0	0	0	0	0	0.9	0	0.9
AGTR2	OPRK1	9606.ENSP00000360973	9606.ENSP00000265572	0	0	0	0.749	0	0	0.9	0.186	0.903
AGTR2	GAL	9606.ENSP00000360973	9606.ENSP00000265643	0	0	0	0	0	0	0.9	0.086	0.904
AGTR2	PROK1	9606.ENSP00000360973	9606.ENSP00000271331	0	0	0	0	0	0	0.9	0	0.9
AGTR2	HTR2C	9606.ENSP00000360973	9606.ENSP00000276198	0	0	0	0.572	0	0	0.9	0.158	0.905
AGTR2	SST	9606.ENSP00000360973	9606.ENSP00000287641	0	0	0	0	0	0	0.9	0.222	0.918
AGTR2	SSTR5	9606.ENSP00000360973	9606.ENSP00000293897	0	0	0	0.744	0	0	0.9	0.073	0.9
AGTR2	CXCL5	9606.ENSP00000360973	9606.ENSP00000296027	0	0	0	0	0	0	0.9	0	0.9
AGTR2	NTSR2	9606.ENSP00000360973	9606.ENSP00000303686	0	0	0	0	0	0	0.9	0.079	0.903
AGTR2	CHRM1	9606.ENSP00000360973	9606.ENSP00000306490	0	0	0	0	0.062	0	0.9	0.08	0.906
AGTR2	HTR1F	9606.ENSP00000360973	9606.ENSP00000322924	0	0	0	0.589	0	0	0.9	0.162	0.905
AGTR2	UTS2R	9606.ENSP00000360973	9606.ENSP00000323516	0	0	0	0.636	0	0	0.9	0.131	0.903
AGTR2	CCKBR	9606.ENSP00000360973	9606.ENSP00000335544	0	0	0	0.59	0	0	0.9	0.068	0.901
AGTR2	EDN3	9606.ENSP00000360973	9606.ENSP00000337128	0	0	0	0	0	0.157	0.9	0.348	0.94
AGTR2	RXFP4	9606.ENSP00000360973	9606.ENSP00000357301	0	0	0	0.714	0	0	0.9	0.171	0.903
AGTR2	CNR1	9606.ENSP00000360973	9606.ENSP00000358513	0	0	0	0	0.061	0	0.9	0.25	0.923
AGTR2	HTR1B	9606.ENSP00000360973	9606.ENSP00000358963	0	0	0	0.587	0	0	0.9	0.113	0.903
AGTR2	BRS3	9606.ENSP00000360973	9606.ENSP00000359682	0	0	0	0.68	0	0	0.9	0.102	0.902
AGTR2	CCL25	9606.ENSP00000360973	9606.ENSP00000375086	0	0	0	0	0	0.05	0.9	0	0.9
AGTR2	CCR3	9606.ENSP00000360973	9606.ENSP00000441600	0	0	0	0.772	0	0	0.9	0.056	0.9
AGTR2	NMB	9606.ENSP00000360973	9606.ENSP00000378089	0	0	0	0	0	0	0.9	0	0.9
AGTR2	MLN	9606.ENSP00000360973	9606.ENSP00000388825	0	0	0	0	0	0	0.9	0.041	0.9
AGTR2	P2RY4	9606.ENSP00000360973	9606.ENSP00000363643	0	0	0	0.698	0	0	0.9	0	0.9
AGTR2	PPY	9606.ENSP00000360973	9606.ENSP00000466009	0	0	0	0	0	0	0.9	0.041	0.9
AGTR2	HCAR1	9606.ENSP00000360973	9606.ENSP00000389255	0	0	0	0.641	0	0	0.9	0.049	0.9
AGTR2	HTR1D	9606.ENSP00000360973	9606.ENSP00000363748	0	0	0	0.587	0	0	0.9	0.079	0.901
AGTR2	SSTR3	9606.ENSP00000360973	9606.ENSP00000480971	0	0	0	0.762	0	0	0.9	0.106	0.901
AGTR2	GRM4	9606.ENSP00000360973	9606.ENSP00000440556	0	0	0	0	0	0.057	0.9	0.056	0.903
AGTR2	GRPR	9606.ENSP00000360973	9606.ENSP00000369643	0	0	0	0.679	0	0	0.9	0.175	0.904
AGTR2	LPAR3	9606.ENSP00000360973	9606.ENSP00000395389	0	0	0	0	0	0	0.9	0.111	0.907
AGTR2	RLN3	9606.ENSP00000360973	9606.ENSP00000397415	0	0	0	0	0	0	0.9	0.116	0.907
AGTR2	GNG4	9606.ENSP00000360973	9606.ENSP00000375727	0	0	0	0	0	0.165	0.9	0	0.912
AGTR2	APLN	9606.ENSP00000360973	9606.ENSP00000391800	0	0	0	0	0	0	0.9	0.249	0.921
AKR1B10	RBP2	9606.ENSP00000352584	9606.ENSP00000232217	0	0	0	0	0.067	0.048	0.9	0.061	0.905
ALDH3A1	GAD1	9606.ENSP00000411821	9606.ENSP00000350928	0	0	0	0	0.064	0.084	0.9	0.134	0.915
ALDH3A1	GAD2	9606.ENSP00000411821	9606.ENSP00000365437	0	0	0	0	0.064	0.084	0.9	0.084	0.91
ALDH3B2	GAD1	9606.ENSP00000255084	9606.ENSP00000350928	0	0	0	0	0.064	0.084	0.9	0.084	0.91
ALDH3B2	GAD2	9606.ENSP00000255084	9606.ENSP00000365437	0	0	0	0	0.064	0.084	0.9	0.084	0.91
ALOX15B	CYP4F8	9606.ENSP00000369530	9606.ENSP00000477567	0	0	0	0	0.061	0	0.9	0.088	0.906
ALPI	PRSS21	9606.ENSP00000295463	9606.ENSP00000005995	0	0	0	0	0.09	0	0.9	0.05	0.906
ALPI	CEACAM7	9606.ENSP00000295463	9606.ENSP00000006724	0	0	0	0	0	0	0.9	0.062	0.902
ALPI	THY1	9606.ENSP00000295463	9606.ENSP00000284240	0	0	0	0	0	0	0.9	0.243	0.921
ALPI	CD109	9606.ENSP00000295463	9606.ENSP00000287097	0	0	0	0	0	0	0.9	0.043	0.9
ALPI	LY6K	9606.ENSP00000295463	9606.ENSP00000292430	0	0	0	0	0	0	0.9	0	0.9
ALPI	ALPPL2	9606.ENSP00000295463	9606.ENSP00000295453	0	0	0.449	0.983	0	0.691	0.9	0.622	0.968
ALPI	LY6H	9606.ENSP00000295463	9606.ENSP00000399485	0	0	0	0	0	0	0.9	0	0.9
ALPI	LYPD1	9606.ENSP00000295463	9606.ENSP00000380605	0	0	0	0	0	0	0.9	0	0.9
ALPI	PRND	9606.ENSP00000295463	9606.ENSP00000306900	0	0	0	0	0	0	0.9	0	0.9
ALPI	MDGA2	9606.ENSP00000295463	9606.ENSP00000382178	0	0	0	0	0	0	0.9	0	0.9
ALPI	MDGA1	9606.ENSP00000295463	9606.ENSP00000402584	0	0	0	0	0	0	0.9	0.055	0.901
ALPI	PSCA	9606.ENSP00000295463	9606.ENSP00000301258	0	0	0	0	0	0	0.9	0.066	0.902
ALPI	NTM	9606.ENSP00000295463	9606.ENSP00000396722	0	0	0	0	0	0	0.9	0.069	0.902
ALPI	MSLN	9606.ENSP00000295463	9606.ENSP00000372313	0	0	0	0	0.065	0	0.9	0.049	0.903
ALPI	GP2	9606.ENSP00000295463	9606.ENSP00000370767	0	0	0	0	0	0	0.9	0.086	0.904
ALPI	LYPD8	9606.ENSP00000295463	9606.ENSP00000466070	0	0	0	0	0.113	0	0.9	0	0.907
ALPPL2	PRSS21	9606.ENSP00000295453	9606.ENSP00000005995	0	0	0	0	0.063	0	0.9	0.05	0.903
ALPPL2	CEACAM7	9606.ENSP00000295453	9606.ENSP00000006724	0	0	0	0	0	0	0.9	0.062	0.902
ALPPL2	THY1	9606.ENSP00000295453	9606.ENSP00000284240	0	0	0	0	0	0	0.9	0.254	0.922
ALPPL2	CD109	9606.ENSP00000295453	9606.ENSP00000287097	0	0	0	0	0	0	0.9	0.043	0.9
ALPPL2	LY6K	9606.ENSP00000295453	9606.ENSP00000292430	0	0	0	0	0	0	0.9	0	0.9
ALPPL2	LY6H	9606.ENSP00000295453	9606.ENSP00000399485	0	0	0	0	0	0	0.9	0	0.9
ALPPL2	LYPD1	9606.ENSP00000295453	9606.ENSP00000380605	0	0	0	0	0	0	0.9	0	0.9
ALPPL2	PRND	9606.ENSP00000295453	9606.ENSP00000306900	0	0	0	0	0	0	0.9	0	0.9
ALPPL2	MDGA2	9606.ENSP00000295453	9606.ENSP00000382178	0	0	0	0	0	0	0.9	0	0.9
ALPPL2	PSCA	9606.ENSP00000295453	9606.ENSP00000301258	0	0	0	0	0	0	0.9	0.058	0.901
ALPPL2	MDGA1	9606.ENSP00000295453	9606.ENSP00000402584	0	0	0	0	0	0	0.9	0.055	0.901
ALPPL2	LYPD8	9606.ENSP00000295453	9606.ENSP00000466070	0	0	0	0	0.061	0	0.9	0	0.902
ALPPL2	NTM	9606.ENSP00000295453	9606.ENSP00000396722	0	0	0	0	0	0	0.9	0.069	0.902
ALPPL2	GP2	9606.ENSP00000295453	9606.ENSP00000370767	0	0	0	0	0	0	0.9	0.071	0.903
ALPPL2	MSLN	9606.ENSP00000295453	9606.ENSP00000372313	0	0	0	0	0.065	0	0.9	0.049	0.903
AMBN	TMEM132A	9606.ENSP00000313809	9606.ENSP00000005286	0	0	0	0	0	0	0.9	0	0.9
AMBN	BPIFB2	9606.ENSP00000313809	9606.ENSP00000170150	0	0	0	0	0.07	0	0.9	0	0.903
AMBN	SCG3	9606.ENSP00000313809	9606.ENSP00000220478	0	0	0	0	0	0	0.9	0	0.9
AMBN	VGF	9606.ENSP00000313809	9606.ENSP00000249330	0	0	0	0	0	0	0.9	0	0.9
AMBN	STC2	9606.ENSP00000313809	9606.ENSP00000265087	0	0	0	0	0	0	0.9	0	0.9
AMBN	SCG2	9606.ENSP00000313809	9606.ENSP00000304133	0	0	0	0	0	0	0.9	0	0.9
AMBN	MSLN	9606.ENSP00000313809	9606.ENSP00000372313	0	0	0	0	0	0	0.9	0	0.9
AMBN	CHGB	9606.ENSP00000313809	9606.ENSP00000368244	0	0	0	0	0	0	0.9	0	0.9
AMBN	MATN3	9606.ENSP00000313809	9606.ENSP00000383894	0	0	0	0	0	0	0.9	0	0.9
AMBN	NOTUM	9606.ENSP00000313809	9606.ENSP00000387310	0	0	0	0	0.062	0	0.9	0	0.902
AMBN	GPC3	9606.ENSP00000313809	9606.ENSP00000377836	0	0	0	0	0.065	0	0.9	0	0.902
AMBN	SPP1	9606.ENSP00000313809	9606.ENSP00000378517	0	0	0	0	0.063	0	0.9	0.442	0.943
AMBN	MEPE	9606.ENSP00000313809	9606.ENSP00000416984	0	0	0	0	0	0	0.9	0.538	0.951
AMBN	SPARCL1	9606.ENSP00000313809	9606.ENSP00000414856	0	0	0	0	0	0	0.9	0.738	0.972
AMH	FOXL2	9606.ENSP00000221496	9606.ENSP00000333188	0	0	0	0	0	0.051	0	0.93	0.931
ANLN	DLGAP5	9606.ENSP00000265748	9606.ENSP00000247191	0	0	0	0	0.909	0	0	0.266	0.93
ANLN	KIF23	9606.ENSP00000265748	9606.ENSP00000260363	0	0	0	0	0.917	0.186	0	0.845	0.988
ANLN	KIF11	9606.ENSP00000265748	9606.ENSP00000260731	0	0	0	0	0.91	0.08	0	0.499	0.955
ANLN	PBK	9606.ENSP00000265748	9606.ENSP00000428489	0	0	0	0	0.865	0	0	0.325	0.905
ANLN	PRC1	9606.ENSP00000265748	9606.ENSP00000377793	0	0	0	0	0.854	0	0	0.391	0.907
ANLN	TPX2	9606.ENSP00000265748	9606.ENSP00000300403	0	0	0	0	0.839	0	0	0.455	0.908
ANLN	KIF4A	9606.ENSP00000265748	9606.ENSP00000363524	0	0	0	0	0.797	0.08	0	0.569	0.912
ANLN	CEP55	9606.ENSP00000265748	9606.ENSP00000360540	0	0	0	0	0.832	0	0	0.517	0.915
ANLN	CDK1	9606.ENSP00000265748	9606.ENSP00000378699	0	0	0	0	0.864	0	0	0.515	0.931
ANLN	ECT2	9606.ENSP00000265748	9606.ENSP00000376457	0	0	0	0	0.643	0	0	0.824	0.934
ANLN	BUB1	9606.ENSP00000265748	9606.ENSP00000302530	0	0	0	0	0.913	0	0	0.328	0.939
ANLN	KIF20A	9606.ENSP00000265748	9606.ENSP00000378356	0	0	0	0	0.847	0.157	0	0.599	0.943
ANLN	RACGAP1	9606.ENSP00000265748	9606.ENSP00000404190	0	0	0	0	0.843	0.19	0	0.891	0.985
AP1M2	CLVS2	9606.ENSP00000250244	9606.ENSP00000275162	0	0	0	0	0	0	0.9	0	0.9
AP1M2	CLVS1	9606.ENSP00000250244	9606.ENSP00000428402	0	0	0	0	0	0	0.9	0	0.9
AP1M2	DNAJC6	9606.ENSP00000250244	9606.ENSP00000360108	0	0	0	0	0.061	0.075	0.9	0.09	0.91
APLN	DRD4	9606.ENSP00000391800	9606.ENSP00000176183	0	0	0	0	0	0	0.9	0.049	0.9
APLN	BDKRB1	9606.ENSP00000391800	9606.ENSP00000216629	0	0	0	0	0	0	0.9	0.15	0.911
APLN	GNGT1	9606.ENSP00000391800	9606.ENSP00000248572	0	0	0	0	0	0	0.9	0	0.9
APLN	MTNR1B	9606.ENSP00000391800	9606.ENSP00000257068	0	0	0	0	0	0	0.9	0.048	0.9
APLN	GABBR2	9606.ENSP00000391800	9606.ENSP00000259455	0	0	0	0	0	0	0.9	0	0.9
APLN	OPRK1	9606.ENSP00000391800	9606.ENSP00000265572	0	0	0	0	0	0	0.9	0.256	0.922
APLN	GAL	9606.ENSP00000391800	9606.ENSP00000265643	0	0	0	0	0	0	0.9	0.25	0.921
APLN	SST	9606.ENSP00000391800	9606.ENSP00000287641	0	0	0	0	0	0	0.9	0.186	0.915
APLN	SSTR5	9606.ENSP00000391800	9606.ENSP00000293897	0	0	0	0	0	0	0.9	0.116	0.907
APLN	CXCL5	9606.ENSP00000391800	9606.ENSP00000296027	0	0	0	0	0	0	0.9	0	0.9
APLN	HTR1F	9606.ENSP00000391800	9606.ENSP00000322924	0	0	0	0	0	0	0.9	0.058	0.901
APLN	RXFP4	9606.ENSP00000391800	9606.ENSP00000357301	0	0	0	0	0	0	0.9	0.088	0.904
APLN	CNR1	9606.ENSP00000391800	9606.ENSP00000358513	0	0	0	0	0	0	0.9	0.189	0.915
APLN	HTR1B	9606.ENSP00000391800	9606.ENSP00000358963	0	0	0	0	0.088	0	0.9	0.056	0.906
APLN	P2RY4	9606.ENSP00000391800	9606.ENSP00000363643	0	0	0	0	0	0	0.9	0	0.9
APLN	HTR1D	9606.ENSP00000391800	9606.ENSP00000363748	0	0	0	0	0	0	0.9	0	0.9
APLN	CCL25	9606.ENSP00000391800	9606.ENSP00000375086	0	0	0	0	0	0	0.9	0	0.9
APLN	GNG4	9606.ENSP00000391800	9606.ENSP00000375727	0	0	0	0	0	0	0.9	0	0.9
APLN	HCAR1	9606.ENSP00000391800	9606.ENSP00000389255	0	0	0	0	0	0	0.9	0.108	0.906
APLN	CCR3	9606.ENSP00000391800	9606.ENSP00000441600	0	0	0	0	0	0	0.9	0	0.9
APLN	LPAR3	9606.ENSP00000391800	9606.ENSP00000395389	0	0	0	0	0	0	0.9	0	0.9
APLN	GRM4	9606.ENSP00000391800	9606.ENSP00000440556	0	0	0	0	0	0	0.9	0.064	0.902
APLN	SSTR3	9606.ENSP00000391800	9606.ENSP00000480971	0	0	0	0	0	0	0.9	0.108	0.906
APLN	PPY	9606.ENSP00000391800	9606.ENSP00000466009	0	0	0	0	0	0	0.9	0.121	0.908
APLN	RLN3	9606.ENSP00000391800	9606.ENSP00000397415	0	0	0	0	0	0	0.9	0.23	0.919
APOA4	RBP2	9606.ENSP00000350425	9606.ENSP00000232217	0	0	0	0	0.352	0	0.9	0.174	0.941
APOA4	GPC2	9606.ENSP00000350425	9606.ENSP00000292377	0	0	0	0	0	0	0.9	0	0.9
APOA4	LPL	9606.ENSP00000350425	9606.ENSP00000309757	0	0	0	0	0	0	0.9	0.567	0.954
APOA4	GPC3	9606.ENSP00000350425	9606.ENSP00000377836	0	0	0	0	0	0	0.9	0	0.9
AQP10	AQP8	9606.ENSP00000318355	9606.ENSP00000219660	0	0	0.422	0	0.064	0	0	0.886	0.933
AQP10	AQP6	9606.ENSP00000318355	9606.ENSP00000477688	0	0	0.419	0	0	0	0	0.846	0.906
ARHGAP11A	RHOV	9606.ENSP00000355090	9606.ENSP00000220507	0	0	0	0	0	0.265	0.9	0.102	0.928
ARHGAP11A	DLGAP5	9606.ENSP00000355090	9606.ENSP00000247191	0	0	0	0	0.902	0	0	0.064	0.904
ARHGAP11A	KIF11	9606.ENSP00000355090	9606.ENSP00000260731	0	0	0	0	0.919	0	0	0.228	0.935
ARHGAP11A	CCNA2	9606.ENSP00000355090	9606.ENSP00000274026	0	0	0	0	0.914	0	0	0.085	0.918
ARHGAP11A	BUB1B	9606.ENSP00000355090	9606.ENSP00000287598	0	0	0	0	0.903	0	0	0	0.903
ARHGAP11A	BUB1	9606.ENSP00000355090	9606.ENSP00000302530	0	0	0	0	0.931	0	0	0.082	0.934
ARHGAP11A	CDK1	9606.ENSP00000355090	9606.ENSP00000378699	0	0	0	0	0.896	0.073	0	0.056	0.901
ARHGAP11A	TTK	9606.ENSP00000355090	9606.ENSP00000358813	0	0	0	0	0.899	0	0	0.08	0.903
ARHGAP11A	KIF20A	9606.ENSP00000355090	9606.ENSP00000378356	0	0	0	0	0.903	0	0	0	0.903
ARHGAP11A	TOP2A	9606.ENSP00000355090	9606.ENSP00000411532	0	0	0	0	0.91	0	0	0.139	0.919
ARHGAP11A	DEPDC1	9606.ENSP00000355090	9606.ENSP00000412292	0	0	0	0	0.892	0	0	0.318	0.923
ARHGAP11B	RHOV	9606.ENSP00000481934	9606.ENSP00000220507	0	0	0	0	0	0.265	0.9	0.102	0.928
ARHGAP36	RHOV	9606.ENSP00000276211	9606.ENSP00000220507	0	0	0	0	0	0.265	0.9	0.183	0.934
ARHGAP40	RHOV	9606.ENSP00000362442	9606.ENSP00000220507	0	0	0	0	0.076	0.088	0.9	0	0.908
ARHGDIG	RHOV	9606.ENSP00000219409	9606.ENSP00000220507	0	0	0	0	0.061	0.352	0.9	0.128	0.939
ARHGEF39	RHOV	9606.ENSP00000367638	9606.ENSP00000220507	0	0	0	0	0	0	0.9	0	0.9
ASB11	ASB16	9606.ENSP00000417914	9606.ENSP00000293414	0	0	0.353	0.62	0.064	0	0.9	0	0.914
ASB11	ASB5	9606.ENSP00000417914	9606.ENSP00000296525	0	0	0.441	0.951	0.062	0	0.9	0.422	0.906
ASB11	TRIM50	9606.ENSP00000417914	9606.ENSP00000327994	0	0	0	0	0.062	0.079	0.9	0	0.906
ASB11	TRAIP	9606.ENSP00000417914	9606.ENSP00000328203	0	0	0	0	0	0	0.9	0	0.9
ASB11	UBE2C	9606.ENSP00000417914	9606.ENSP00000348838	0	0	0	0	0.063	0.088	0.9	0.044	0.907
ASB11	UBE2U	9606.ENSP00000417914	9606.ENSP00000360116	0	0	0	0	0	0.088	0.9	0.044	0.905
ASB11	CDC20	9606.ENSP00000417914	9606.ENSP00000361540	0	0	0	0	0	0.123	0.9	0	0.908
ASB11	TRIM63	9606.ENSP00000417914	9606.ENSP00000363390	0	0	0	0	0.083	0.079	0.9	0.273	0.93
ASB11	TRIM71	9606.ENSP00000417914	9606.ENSP00000373272	0	0	0	0	0.057	0.079	0.9	0	0.905
ASB11	FBXW10	9606.ENSP00000417914	9606.ENSP00000379025	0	0	0	0	0	0.129	0.9	0	0.909
ASB11	CCNF	9606.ENSP00000417914	9606.ENSP00000380256	0	0	0	0	0.05	0.128	0.9	0.049	0.91
ASB11	FBXL16	9606.ENSP00000417914	9606.ENSP00000380746	0	0	0	0	0.064	0	0.9	0	0.902
ASB11	ASB15	9606.ENSP00000417914	9606.ENSP00000397655	0	0	0.403	0.614	0.1	0	0.9	0.106	0.921
ASB15	ASB16	9606.ENSP00000397655	9606.ENSP00000293414	0	0	0.359	0.571	0	0	0.9	0	0.914
ASB15	ASB5	9606.ENSP00000397655	9606.ENSP00000296525	0	0	0.419	0.644	0.1	0	0.9	0.527	0.933
ASB15	TRIM50	9606.ENSP00000397655	9606.ENSP00000327994	0	0	0	0	0.063	0.079	0.9	0	0.906
ASB15	TRAIP	9606.ENSP00000397655	9606.ENSP00000328203	0	0	0	0	0	0	0.9	0	0.9
ASB15	UBE2C	9606.ENSP00000397655	9606.ENSP00000348838	0	0	0	0	0	0.088	0.9	0.044	0.905
ASB15	UBE2U	9606.ENSP00000397655	9606.ENSP00000360116	0	0	0	0	0	0.088	0.9	0.044	0.905
ASB15	CDC20	9606.ENSP00000397655	9606.ENSP00000361540	0	0	0	0	0	0.123	0.9	0	0.908
ASB15	TRIM63	9606.ENSP00000397655	9606.ENSP00000363390	0	0	0	0	0.089	0.079	0.9	0.105	0.914
ASB15	TRIM71	9606.ENSP00000397655	9606.ENSP00000373272	0	0	0	0	0.057	0.079	0.9	0	0.905
ASB15	FBXW10	9606.ENSP00000397655	9606.ENSP00000379025	0	0	0	0	0	0.129	0.9	0	0.909
ASB15	CCNF	9606.ENSP00000397655	9606.ENSP00000380256	0	0	0	0	0.05	0.128	0.9	0.049	0.91
ASB15	FBXL16	9606.ENSP00000397655	9606.ENSP00000380746	0	0	0	0	0.064	0	0.9	0	0.902
ASB16	TRAIP	9606.ENSP00000293414	9606.ENSP00000328203	0	0	0	0	0	0	0.9	0	0.9
ASB16	FBXL16	9606.ENSP00000293414	9606.ENSP00000380746	0	0	0	0	0.064	0	0.9	0	0.902
ASB16	TRIM63	9606.ENSP00000293414	9606.ENSP00000363390	0	0	0	0	0.061	0.079	0.9	0	0.905
ASB16	TRIM71	9606.ENSP00000293414	9606.ENSP00000373272	0	0	0	0	0.057	0.079	0.9	0	0.905
ASB16	TRIM50	9606.ENSP00000293414	9606.ENSP00000327994	0	0	0	0	0.057	0.079	0.9	0	0.905
ASB16	UBE2U	9606.ENSP00000293414	9606.ENSP00000360116	0	0	0	0	0	0.088	0.9	0.044	0.905
ASB16	CDC20	9606.ENSP00000293414	9606.ENSP00000361540	0	0	0	0	0	0.123	0.9	0.045	0.908
ASB16	UBE2C	9606.ENSP00000293414	9606.ENSP00000348838	0	0	0	0	0	0.088	0.9	0.076	0.908
ASB16	FBXW10	9606.ENSP00000293414	9606.ENSP00000379025	0	0	0	0	0	0.129	0.9	0	0.909
ASB16	CCNF	9606.ENSP00000293414	9606.ENSP00000380256	0	0	0	0	0.05	0.128	0.9	0.049	0.91
ASB16	ASB5	9606.ENSP00000293414	9606.ENSP00000296525	0	0	0.393	0.635	0.064	0	0.9	0	0.915
ASB5	TRAIP	9606.ENSP00000296525	9606.ENSP00000328203	0	0	0	0	0	0	0.9	0	0.9
ASB5	FBXL16	9606.ENSP00000296525	9606.ENSP00000380746	0	0	0	0	0.064	0	0.9	0	0.902
ASB5	TRIM71	9606.ENSP00000296525	9606.ENSP00000373272	0	0	0	0	0.057	0.079	0.9	0	0.905
ASB5	UBE2U	9606.ENSP00000296525	9606.ENSP00000360116	0	0	0	0	0	0.088	0.9	0.044	0.905
ASB5	TRIM50	9606.ENSP00000296525	9606.ENSP00000327994	0	0	0	0	0.062	0.079	0.9	0	0.906
ASB5	UBE2C	9606.ENSP00000296525	9606.ENSP00000348838	0	0	0	0	0.063	0.088	0.9	0.044	0.907
ASB5	CDC20	9606.ENSP00000296525	9606.ENSP00000361540	0	0	0	0	0	0.123	0.9	0	0.908
ASB5	TRIM63	9606.ENSP00000296525	9606.ENSP00000363390	0	0	0	0	0.071	0.079	0.9	0.075	0.91
ASB5	CCNF	9606.ENSP00000296525	9606.ENSP00000380256	0	0	0	0	0.05	0.128	0.9	0.049	0.91
ASB5	FBXW10	9606.ENSP00000296525	9606.ENSP00000379025	0	0	0	0	0	0.129	0.9	0.147	0.919
ASF1B	CDC45	9606.ENSP00000263382	9606.ENSP00000405726	0	0	0	0	0.824	0.058	0	0.461	0.902
ASF1B	CCNA2	9606.ENSP00000263382	9606.ENSP00000274026	0	0	0	0	0.883	0.132	0	0.162	0.907
ASF1B	KIF20A	9606.ENSP00000263382	9606.ENSP00000378356	0	0	0	0	0.886	0	0	0.236	0.91
ASF1B	AURKB	9606.ENSP00000263382	9606.ENSP00000313950	0	0	0	0	0.898	0	0	0.161	0.911
ASF1B	RRM2	9606.ENSP00000263382	9606.ENSP00000353770	0	0	0	0	0.845	0.309	0	0.295	0.918
ASF1B	HIST1H4E	9606.ENSP00000263382	9606.ENSP00000484789	0	0	0	0	0.064	0.871	0	0.371	0.918
ASF1B	HIST1H4H	9606.ENSP00000263382	9606.ENSP00000366956	0	0	0	0	0.064	0.871	0	0.371	0.918
ASF1B	CDC20	9606.ENSP00000263382	9606.ENSP00000361540	0	0	0	0	0.907	0.064	0	0.213	0.925
ASF1B	CCNB2	9606.ENSP00000263382	9606.ENSP00000288207	0	0	0	0	0.921	0.188	0	0.131	0.939
ASF1B	CDCA8	9606.ENSP00000263382	9606.ENSP00000362146	0	0	0	0	0.919	0	0	0.298	0.941
ASF1B	MCM2	9606.ENSP00000263382	9606.ENSP00000265056	0	0	0	0	0.771	0.709	0	0.831	0.987
ASF1B	CHAF1B	9606.ENSP00000263382	9606.ENSP00000315700	0	0	0	0	0.553	0.922	0	0.765	0.991
ASIC1	STOML3	9606.ENSP00000228468	9606.ENSP00000368952	0	0	0	0	0	0.092	0.9	0.451	0.945
ASPHD1	SEZ6L2	9606.ENSP00000311447	9606.ENSP00000481917	0	0	0	0	0.327	0	0	0.874	0.911
ASPM	AURKA	9606.ENSP00000356379	9606.ENSP00000216911	0	0	0	0	0.898	0.272	0	0.484	0.958
ASPM	NCAPH	9606.ENSP00000356379	9606.ENSP00000240423	0	0	0	0	0.903	0	0	0.15	0.914
ASPM	DLGAP5	9606.ENSP00000356379	9606.ENSP00000247191	0	0	0	0	0.982	0	0	0.186	0.985
ASPM	NCAPG	9606.ENSP00000356379	9606.ENSP00000251496	0	0	0	0	0.991	0	0	0.293	0.993
ASPM	CCNB1	9606.ENSP00000356379	9606.ENSP00000256442	0	0	0	0	0.95	0.063	0	0.42	0.97
ASPM	KIF23	9606.ENSP00000356379	9606.ENSP00000260363	0	0	0	0	0.976	0.086	0	0.466	0.987
ASPM	KIF11	9606.ENSP00000356379	9606.ENSP00000260731	0	0	0	0	0.988	0.086	0	0.644	0.995
ASPM	NDC80	9606.ENSP00000356379	9606.ENSP00000261597	0	0	0	0	0.98	0	0	0.066	0.98
ASPM	KIF18A	9606.ENSP00000356379	9606.ENSP00000263181	0	0	0	0	0.847	0.086	0	0.35	0.901
ASPM	CENPE	9606.ENSP00000356379	9606.ENSP00000265148	0	0	0	0	0.985	0.086	0	0.472	0.992
ASPM	NUF2	9606.ENSP00000356379	9606.ENSP00000271452	0	0	0	0	0.897	0	0	0.257	0.92
ASPM	CCNA2	9606.ENSP00000356379	9606.ENSP00000274026	0	0	0	0	0.976	0.063	0	0.228	0.981
ASPM	BUB1B	9606.ENSP00000356379	9606.ENSP00000287598	0	0	0	0	0.923	0.353	0	0.408	0.968
ASPM	CCNB2	9606.ENSP00000356379	9606.ENSP00000288207	0	0	0	0	0.909	0.063	0	0.423	0.946
ASPM	MAD2L1	9606.ENSP00000356379	9606.ENSP00000296509	0	0	0	0	0.96	0.261	0	0.328	0.978
ASPM	MELK	9606.ENSP00000356379	9606.ENSP00000298048	0	0	0	0	0.923	0.064	0	0.346	0.949
ASPM	KIAA0101	9606.ENSP00000356379	9606.ENSP00000300035	0	0	0	0	0.903	0	0	0.068	0.906
ASPM	PLK1	9606.ENSP00000356379	9606.ENSP00000300093	0	0	0	0	0.939	0.423	0	0.493	0.98
ASPM	TPX2	9606.ENSP00000356379	9606.ENSP00000300403	0	0	0	0	0.966	0	0	0.096	0.968
ASPM	BIRC5	9606.ENSP00000356379	9606.ENSP00000301633	0	0	0	0	0.892	0	0	0.253	0.916
ASPM	BUB1	9606.ENSP00000356379	9606.ENSP00000302530	0	0	0	0	0.984	0.353	0	0.446	0.993
ASPM	CKAP2L	9606.ENSP00000356379	9606.ENSP00000305204	0	0	0	0	0.869	0	0	0.432	0.922
ASPM	AURKB	9606.ENSP00000356379	9606.ENSP00000313950	0	0	0	0	0.955	0.08	0	0.419	0.974
ASPM	KIF15	9606.ENSP00000356379	9606.ENSP00000324020	0	0	0	0	0.934	0.103	0	0.578	0.973
ASPM	TACC3	9606.ENSP00000356379	9606.ENSP00000326550	0	0	0	0	0.914	0	0	0.506	0.955
ASPM	CDKN3	9606.ENSP00000356379	9606.ENSP00000335357	0	0	0	0	0.897	0.094	0	0.369	0.936
ASPM	UBE2C	9606.ENSP00000356379	9606.ENSP00000348838	0	0	0	0	0.898	0.081	0	0.296	0.928
ASPM	RRM2	9606.ENSP00000356379	9606.ENSP00000353770	0	0	0	0	0.913	0.064	0	0.077	0.918
ASPM	EXO1	9606.ENSP00000356379	9606.ENSP00000355506	0	0	0	0	0.918	0.104	0	0.089	0.927
ASPM	CENPF	9606.ENSP00000356379	9606.ENSP00000355922	0	0	0	0	0.962	0	0	0.495	0.98
ASPM	DTL	9606.ENSP00000356379	9606.ENSP00000355958	0	0	0	0	0.92	0	0	0	0.92
ASPM	NEK2	9606.ENSP00000356379	9606.ENSP00000355966	0	0	0	0	0.91	0.064	0	0.149	0.922
ASPM	KIF14	9606.ENSP00000356379	9606.ENSP00000356319	0	0	0	0	0.915	0.086	0	0.258	0.937
ASPM	HJURP	9606.ENSP00000356379	9606.ENSP00000414109	0	0	0	0	0.893	0	0	0.163	0.906
ASPM	DEPDC1	9606.ENSP00000356379	9606.ENSP00000412292	0	0	0	0	0.9	0	0	0.292	0.926
ASPM	MKI67	9606.ENSP00000356379	9606.ENSP00000357643	0	0	0	0	0.927	0	0	0.225	0.941
ASPM	KIF2C	9606.ENSP00000356379	9606.ENSP00000361298	0	0	0	0	0.915	0.086	0	0.321	0.942
ASPM	PBK	9606.ENSP00000356379	9606.ENSP00000428489	0	0	0	0	0.925	0.064	0	0.312	0.947
ASPM	CDCA3	9606.ENSP00000356379	9606.ENSP00000442068	0	0	0	0	0.93	0	0	0.292	0.948
ASPM	HMMR	9606.ENSP00000356379	9606.ENSP00000377492	0	0	0	0	0.931	0	0	0.297	0.95
ASPM	KIF20A	9606.ENSP00000356379	9606.ENSP00000378356	0	0	0	0	0.914	0.086	0	0.43	0.951
ASPM	CEP55	9606.ENSP00000356379	9606.ENSP00000360540	0	0	0	0	0.932	0	0	0.325	0.952
ASPM	STIL	9606.ENSP00000356379	9606.ENSP00000360944	0	0	0	0	0.778	0	0	0.799	0.953
ASPM	ECT2	9606.ENSP00000356379	9606.ENSP00000376457	0	0	0	0	0.942	0.084	0	0.287	0.958
ASPM	CDCA8	9606.ENSP00000356379	9606.ENSP00000362146	0	0	0	0	0.966	0	0	0.12	0.969
ASPM	KIF4A	9606.ENSP00000356379	9606.ENSP00000363524	0	0	0	0	0.945	0.086	0	0.458	0.97
ASPM	TOP2A	9606.ENSP00000356379	9606.ENSP00000411532	0	0	0	0	0.967	0	0	0.234	0.973
ASPM	PRC1	9606.ENSP00000356379	9606.ENSP00000377793	0	0	0	0	0.965	0.071	0	0.323	0.976
ASPM	NUSAP1	9606.ENSP00000356379	9606.ENSP00000453403	0	0	0	0	0.975	0	0	0.22	0.98
ASPM	CDC20	9606.ENSP00000356379	9606.ENSP00000361540	0	0	0	0	0.972	0.168	0	0.346	0.983
ASPM	TTK	9606.ENSP00000356379	9606.ENSP00000358813	0	0	0	0	0.986	0	0	0.229	0.988
ASPM	CDK1	9606.ENSP00000356379	9606.ENSP00000378699	0	0	0	0	0.99	0.057	0	0.458	0.994
ASZ1	DDX4	9606.ENSP00000284629	9606.ENSP00000424838	0	0	0	0	0.064	0.084	0.9	0.552	0.956
ASZ1	MAEL	9606.ENSP00000284629	9606.ENSP00000356846	0	0	0	0	0.062	0	0.9	0.811	0.98
ATP1A2	FXYD3	9606.ENSP00000354490	9606.ENSP00000473929	0	0	0	0	0.061	0	0.9	0.159	0.914
AURKA	PSMA8	9606.ENSP00000216911	9606.ENSP00000311121	0	0	0	0	0.062	0	0.9	0.059	0.904
AURKA	RRM2	9606.ENSP00000216911	9606.ENSP00000353770	0	0	0	0	0.825	0	0	0.476	0.904
AURKA	CDCA3	9606.ENSP00000216911	9606.ENSP00000442068	0	0	0	0	0.87	0	0	0.316	0.907
AURKA	TUBB4A	9606.ENSP00000216911	9606.ENSP00000264071	0	0	0	0	0.063	0.05	0.9	0.095	0.908
AURKA	CDC45	9606.ENSP00000216911	9606.ENSP00000405726	0	0	0	0	0.89	0	0	0.2	0.909
AURKA	CENPF	9606.ENSP00000216911	9606.ENSP00000355922	0	0	0	0	0.846	0	0	0.46	0.913
AURKA	CEP55	9606.ENSP00000216911	9606.ENSP00000360540	0	0	0	0	0.848	0.102	0	0.426	0.914
AURKA	PBK	9606.ENSP00000216911	9606.ENSP00000428489	0	0	0	0	0.877	0.065	0	0.337	0.917
AURKA	SGOL1	9606.ENSP00000216911	9606.ENSP00000263753	0	0	0	0	0.882	0	0	0.348	0.919
AURKA	MELK	9606.ENSP00000216911	9606.ENSP00000298048	0	0	0	0.738	0.917	0	0	0.54	0.928
AURKA	ECT2	9606.ENSP00000216911	9606.ENSP00000376457	0	0	0	0	0.872	0.09	0	0.451	0.93
AURKA	RACGAP1	9606.ENSP00000216911	9606.ENSP00000404190	0	0	0	0	0.874	0	0	0.523	0.937
AURKA	CCNE2	9606.ENSP00000216911	9606.ENSP00000429089	0	0	0	0	0.275	0.879	0	0.354	0.938
AURKA	NCAPH	9606.ENSP00000216911	9606.ENSP00000240423	0	0	0	0	0.835	0.417	0	0.418	0.939
AURKA	CDKN3	9606.ENSP00000216911	9606.ENSP00000335357	0	0	0	0	0.901	0.194	0	0.36	0.945
AURKA	NCAPG	9606.ENSP00000216911	9606.ENSP00000251496	0	0	0	0	0.898	0.263	0	0.372	0.949
AURKA	TTK	9606.ENSP00000216911	9606.ENSP00000358813	0	0	0	0.626	0.914	0.265	0	0.706	0.951
AURKA	PRC1	9606.ENSP00000216911	9606.ENSP00000377793	0	0	0	0	0.927	0.055	0	0.402	0.955
AURKA	FOXM1	9606.ENSP00000216911	9606.ENSP00000342307	0	0	0	0	0.818	0	0	0.764	0.955
AURKA	KIF4A	9606.ENSP00000216911	9606.ENSP00000363524	0	0	0	0	0.921	0.125	0	0.498	0.962
AURKA	NUSAP1	9606.ENSP00000216911	9606.ENSP00000453403	0	0	0	0	0.94	0	0	0.403	0.963
AURKA	CENPE	9606.ENSP00000216911	9606.ENSP00000265148	0	0	0	0	0.887	0.189	0	0.64	0.964
AURKA	BUB1B	9606.ENSP00000216911	9606.ENSP00000287598	0	0	0	0	0.844	0.246	0	0.747	0.967
AURKA	KIF20A	9606.ENSP00000216911	9606.ENSP00000378356	0	0	0	0	0.94	0.125	0	0.546	0.974
AURKA	KIF23	9606.ENSP00000216911	9606.ENSP00000260363	0	0	0	0	0.919	0.125	0	0.665	0.974
AURKA	TOP2A	9606.ENSP00000216911	9606.ENSP00000411532	0	0	0	0	0.92	0.261	0	0.634	0.976
AURKA	MYCN	9606.ENSP00000216911	9606.ENSP00000281043	0	0	0	0	0.061	0.899	0	0.765	0.976
AURKA	KIF2C	9606.ENSP00000216911	9606.ENSP00000361298	0	0	0	0	0.868	0.433	0	0.76	0.98
AURKA	MAD2L1	9606.ENSP00000216911	9606.ENSP00000296509	0	0	0	0	0.923	0.169	0	0.724	0.981
AURKA	CDCA8	9606.ENSP00000216911	9606.ENSP00000362146	0	0	0	0	0.933	0	0.54	0.586	0.986
AURKA	CCNA2	9606.ENSP00000216911	9606.ENSP00000274026	0	0	0	0	0.964	0.177	0	0.582	0.986
AURKA	NDC80	9606.ENSP00000216911	9606.ENSP00000261597	0	0	0	0	0.909	0.484	0	0.774	0.988
AURKA	PLK4	9606.ENSP00000216911	9606.ENSP00000270861	0	0	0	0.81	0.812	0.342	0.9	0.66	0.988
AURKA	NEK2	9606.ENSP00000216911	9606.ENSP00000355966	0	0	0.361	0.69	0.877	0	0.9	0.679	0.99
AURKA	CCNB1	9606.ENSP00000216911	9606.ENSP00000256442	0	0	0	0	0.925	0.291	0	0.858	0.991
AURKA	KIF15	9606.ENSP00000216911	9606.ENSP00000324020	0	0	0	0	0.754	0.125	0.9	0.72	0.993
AURKA	AURKB	9606.ENSP00000216911	9606.ENSP00000313950	0	0	0.445	0.959	0.925	0.094	0.9	0.878	0.993
AURKA	BUB1	9606.ENSP00000216911	9606.ENSP00000302530	0	0	0	0	0.962	0.246	0	0.783	0.993
AURKA	HMMR	9606.ENSP00000216911	9606.ENSP00000377492	0	0	0	0	0.827	0.342	0.9	0.552	0.994
AURKA	KIF11	9606.ENSP00000216911	9606.ENSP00000260731	0	0	0	0	0.94	0.482	0	0.831	0.994
AURKA	PTTG1	9606.ENSP00000216911	9606.ENSP00000377536	0	0	0	0	0.907	0.305	0.9	0.712	0.997
AURKA	UBE2C	9606.ENSP00000216911	9606.ENSP00000348838	0	0	0	0	0.949	0.064	0.9	0.639	0.998
AURKA	PLK1	9606.ENSP00000216911	9606.ENSP00000300093	0	0	0	0.749	0.947	0.594	0.9	0.917	0.998
AURKA	CENPA	9606.ENSP00000216911	9606.ENSP00000336868	0	0	0	0	0.827	0.294	0.9	0.912	0.998
AURKA	BIRC5	9606.ENSP00000216911	9606.ENSP00000301633	0	0	0	0	0.869	0.56	0.9	0.711	0.998
AURKA	CDK1	9606.ENSP00000216911	9606.ENSP00000378699	0	0	0.424	0.755	0.965	0.88	0.9	0.817	0.999
AURKA	DLGAP5	9606.ENSP00000216911	9606.ENSP00000247191	0	0	0	0	0.946	0.387	0.9	0.736	0.999
AURKA	CDC20	9606.ENSP00000216911	9606.ENSP00000361540	0	0	0	0	0.977	0.379	0.9	0.743	0.999
AURKA	CCNB2	9606.ENSP00000216911	9606.ENSP00000288207	0	0	0	0	0.973	0.896	0	0.696	0.999
AURKA	TPX2	9606.ENSP00000216911	9606.ENSP00000300403	0	0	0	0	0.952	0.982	0.9	0.886	0.999
AURKA	TACC3	9606.ENSP00000216911	9606.ENSP00000326550	0	0	0	0	0.694	0.909	0.9	0.89	0.999
AURKB	CDC6	9606.ENSP00000313950	9606.ENSP00000209728	0	0	0	0	0.767	0.188	0	0.588	0.915
AURKB	CENPM	9606.ENSP00000313950	9606.ENSP00000215980	0	0	0	0	0.805	0	0.9	0.286	0.984
AURKB	NCAPH	9606.ENSP00000313950	9606.ENSP00000240423	0	0	0	0	0.843	0.596	0.9	0.702	0.997
AURKB	DLGAP5	9606.ENSP00000313950	9606.ENSP00000247191	0	0	0	0	0.947	0	0	0.524	0.973
AURKB	NCAPG	9606.ENSP00000313950	9606.ENSP00000251496	0	0	0	0	0.959	0.263	0.9	0.379	0.997
AURKB	CCNB1	9606.ENSP00000313950	9606.ENSP00000256442	0	0	0	0	0.933	0.291	0.9	0.797	0.998
AURKB	TROAP	9606.ENSP00000313950	9606.ENSP00000257909	0	0	0	0	0.915	0	0	0.145	0.925
AURKB	KIF23	9606.ENSP00000313950	9606.ENSP00000260363	0	0	0	0	0.887	0.125	0.9	0.906	0.998
AURKB	KIF11	9606.ENSP00000313950	9606.ENSP00000260731	0	0	0	0	0.961	0.261	0	0.801	0.993
AURKB	NDC80	9606.ENSP00000313950	9606.ENSP00000261597	0	0	0	0	0.961	0.484	0.9	0.962	0.999
AURKB	KIF18A	9606.ENSP00000313950	9606.ENSP00000263181	0	0	0	0	0.44	0.186	0.9	0.493	0.973
AURKB	SGOL1	9606.ENSP00000313950	9606.ENSP00000263753	0	0	0	0	0.851	0.379	0.9	0.705	0.996
AURKB	CENPE	9606.ENSP00000313950	9606.ENSP00000265148	0	0	0	0	0.935	0.189	0.9	0.783	0.998
AURKB	NUF2	9606.ENSP00000313950	9606.ENSP00000271452	0	0	0	0	0.838	0.328	0.9	0.74	0.996
AURKB	CCNA2	9606.ENSP00000313950	9606.ENSP00000274026	0	0	0	0	0.969	0.177	0	0.661	0.99
AURKB	CDCA5	9606.ENSP00000313950	9606.ENSP00000275517	0	0	0	0	0.785	0	0.9	0.711	0.993
AURKB	CENPU	9606.ENSP00000313950	9606.ENSP00000281453	0	0	0	0	0.55	0	0.9	0.405	0.97
AURKB	SPC25	9606.ENSP00000313950	9606.ENSP00000282074	0	0	0	0	0.675	0	0.9	0.441	0.98
AURKB	SKA1	9606.ENSP00000313950	9606.ENSP00000285116	0	0	0	0	0.808	0.354	0.9	0.733	0.996
AURKB	BUB1B	9606.ENSP00000313950	9606.ENSP00000287598	0	0	0	0	0.918	0.444	0.9	0.912	0.999
AURKB	CCNB2	9606.ENSP00000313950	9606.ENSP00000288207	0	0	0	0	0.962	0.291	0.9	0.677	0.999
AURKB	MAD2L1	9606.ENSP00000313950	9606.ENSP00000296509	0	0	0	0	0.955	0.169	0.9	0.722	0.998
AURKB	KIAA0101	9606.ENSP00000313950	9606.ENSP00000300035	0	0	0	0	0.925	0	0	0.111	0.93
AURKB	PLK1	9606.ENSP00000313950	9606.ENSP00000300093	0	0	0	0.751	0.947	0.365	0.9	0.907	0.997
AURKB	TPX2	9606.ENSP00000313950	9606.ENSP00000300403	0	0	0	0	0.897	0.435	0	0.779	0.986
AURKB	BIRC5	9606.ENSP00000313950	9606.ENSP00000301633	0	0	0	0	0.874	0.588	0.9	0.701	0.998
AURKB	BUB1	9606.ENSP00000313950	9606.ENSP00000302530	0	0	0	0	0.921	0.246	0.9	0.861	0.999
AURKB	PSMA8	9606.ENSP00000313950	9606.ENSP00000311121	0	0	0	0	0.062	0	0.9	0.073	0.905
AURKB	DYNC1I1	9606.ENSP00000313950	9606.ENSP00000320130	0	0	0	0	0.049	0	0.9	0.05	0.901
AURKB	UHRF1	9606.ENSP00000313950	9606.ENSP00000479617	0	0	0	0	0.881	0	0	0.215	0.902
AURKB	PBK	9606.ENSP00000313950	9606.ENSP00000428489	0	0	0	0	0.859	0.065	0	0.33	0.904
AURKB	CEP55	9606.ENSP00000313950	9606.ENSP00000360540	0	0	0	0	0.818	0	0	0.508	0.907
AURKB	ECT2	9606.ENSP00000313950	9606.ENSP00000376457	0	0	0	0	0.791	0.09	0	0.555	0.908
AURKB	HJURP	9606.ENSP00000313950	9606.ENSP00000414109	0	0	0	0	0.885	0	0	0.324	0.919
AURKB	CDC25C	9606.ENSP00000313950	9606.ENSP00000321656	0	0	0	0	0.725	0	0	0.733	0.923
AURKB	CDCA3	9606.ENSP00000313950	9606.ENSP00000442068	0	0	0	0	0.888	0	0	0.356	0.925
AURKB	NEK2	9606.ENSP00000313950	9606.ENSP00000355966	0	0	0.388	0.695	0.895	0	0	0.676	0.926
AURKB	CDC45	9606.ENSP00000313950	9606.ENSP00000405726	0	0	0	0	0.891	0	0	0.366	0.928
AURKB	CENPL	9606.ENSP00000313950	9606.ENSP00000348527	0	0	0	0	0.187	0	0.9	0.267	0.935
AURKB	GSG2	9606.ENSP00000313950	9606.ENSP00000325290	0	0	0	0	0.344	0.379	0	0.862	0.939
AURKB	FOXM1	9606.ENSP00000313950	9606.ENSP00000342307	0	0	0	0	0.841	0	0	0.658	0.943
AURKB	PRC1	9606.ENSP00000313950	9606.ENSP00000377793	0	0	0	0	0.904	0.055	0	0.436	0.944
AURKB	RRM2	9606.ENSP00000313950	9606.ENSP00000353770	0	0	0	0	0.921	0	0	0.337	0.945
AURKB	KIF15	9606.ENSP00000313950	9606.ENSP00000324020	0	0	0	0	0.882	0.125	0	0.536	0.948
AURKB	STMN1	9606.ENSP00000313950	9606.ENSP00000410452	0	0	0	0	0.243	0	0.9	0.452	0.954
AURKB	CENPK	9606.ENSP00000313950	9606.ENSP00000379911	0	0	0	0	0.371	0	0.9	0.349	0.955
AURKB	KIFC1	9606.ENSP00000313950	9606.ENSP00000393963	0	0	0	0	0.891	0.125	0	0.575	0.956
AURKB	NUSAP1	9606.ENSP00000313950	9606.ENSP00000453403	0	0	0	0	0.933	0	0	0.455	0.962
AURKB	TACC3	9606.ENSP00000313950	9606.ENSP00000326550	0	0	0	0	0.884	0.385	0	0.596	0.968
AURKB	ERCC6L	9606.ENSP00000313950	9606.ENSP00000334675	0	0	0	0	0.58	0	0.9	0.355	0.97
AURKB	CENPI	9606.ENSP00000313950	9606.ENSP00000362018	0	0	0	0	0.499	0	0.9	0.498	0.972
AURKB	TOP2A	9606.ENSP00000313950	9606.ENSP00000411532	0	0	0	0	0.941	0.261	0	0.565	0.979
AURKB	TTK	9606.ENSP00000313950	9606.ENSP00000358813	0	0	0	0.645	0.929	0.642	0	0.743	0.98
AURKB	KIF4A	9606.ENSP00000313950	9606.ENSP00000363524	0	0	0	0	0.889	0.125	0	0.823	0.981
AURKB	SGOL2	9606.ENSP00000313950	9606.ENSP00000350447	0	0	0	0	0.666	0	0.9	0.757	0.991
AURKB	CENPF	9606.ENSP00000313950	9606.ENSP00000355922	0	0	0	0	0.803	0	0.9	0.606	0.991
AURKB	SPC24	9606.ENSP00000313950	9606.ENSP00000465075	0	0	0	0	0.849	0	0.9	0.543	0.992
AURKB	ZWINT	9606.ENSP00000313950	9606.ENSP00000363055	0	0	0	0	0.7	0	0.9	0.794	0.993
AURKB	PTTG1	9606.ENSP00000313950	9606.ENSP00000377536	0	0	0	0	0.834	0	0.9	0.688	0.994
AURKB	RACGAP1	9606.ENSP00000313950	9606.ENSP00000404190	0	0	0	0	0.765	0.379	0.9	0.859	0.997
AURKB	UBE2C	9606.ENSP00000313950	9606.ENSP00000348838	0	0	0	0	0.934	0.064	0.9	0.597	0.997
AURKB	CDK1	9606.ENSP00000313950	9606.ENSP00000378699	0	0	0.422	0.726	0.963	0.399	0.9	0.852	0.998
AURKB	CENPA	9606.ENSP00000313950	9606.ENSP00000336868	0	0	0	0	0.807	0.542	0.9	0.842	0.998
AURKB	CDCA8	9606.ENSP00000313950	9606.ENSP00000362146	0	0	0	0	0.97	0.379	0.9	0.967	0.999
AURKB	KIF20A	9606.ENSP00000313950	9606.ENSP00000378356	0	0	0	0	0.932	0.433	0.9	0.792	0.999
AURKB	CDC20	9606.ENSP00000313950	9606.ENSP00000361540	0	0	0	0	0.972	0.379	0.9	0.791	0.999
AURKB	KIF2C	9606.ENSP00000313950	9606.ENSP00000361298	0	0	0	0	0.913	0.125	0.9	0.915	0.999
B3GALT1	FUT2	9606.ENSP00000376456	9606.ENSP00000387498	0	0	0	0	0.045	0	0.9	0.487	0.946
BAGE5	MAGEA1	9606.ENSP00000485185	9606.ENSP00000349085	0	0	0	0	0	0	0	0.905	0.905
BAGE5	GAGE2A	9606.ENSP00000485185	9606.ENSP00000355421	0	0	0	0	0.062	0	0	0.904	0.906
BAGE5	GAGE1	9606.ENSP00000485185	9606.ENSP00000484668	0	0	0	0	0	0	0	0.905	0.905
BCAN	MMP13	9606.ENSP00000331210	9606.ENSP00000260302	0	0	0	0	0	0.328	0.9	0.174	0.939
BCAN	MMP10	9606.ENSP00000331210	9606.ENSP00000279441	0	0	0	0	0	0.328	0.9	0.088	0.933
BCAN	GPC2	9606.ENSP00000331210	9606.ENSP00000292377	0	0	0	0	0	0	0.9	0.418	0.939
BCAN	CSPG4	9606.ENSP00000331210	9606.ENSP00000312506	0	0	0	0	0.088	0	0.9	0.675	0.967
BCAN	MMP1	9606.ENSP00000331210	9606.ENSP00000322788	0	0	0	0	0	0.328	0.9	0.134	0.936
BCAN	GPC3	9606.ENSP00000331210	9606.ENSP00000377836	0	0	0	0	0.061	0	0.9	0.297	0.928
BCAN	CSPG5	9606.ENSP00000331210	9606.ENSP00000373244	0	0	0	0	0.341	0	0.9	0.485	0.963
BDKRB1	DRD4	9606.ENSP00000216629	9606.ENSP00000176183	0	0	0	0	0	0	0.9	0.148	0.911
BDKRB1	KISS1R	9606.ENSP00000216629	9606.ENSP00000234371	0	0	0	0.645	0	0	0.9	0	0.9
BDKRB1	OPRK1	9606.ENSP00000216629	9606.ENSP00000265572	0	0	0	0.719	0	0	0.9	0.066	0.9
BDKRB1	RXFP4	9606.ENSP00000216629	9606.ENSP00000357301	0	0	0	0.674	0	0	0.9	0.046	0.9
BDKRB1	SST	9606.ENSP00000216629	9606.ENSP00000287641	0	0	0	0	0	0	0.9	0	0.9
BDKRB1	GAL	9606.ENSP00000216629	9606.ENSP00000265643	0	0	0	0	0	0	0.9	0	0.9
BDKRB1	MTNR1B	9606.ENSP00000216629	9606.ENSP00000257068	0	0	0	0.616	0	0	0.9	0	0.9
BDKRB1	HTR1F	9606.ENSP00000216629	9606.ENSP00000322924	0	0	0	0.588	0	0	0.9	0	0.9
BDKRB1	CCL25	9606.ENSP00000216629	9606.ENSP00000375086	0	0	0	0	0	0.05	0.9	0	0.9
BDKRB1	NPFFR2	9606.ENSP00000216629	9606.ENSP00000307822	0	0	0	0.612	0	0	0.9	0	0.9
BDKRB1	HTR1D	9606.ENSP00000216629	9606.ENSP00000363748	0	0	0	0.574	0	0	0.9	0	0.9
BDKRB1	HTR2C	9606.ENSP00000216629	9606.ENSP00000276198	0	0	0	0.572	0	0	0.9	0	0.9
BDKRB1	SSTR3	9606.ENSP00000216629	9606.ENSP00000480971	0	0	0	0.717	0	0	0.9	0.059	0.9
BDKRB1	CCR3	9606.ENSP00000216629	9606.ENSP00000441600	0	0	0	0.725	0	0	0.9	0.058	0.9
BDKRB1	MLN	9606.ENSP00000216629	9606.ENSP00000388825	0	0	0	0	0	0	0.9	0	0.9
BDKRB1	OPN4	9606.ENSP00000216629	9606.ENSP00000361141	0	0	0	0.59	0	0	0.9	0	0.9
BDKRB1	LPAR4	9606.ENSP00000216629	9606.ENSP00000408205	0	0	0	0.713	0	0	0.9	0	0.9
BDKRB1	GABBR2	9606.ENSP00000216629	9606.ENSP00000259455	0	0	0	0	0	0	0.9	0	0.9
BDKRB1	P2RY4	9606.ENSP00000216629	9606.ENSP00000363643	0	0	0	0.633	0	0	0.9	0	0.9
BDKRB1	PPY	9606.ENSP00000216629	9606.ENSP00000466009	0	0	0	0	0	0	0.9	0	0.9
BDKRB1	HCAR1	9606.ENSP00000216629	9606.ENSP00000389255	0	0	0	0.657	0	0	0.9	0	0.9
BDKRB1	RLN3	9606.ENSP00000216629	9606.ENSP00000397415	0	0	0	0	0	0	0.9	0	0.9
BDKRB1	NTSR2	9606.ENSP00000216629	9606.ENSP00000303686	0	0	0	0	0	0	0.9	0	0.9
BDKRB1	UTS2R	9606.ENSP00000216629	9606.ENSP00000323516	0	0	0	0.604	0	0	0.9	0	0.9
BDKRB1	QRFPR	9606.ENSP00000216629	9606.ENSP00000377948	0	0	0	0.62	0	0	0.9	0.041	0.9
BDKRB1	GPRC6A	9606.ENSP00000216629	9606.ENSP00000309493	0	0	0	0	0	0.057	0.9	0	0.901
BDKRB1	GRM4	9606.ENSP00000216629	9606.ENSP00000440556	0	0	0	0	0	0.057	0.9	0	0.901
BDKRB1	BRS3	9606.ENSP00000216629	9606.ENSP00000359682	0	0	0	0.605	0	0	0.9	0.07	0.901
BDKRB1	GRM5	9606.ENSP00000216629	9606.ENSP00000306138	0	0	0	0	0	0.057	0.9	0	0.901
BDKRB1	SSTR5	9606.ENSP00000216629	9606.ENSP00000293897	0	0	0	0.718	0	0	0.9	0.111	0.902
BDKRB1	PTGFR	9606.ENSP00000216629	9606.ENSP00000359793	0	0	0	0	0.062	0	0.9	0	0.902
BDKRB1	GRPR	9606.ENSP00000216629	9606.ENSP00000369643	0	0	0	0.616	0	0	0.9	0.102	0.902
BDKRB1	F2RL3	9606.ENSP00000216629	9606.ENSP00000248076	0	0	0	0.647	0	0	0.9	0.12	0.902
BDKRB1	GCG	9606.ENSP00000216629	9606.ENSP00000387662	0	0	0	0	0.061	0	0.9	0.046	0.902
BDKRB1	TAC3	9606.ENSP00000216629	9606.ENSP00000483110	0	0	0	0	0	0	0.9	0.062	0.902
BDKRB1	GRP	9606.ENSP00000216629	9606.ENSP00000256857	0	0	0	0	0	0	0.9	0.073	0.903
BDKRB1	PROK1	9606.ENSP00000216629	9606.ENSP00000271331	0	0	0	0	0	0	0.9	0.086	0.904
BDKRB1	CCKBR	9606.ENSP00000216629	9606.ENSP00000335544	0	0	0	0.588	0	0	0.9	0.179	0.905
BDKRB1	LPAR3	9606.ENSP00000216629	9606.ENSP00000395389	0	0	0	0	0	0	0.9	0.09	0.905
BDKRB1	TACR1	9606.ENSP00000216629	9606.ENSP00000303522	0	0	0	0.621	0	0	0.9	0.198	0.906
BDKRB1	CHRM1	9606.ENSP00000216629	9606.ENSP00000306490	0	0	0	0	0	0	0.9	0.111	0.907
BDKRB1	GAST	9606.ENSP00000216629	9606.ENSP00000331358	0	0	0	0	0	0	0.9	0.11	0.907
BDKRB1	GNGT1	9606.ENSP00000216629	9606.ENSP00000248572	0	0	0	0	0	0.165	0.9	0	0.912
BDKRB1	CXCL5	9606.ENSP00000216629	9606.ENSP00000296027	0	0	0	0	0.062	0	0.9	0.146	0.912
BDKRB1	EDN3	9606.ENSP00000216629	9606.ENSP00000337128	0	0	0	0	0	0.157	0.9	0.072	0.914
BDKRB1	CNR1	9606.ENSP00000216629	9606.ENSP00000358513	0	0	0	0	0	0	0.9	0.187	0.915
BDKRB1	HTR1B	9606.ENSP00000216629	9606.ENSP00000358963	0	0	0	0	0	0	0.9	0.194	0.916
BDKRB1	NMB	9606.ENSP00000216629	9606.ENSP00000378089	0	0	0	0	0	0	0.9	0.251	0.921
BDKRB1	NTS	9606.ENSP00000216629	9606.ENSP00000256010	0	0	0	0	0	0.263	0.9	0	0.923
BDKRB1	GNG4	9606.ENSP00000216629	9606.ENSP00000375727	0	0	0	0	0	0.165	0.9	0.246	0.931
BIRC5	CENPM	9606.ENSP00000301633	9606.ENSP00000215980	0	0	0	0	0.797	0	0.9	0.252	0.983
BIRC5	DLGAP5	9606.ENSP00000301633	9606.ENSP00000247191	0	0	0	0	0.913	0	0	0.44	0.949
BIRC5	NCAPG	9606.ENSP00000301633	9606.ENSP00000251496	0	0	0	0	0.891	0.262	0	0.358	0.944
BIRC5	CCNB1	9606.ENSP00000301633	9606.ENSP00000256442	0	0	0	0	0.888	0.185	0.9	0.651	0.996
BIRC5	KIF23	9606.ENSP00000301633	9606.ENSP00000260363	0	0	0	0	0.728	0	0.9	0.451	0.983
BIRC5	KIF11	9606.ENSP00000301633	9606.ENSP00000260731	0	0	0	0	0.94	0.052	0	0.451	0.966
BIRC5	NDC80	9606.ENSP00000301633	9606.ENSP00000261597	0	0	0	0	0.926	0	0.9	0.325	0.994
BIRC5	KIF18A	9606.ENSP00000301633	9606.ENSP00000263181	0	0	0	0	0.441	0.05	0.9	0.208	0.952
BIRC5	SGOL1	9606.ENSP00000301633	9606.ENSP00000263753	0	0	0	0	0.728	0	0.9	0.326	0.98
BIRC5	CENPE	9606.ENSP00000301633	9606.ENSP00000265148	0	0	0	0	0.768	0.05	0.9	0.406	0.985
BIRC5	NUF2	9606.ENSP00000301633	9606.ENSP00000271452	0	0	0	0	0.85	0	0.9	0.376	0.989
BIRC5	CCNA2	9606.ENSP00000301633	9606.ENSP00000274026	0	0	0	0	0.921	0.157	0	0.522	0.965
BIRC5	CDCA5	9606.ENSP00000301633	9606.ENSP00000275517	0	0	0	0	0.881	0	0.9	0.365	0.991
BIRC5	CENPU	9606.ENSP00000301633	9606.ENSP00000281453	0	0	0	0	0.609	0	0.9	0.165	0.964
BIRC5	SPC25	9606.ENSP00000301633	9606.ENSP00000282074	0	0	0	0	0.746	0	0.9	0.086	0.974
BIRC5	SKA1	9606.ENSP00000301633	9606.ENSP00000285116	0	0	0	0	0.58	0	0.9	0.311	0.968
BIRC5	BUB1B	9606.ENSP00000301633	9606.ENSP00000287598	0	0	0	0	0.916	0.185	0.9	0.554	0.996
BIRC5	CCNB2	9606.ENSP00000301633	9606.ENSP00000288207	0	0	0	0	0.88	0.185	0.9	0.577	0.995
BIRC5	MAD2L1	9606.ENSP00000301633	9606.ENSP00000296509	0	0	0	0	0.958	0	0.9	0.578	0.998
BIRC5	MELK	9606.ENSP00000301633	9606.ENSP00000298048	0	0	0	0	0.896	0.085	0	0.413	0.939
BIRC5	KIAA0101	9606.ENSP00000301633	9606.ENSP00000300035	0	0	0	0	0.893	0	0	0.203	0.911
BIRC5	PLK1	9606.ENSP00000301633	9606.ENSP00000300093	0	0	0	0	0.821	0	0.9	0.557	0.991
BIRC5	TPX2	9606.ENSP00000301633	9606.ENSP00000300403	0	0	0	0	0.932	0	0	0.47	0.962
BIRC5	CEP55	9606.ENSP00000301633	9606.ENSP00000360540	0	0	0	0	0.834	0	0	0.443	0.903
BIRC5	DYNC1I1	9606.ENSP00000301633	9606.ENSP00000320130	0	0	0	0	0	0	0.9	0.104	0.906
BIRC5	HJURP	9606.ENSP00000301633	9606.ENSP00000414109	0	0	0	0	0.887	0	0	0.211	0.907
BIRC5	FOXM1	9606.ENSP00000301633	9606.ENSP00000342307	0	0	0	0	0.809	0	0	0.556	0.911
BIRC5	CENPL	9606.ENSP00000301633	9606.ENSP00000348527	0	0	0	0	0.143	0	0.9	0.076	0.913
BIRC5	MKI67	9606.ENSP00000301633	9606.ENSP00000357643	0	0	0	0	0.841	0	0	0.589	0.932
BIRC5	SGOL2	9606.ENSP00000301633	9606.ENSP00000350447	0	0	0	0	0.352	0	0.9	0.116	0.937
BIRC5	CDCA3	9606.ENSP00000301633	9606.ENSP00000442068	0	0	0	0	0.902	0	0	0.397	0.938
BIRC5	RRM2	9606.ENSP00000301633	9606.ENSP00000353770	0	0	0	0	0.884	0	0	0.491	0.938
BIRC5	CENPI	9606.ENSP00000301633	9606.ENSP00000362018	0	0	0	0	0.401	0	0.9	0.076	0.939
BIRC5	TK1	9606.ENSP00000301633	9606.ENSP00000301634	0	0	0	0	0.892	0	0	0.46	0.939
BIRC5	NEK2	9606.ENSP00000301633	9606.ENSP00000355966	0	0	0	0	0.893	0	0	0.479	0.942
BIRC5	PTTG1	9606.ENSP00000301633	9606.ENSP00000377536	0	0	0	0	0.902	0	0	0.476	0.946
BIRC5	KIF4A	9606.ENSP00000301633	9606.ENSP00000363524	0	0	0	0	0.907	0	0	0.471	0.948
BIRC5	TOP2A	9606.ENSP00000301633	9606.ENSP00000411532	0	0	0	0	0.883	0	0	0.589	0.95
BIRC5	TTK	9606.ENSP00000301633	9606.ENSP00000358813	0	0	0	0	0.918	0	0	0.416	0.95
BIRC5	ERCC6L	9606.ENSP00000301633	9606.ENSP00000334675	0	0	0	0	0.481	0	0.9	0.166	0.952
BIRC5	NUSAP1	9606.ENSP00000301633	9606.ENSP00000453403	0	0	0	0	0.91	0	0	0.517	0.954
BIRC5	CENPK	9606.ENSP00000301633	9606.ENSP00000379911	0	0	0	0	0.521	0	0.9	0.193	0.957
BIRC5	PBK	9606.ENSP00000301633	9606.ENSP00000428489	0	0	0	0	0.952	0.176	0	0.416	0.974
BIRC5	SPC24	9606.ENSP00000301633	9606.ENSP00000465075	0	0	0	0	0.654	0	0.9	0.333	0.974
BIRC5	UBE2C	9606.ENSP00000301633	9606.ENSP00000348838	0	0	0	0	0.956	0.193	0	0.579	0.983
BIRC5	RACGAP1	9606.ENSP00000301633	9606.ENSP00000404190	0	0	0	0	0.783	0	0.9	0.418	0.986
BIRC5	ZWINT	9606.ENSP00000301633	9606.ENSP00000363055	0	0	0	0	0.78	0	0.9	0.419	0.986
BIRC5	CENPA	9606.ENSP00000301633	9606.ENSP00000336868	0	0	0	0	0.782	0.097	0.9	0.471	0.988
BIRC5	CENPF	9606.ENSP00000301633	9606.ENSP00000355922	0	0	0	0	0.809	0	0.9	0.548	0.99
BIRC5	KIF20A	9606.ENSP00000301633	9606.ENSP00000378356	0	0	0	0	0.875	0	0.9	0.443	0.992
BIRC5	KIF2C	9606.ENSP00000301633	9606.ENSP00000361298	0	0	0	0	0.872	0	0.9	0.447	0.992
BIRC5	BUB1	9606.ENSP00000301633	9606.ENSP00000302530	0	0	0	0	0.901	0.185	0.9	0.592	0.996
BIRC5	CDK1	9606.ENSP00000301633	9606.ENSP00000378699	0	0	0	0	0.967	0.379	0.9	0.526	0.998
BIRC5	CDC20	9606.ENSP00000301633	9606.ENSP00000361540	0	0	0	0	0.965	0.064	0.9	0.61	0.998
BIRC5	CDCA8	9606.ENSP00000301633	9606.ENSP00000362146	0	0	0	0	0.948	0.873	0.9	0.608	0.999
BLM	DMC1	9606.ENSP00000347232	9606.ENSP00000216024	0	0	0	0	0.064	0.265	0.9	0.331	0.947
BLM	RAD51AP1	9606.ENSP00000347232	9606.ENSP00000228843	0	0	0	0	0.564	0	0.9	0.051	0.955
BLM	MSH4	9606.ENSP00000347232	9606.ENSP00000263187	0.051	0	0	0	0.08	0.188	0.9	0.641	0.969
BLM	FANCD2	9606.ENSP00000347232	9606.ENSP00000287647	0	0	0	0	0.345	0.596	0	0.67	0.905
BLM	CLSPN	9606.ENSP00000347232	9606.ENSP00000312995	0	0	0	0	0.268	0	0.9	0.24	0.939
BLM	ERCC6L	9606.ENSP00000347232	9606.ENSP00000334675	0.046	0	0	0	0.278	0.939	0	0.439	0.973
BLM	HIST1H2BL	9606.ENSP00000347232	9606.ENSP00000366618	0	0	0	0	0.069	0.085	0.9	0.043	0.907
BLM	HIST1H2BH	9606.ENSP00000347232	9606.ENSP00000479169	0	0	0	0	0.069	0.085	0.9	0.043	0.907
BLM	UBE2T	9606.ENSP00000347232	9606.ENSP00000356243	0	0	0	0	0.228	0.105	0.9	0.116	0.93
BLM	FANCB	9606.ENSP00000347232	9606.ENSP00000381378	0	0	0	0	0.17	0	0.9	0.337	0.94
BLM	RAD54L	9606.ENSP00000347232	9606.ENSP00000361043	0.046	0	0	0	0.578	0.671	0	0.625	0.943
BLM	XRCC2	9606.ENSP00000347232	9606.ENSP00000352271	0	0	0	0	0.109	0.305	0.9	0.299	0.95
BLM	MSH5	9606.ENSP00000347232	9606.ENSP00000364855	0.051	0	0	0	0.086	0.188	0.9	0.62	0.968
BLM	EME1	9606.ENSP00000347232	9606.ENSP00000376952	0	0	0	0	0.203	0.33	0.9	0.778	0.986
BLM	RAD51	9606.ENSP00000347232	9606.ENSP00000372088	0	0	0	0	0.517	0.826	0.9	0.838	0.998
BLM	EXO1	9606.ENSP00000347232	9606.ENSP00000355506	0.056	0	0	0	0.698	0.769	0.9	0.825	0.998
BMP7	SOSTDC1	9606.ENSP00000379204	9606.ENSP00000304930	0	0	0	0	0.069	0.379	0.9	0.904	0.993
BMP7	NKX2-5	9606.ENSP00000379204	9606.ENSP00000327758	0	0	0	0	0	0.064	0.9	0.236	0.922
BPIFB2	TMEM132A	9606.ENSP00000170150	9606.ENSP00000005286	0	0	0	0	0	0	0.9	0.114	0.907
BPIFB2	CHGB	9606.ENSP00000170150	9606.ENSP00000368244	0	0	0	0	0	0	0.9	0	0.9
BPIFB2	SCG3	9606.ENSP00000170150	9606.ENSP00000220478	0	0	0	0	0	0	0.9	0	0.9
BPIFB2	VGF	9606.ENSP00000170150	9606.ENSP00000249330	0	0	0	0	0	0	0.9	0	0.9
BPIFB2	SCG2	9606.ENSP00000170150	9606.ENSP00000304133	0	0	0	0	0	0	0.9	0	0.9
BPIFB2	SPARCL1	9606.ENSP00000170150	9606.ENSP00000414856	0	0	0	0	0.055	0	0.9	0.053	0.902
BPIFB2	SPP1	9606.ENSP00000170150	9606.ENSP00000378517	0	0	0	0	0.064	0	0.9	0.05	0.903
BPIFB2	MSLN	9606.ENSP00000170150	9606.ENSP00000372313	0	0	0	0	0.065	0	0.9	0.085	0.906
BPIFB2	MATN3	9606.ENSP00000170150	9606.ENSP00000383894	0	0	0	0	0.117	0	0.9	0	0.907
BPIFB2	MEPE	9606.ENSP00000170150	9606.ENSP00000416984	0	0	0	0	0	0	0.9	0.168	0.913
BPIFB2	STC2	9606.ENSP00000170150	9606.ENSP00000265087	0	0	0	0	0.087	0	0.9	0.179	0.918
BPIFB2	GPC3	9606.ENSP00000170150	9606.ENSP00000377836	0	0	0	0	0.214	0	0.9	0.1	0.923
BPIFB2	NOTUM	9606.ENSP00000170150	9606.ENSP00000387310	0	0	0	0	0.299	0	0.9	0	0.926
BRS3	KISS1R	9606.ENSP00000359682	9606.ENSP00000234371	0	0	0	0.671	0.081	0	0.9	0.077	0.905
BRS3	F2RL3	9606.ENSP00000359682	9606.ENSP00000248076	0	0	0	0.616	0.052	0	0.9	0	0.901
BRS3	GNGT1	9606.ENSP00000359682	9606.ENSP00000248572	0	0	0	0	0	0.165	0.9	0	0.912
BRS3	NTS	9606.ENSP00000359682	9606.ENSP00000256010	0	0	0	0	0.061	0.263	0.9	0.298	0.944
BRS3	GRP	9606.ENSP00000359682	9606.ENSP00000256857	0	0	0	0	0.05	0	0.9	0.921	0.991
BRS3	PROK1	9606.ENSP00000359682	9606.ENSP00000271331	0	0	0	0	0	0	0.9	0	0.9
BRS3	HTR2C	9606.ENSP00000359682	9606.ENSP00000276198	0	0	0	0.586	0.085	0	0.9	0.1	0.907
BRS3	TACR1	9606.ENSP00000359682	9606.ENSP00000303522	0	0	0	0.697	0.061	0	0.9	0.304	0.91
BRS3	NTSR2	9606.ENSP00000359682	9606.ENSP00000303686	0	0	0	0.599	0.061	0	0.9	0.257	0.91
BRS3	GRM5	9606.ENSP00000359682	9606.ENSP00000306138	0	0	0	0	0.129	0.057	0.9	0.051	0.911
BRS3	CHRM1	9606.ENSP00000359682	9606.ENSP00000306490	0	0	0	0.573	0.064	0	0.9	0.165	0.907
BRS3	NPFFR2	9606.ENSP00000359682	9606.ENSP00000307822	0	0	0	0.69	0.062	0	0.9	0.267	0.909
BRS3	GPRC6A	9606.ENSP00000359682	9606.ENSP00000309493	0	0	0	0	0	0.057	0.9	0.135	0.911
BRS3	UTS2R	9606.ENSP00000359682	9606.ENSP00000323516	0	0	0	0.653	0	0	0.9	0.201	0.905
BRS3	GAST	9606.ENSP00000359682	9606.ENSP00000331358	0	0	0	0	0	0	0.9	0.511	0.949
BRS3	CCKBR	9606.ENSP00000359682	9606.ENSP00000335544	0	0	0	0.662	0	0	0.9	0.348	0.91
BRS3	EDN3	9606.ENSP00000359682	9606.ENSP00000337128	0	0	0	0	0	0.157	0.9	0.063	0.914
BRS3	OPN4	9606.ENSP00000359682	9606.ENSP00000361141	0	0	0	0.606	0	0	0.9	0	0.9
BRS3	PTGFR	9606.ENSP00000359682	9606.ENSP00000359793	0	0	0	0	0	0	0.9	0.066	0.902
BRS3	LPAR3	9606.ENSP00000359682	9606.ENSP00000395389	0	0	0	0	0	0	0.9	0.071	0.903
BRS3	TAC3	9606.ENSP00000359682	9606.ENSP00000483110	0	0	0	0	0.061	0	0.9	0.051	0.903
BRS3	LPAR4	9606.ENSP00000359682	9606.ENSP00000408205	0	0	0	0.634	0.08	0	0.9	0	0.904
BRS3	QRFPR	9606.ENSP00000359682	9606.ENSP00000377948	0	0	0	0.699	0.059	0	0.9	0.216	0.907
BRS3	MLN	9606.ENSP00000359682	9606.ENSP00000388825	0	0	0	0	0.062	0	0.9	0.121	0.91
BRS3	GRPR	9606.ENSP00000359682	9606.ENSP00000369643	0	0	0	0.942	0.105	0	0.9	0.831	0.911
BRS3	GNG4	9606.ENSP00000359682	9606.ENSP00000375727	0	0	0	0	0.061	0.165	0.9	0	0.914
BRS3	GCG	9606.ENSP00000359682	9606.ENSP00000387662	0	0	0	0	0.064	0	0.9	0.202	0.918
BRS3	NMB	9606.ENSP00000359682	9606.ENSP00000378089	0	0	0	0	0	0	0.9	0.912	0.99
BRSK2	MAPT	9606.ENSP00000371614	9606.ENSP00000340820	0	0	0	0	0.218	0	0.9	0.323	0.942
BSND	CLCNKA	9606.ENSP00000360312	9606.ENSP00000332771	0	0	0	0	0.071	0	0.9	0.923	0.992
BUB1	CDC6	9606.ENSP00000302530	9606.ENSP00000209728	0	0	0	0	0.871	0.177	0	0.633	0.957
BUB1	CENPM	9606.ENSP00000302530	9606.ENSP00000215980	0	0	0	0	0.74	0	0.9	0.24	0.978
BUB1	OIP5	9606.ENSP00000302530	9606.ENSP00000220514	0	0	0	0	0.9	0	0	0.17	0.913
BUB1	NCAPH	9606.ENSP00000302530	9606.ENSP00000240423	0	0	0	0	0.906	0	0	0.449	0.946
BUB1	DLGAP5	9606.ENSP00000302530	9606.ENSP00000247191	0	0	0	0	0.972	0	0	0.793	0.994
BUB1	NCAPG	9606.ENSP00000302530	9606.ENSP00000251496	0	0	0	0	0.974	0	0	0.478	0.985
BUB1	CCNB1	9606.ENSP00000302530	9606.ENSP00000256442	0	0	0	0	0.902	0.085	0.9	0.793	0.997
BUB1	KIF23	9606.ENSP00000302530	9606.ENSP00000260363	0	0	0	0	0.972	0.185	0	0.496	0.987
BUB1	KIF11	9606.ENSP00000302530	9606.ENSP00000260731	0	0	0	0	0.99	0.185	0	0.672	0.997
BUB1	NDC80	9606.ENSP00000302530	9606.ENSP00000261597	0	0	0	0	0.969	0.945	0.9	0.838	0.999
BUB1	KIF18A	9606.ENSP00000302530	9606.ENSP00000263181	0	0	0	0	0.812	0.298	0.9	0.479	0.992
BUB1	SGOL1	9606.ENSP00000302530	9606.ENSP00000263753	0	0	0	0	0.856	0.05	0.9	0.827	0.997
BUB1	CENPE	9606.ENSP00000302530	9606.ENSP00000265148	0	0	0	0	0.941	0.525	0.9	0.87	0.999
BUB1	PLK4	9606.ENSP00000302530	9606.ENSP00000270861	0	0	0	0	0.844	0.247	0	0.531	0.94
BUB1	NUF2	9606.ENSP00000302530	9606.ENSP00000271452	0	0	0	0	0.891	0.939	0.9	0.777	0.999
BUB1	CCNA2	9606.ENSP00000302530	9606.ENSP00000274026	0	0	0	0	0.97	0.079	0	0.698	0.99
BUB1	CDCA5	9606.ENSP00000302530	9606.ENSP00000275517	0	0	0	0	0.834	0	0.9	0.479	0.99
BUB1	CENPU	9606.ENSP00000302530	9606.ENSP00000281453	0	0	0	0	0.787	0	0.9	0.5	0.988
BUB1	SPC25	9606.ENSP00000302530	9606.ENSP00000282074	0	0	0	0	0.662	0.929	0.9	0.149	0.997
BUB1	SKA1	9606.ENSP00000302530	9606.ENSP00000285116	0	0	0	0	0.706	0	0.9	0.539	0.985
BUB1	BUB1B	9606.ENSP00000302530	9606.ENSP00000287598	0	0	0	0.582	0.918	0.929	0.9	0.896	0.999
BUB1	CCNB2	9606.ENSP00000302530	9606.ENSP00000288207	0	0	0	0	0.974	0.085	0.9	0.793	0.999
BUB1	MAD2L1	9606.ENSP00000302530	9606.ENSP00000296509	0	0	0	0	0.921	0.998	0.9	0.858	0.999
BUB1	MELK	9606.ENSP00000302530	9606.ENSP00000298048	0	0	0	0	0.95	0.056	0	0.535	0.976
BUB1	KIAA0101	9606.ENSP00000302530	9606.ENSP00000300035	0	0	0	0	0.923	0	0	0.118	0.929
BUB1	PLK1	9606.ENSP00000302530	9606.ENSP00000300093	0	0	0	0	0.908	0.593	0.9	0.92	0.999
BUB1	TPX2	9606.ENSP00000302530	9606.ENSP00000300403	0	0	0	0	0.974	0	0	0.518	0.987
BUB1	DYNC1I1	9606.ENSP00000302530	9606.ENSP00000320130	0	0	0	0	0	0	0.9	0.054	0.901
BUB1	KIF14	9606.ENSP00000302530	9606.ENSP00000356319	0	0	0	0	0.809	0.185	0	0.414	0.901
BUB1	DSCC1	9606.ENSP00000302530	9606.ENSP00000322180	0	0	0	0	0.874	0.08	0	0.242	0.904
BUB1	FOXM1	9606.ENSP00000302530	9606.ENSP00000342307	0	0	0	0	0.84	0.085	0	0.458	0.914
BUB1	CDC25C	9606.ENSP00000302530	9606.ENSP00000321656	0	0	0	0	0.8	0	0	0.593	0.915
BUB1	CDCA3	9606.ENSP00000302530	9606.ENSP00000442068	0	0	0	0	0.89	0	0	0.343	0.924
BUB1	TP73	9606.ENSP00000302530	9606.ENSP00000367545	0	0	0	0	0	0	0.9	0.309	0.927
BUB1	CENPL	9606.ENSP00000302530	9606.ENSP00000348527	0	0	0	0	0.159	0	0.9	0.215	0.928
BUB1	CDKN3	9606.ENSP00000302530	9606.ENSP00000335357	0	0	0	0	0.903	0.058	0	0.278	0.928
BUB1	HJURP	9606.ENSP00000302530	9606.ENSP00000414109	0	0	0	0	0.918	0	0	0.315	0.941
BUB1	RRM2	9606.ENSP00000302530	9606.ENSP00000353770	0	0	0	0	0.913	0	0	0.424	0.948
BUB1	CDC45	9606.ENSP00000302530	9606.ENSP00000405726	0	0	0	0	0.915	0.062	0	0.443	0.952
BUB1	KIF15	9606.ENSP00000302530	9606.ENSP00000324020	0	0	0	0	0.906	0.185	0	0.437	0.953
BUB1	SKA3	9606.ENSP00000302530	9606.ENSP00000319417	0	0	0	0	0.752	0	0.72	0.396	0.954
BUB1	PTTG1	9606.ENSP00000302530	9606.ENSP00000377536	0	0	0	0	0.85	0	0	0.724	0.957
BUB1	KIFC1	9606.ENSP00000302530	9606.ENSP00000393963	0	0	0	0	0.898	0.185	0	0.536	0.958
BUB1	CEP55	9606.ENSP00000302530	9606.ENSP00000360540	0	0	0	0	0.932	0	0	0.443	0.96
BUB1	PRC1	9606.ENSP00000302530	9606.ENSP00000377793	0	0	0	0	0.922	0.192	0	0.458	0.963
BUB1	NUSAP1	9606.ENSP00000302530	9606.ENSP00000453403	0	0	0	0	0.93	0	0	0.539	0.966
BUB1	RACGAP1	9606.ENSP00000302530	9606.ENSP00000404190	0	0	0	0	0.956	0	0	0.297	0.968
BUB1	PBK	9606.ENSP00000302530	9606.ENSP00000428489	0	0	0	0	0.945	0.064	0	0.44	0.968
BUB1	UBE2C	9606.ENSP00000302530	9606.ENSP00000348838	0	0	0	0	0.938	0	0	0.552	0.971
BUB1	ERCC6L	9606.ENSP00000302530	9606.ENSP00000334675	0	0	0	0	0.599	0.053	0.9	0.357	0.972
BUB1	NEK2	9606.ENSP00000302530	9606.ENSP00000355966	0	0	0	0	0.935	0	0	0.64	0.975
BUB1	MKI67	9606.ENSP00000302530	9606.ENSP00000357643	0	0	0	0	0.942	0	0	0.617	0.976
BUB1	CENPK	9606.ENSP00000302530	9606.ENSP00000379911	0	0	0	0	0.7	0	0.9	0.417	0.981
BUB1	HMMR	9606.ENSP00000302530	9606.ENSP00000377492	0	0	0	0	0.957	0	0	0.595	0.982
BUB1	CENPI	9606.ENSP00000302530	9606.ENSP00000362018	0	0	0	0	0.518	0	0.9	0.679	0.983
BUB1	KIF4A	9606.ENSP00000302530	9606.ENSP00000363524	0	0	0	0	0.959	0.185	0	0.537	0.983
BUB1	SGOL2	9606.ENSP00000302530	9606.ENSP00000350447	0	0	0	0	0.707	0	0.9	0.659	0.989
BUB1	KIF20A	9606.ENSP00000302530	9606.ENSP00000378356	0	0	0	0	0.975	0.185	0	0.528	0.989
BUB1	TOP2A	9606.ENSP00000302530	9606.ENSP00000411532	0	0	0	0	0.974	0.05	0	0.62	0.99
BUB1	CDCA8	9606.ENSP00000302530	9606.ENSP00000362146	0	0	0	0	0.935	0	0.9	0.707	0.997
BUB1	CENPA	9606.ENSP00000302530	9606.ENSP00000336868	0	0	0	0	0.896	0.262	0.9	0.702	0.997
BUB1	SPC24	9606.ENSP00000302530	9606.ENSP00000465075	0	0	0	0	0.341	0.929	0.9	0.608	0.997
BUB1	CENPF	9606.ENSP00000302530	9606.ENSP00000355922	0	0	0	0	0.938	0	0.9	0.732	0.998
BUB1	TTK	9606.ENSP00000302530	9606.ENSP00000358813	0	0	0	0	0.974	0.731	0	0.834	0.998
BUB1	KIF2C	9606.ENSP00000302530	9606.ENSP00000361298	0	0	0	0	0.945	0.185	0.9	0.699	0.998
BUB1	CDK1	9606.ENSP00000302530	9606.ENSP00000378699	0	0	0	0	0.988	0.575	0.9	0.917	0.999
BUB1	CDC20	9606.ENSP00000302530	9606.ENSP00000361540	0	0	0	0	0.968	0.998	0.9	0.959	0.999
BUB1	ZWINT	9606.ENSP00000302530	9606.ENSP00000363055	0	0	0	0	0.728	0.929	0.9	0.669	0.999
BUB1B	TRIP13	9606.ENSP00000287598	9606.ENSP00000166345	0	0	0	0	0.805	0.336	0	0.429	0.919
BUB1B	CDC6	9606.ENSP00000287598	9606.ENSP00000209728	0	0	0	0	0.806	0.177	0	0.571	0.925
BUB1B	CENPM	9606.ENSP00000287598	9606.ENSP00000215980	0	0	0	0	0.626	0.135	0.9	0.242	0.972
BUB1B	NCAPH	9606.ENSP00000287598	9606.ENSP00000240423	0	0	0	0	0.843	0	0	0.386	0.9
BUB1B	DLGAP5	9606.ENSP00000287598	9606.ENSP00000247191	0	0	0	0	0.945	0	0	0.597	0.977
BUB1B	NCAPG	9606.ENSP00000287598	9606.ENSP00000251496	0	0	0	0	0.899	0	0	0.286	0.925
BUB1B	CCNB1	9606.ENSP00000287598	9606.ENSP00000256442	0	0	0	0	0.941	0.085	0.9	0.781	0.998
BUB1B	KIF23	9606.ENSP00000287598	9606.ENSP00000260363	0	0	0	0	0.891	0.185	0	0.375	0.94
BUB1B	KIF11	9606.ENSP00000287598	9606.ENSP00000260731	0	0	0	0	0.963	0.185	0	0.727	0.991
BUB1B	NDC80	9606.ENSP00000287598	9606.ENSP00000261597	0	0	0	0	0.926	0.399	0.9	0.846	0.999
BUB1B	KIF18A	9606.ENSP00000287598	9606.ENSP00000263181	0	0	0	0	0.697	0.298	0.9	0.685	0.992
BUB1B	SGOL1	9606.ENSP00000287598	9606.ENSP00000263753	0	0	0	0	0.867	0.384	0.9	0.685	0.997
BUB1B	CENPE	9606.ENSP00000287598	9606.ENSP00000265148	0	0	0	0	0.919	0.525	0.9	0.921	0.999
BUB1B	PLK4	9606.ENSP00000287598	9606.ENSP00000270861	0	0	0	0	0.75	0.247	0	0.572	0.912
BUB1B	NUF2	9606.ENSP00000287598	9606.ENSP00000271452	0	0	0	0	0.798	0.326	0.9	0.745	0.996
BUB1B	CCNA2	9606.ENSP00000287598	9606.ENSP00000274026	0	0	0	0	0.934	0.993	0.9	0.689	0.999
BUB1B	CDCA5	9606.ENSP00000287598	9606.ENSP00000275517	0	0	0	0	0.774	0	0.9	0.411	0.985
BUB1B	CENPU	9606.ENSP00000287598	9606.ENSP00000281453	0	0	0	0	0.783	0	0.9	0.499	0.988
BUB1B	SPC25	9606.ENSP00000287598	9606.ENSP00000282074	0	0	0	0	0.789	0	0.9	0.126	0.98
BUB1B	SKA1	9606.ENSP00000287598	9606.ENSP00000285116	0	0	0	0	0.71	0	0.9	0.539	0.985
BUB1B	PSMA8	9606.ENSP00000287598	9606.ENSP00000311121	0	0	0	0	0	0	0.9	0	0.9
BUB1B	KIF18B	9606.ENSP00000287598	9606.ENSP00000465992	0	0	0	0	0.825	0.298	0	0.266	0.902
BUB1B	DYNC1I1	9606.ENSP00000287598	9606.ENSP00000320130	0	0	0	0	0	0	0.9	0.075	0.903
BUB1B	HJURP	9606.ENSP00000287598	9606.ENSP00000414109	0	0	0	0	0.887	0	0	0.243	0.911
BUB1B	CDCA3	9606.ENSP00000287598	9606.ENSP00000442068	0	0	0	0	0.877	0	0	0.392	0.922
BUB1B	E2F8	9606.ENSP00000287598	9606.ENSP00000481103	0	0	0	0	0.914	0	0	0.255	0.933
BUB1B	DEPDC1	9606.ENSP00000287598	9606.ENSP00000412292	0	0	0	0	0.916	0	0	0.246	0.934
BUB1B	KIAA0101	9606.ENSP00000287598	9606.ENSP00000300035	0	0	0	0	0.927	0	0	0.163	0.936
BUB1B	CENPL	9606.ENSP00000287598	9606.ENSP00000348527	0	0	0	0	0.175	0	0.9	0.29	0.936
BUB1B	FOXM1	9606.ENSP00000287598	9606.ENSP00000342307	0	0	0	0	0.816	0.085	0	0.665	0.938
BUB1B	MELK	9606.ENSP00000287598	9606.ENSP00000298048	0	0	0	0	0.907	0.056	0	0.446	0.947
BUB1B	TPX2	9606.ENSP00000287598	9606.ENSP00000300403	0	0	0	0	0.902	0	0	0.5	0.949
BUB1B	MKI67	9606.ENSP00000287598	9606.ENSP00000357643	0	0	0	0	0.92	0	0	0.406	0.951
BUB1B	KIF15	9606.ENSP00000287598	9606.ENSP00000324020	0	0	0	0	0.921	0.185	0	0.338	0.953
BUB1B	CEP55	9606.ENSP00000287598	9606.ENSP00000360540	0	0	0	0	0.921	0	0	0.443	0.954
BUB1B	RACGAP1	9606.ENSP00000287598	9606.ENSP00000404190	0	0	0	0	0.925	0	0	0.443	0.956
BUB1B	NUSAP1	9606.ENSP00000287598	9606.ENSP00000453403	0	0	0	0	0.924	0	0	0.51	0.961
BUB1B	PRC1	9606.ENSP00000287598	9606.ENSP00000377793	0	0	0	0	0.928	0.192	0	0.398	0.962
BUB1B	KIF4A	9606.ENSP00000287598	9606.ENSP00000363524	0	0	0	0	0.932	0.185	0	0.46	0.967
BUB1B	PBK	9606.ENSP00000287598	9606.ENSP00000428489	0	0	0	0	0.942	0.064	0	0.473	0.969
BUB1B	KIF20A	9606.ENSP00000287598	9606.ENSP00000378356	0	0	0	0	0.935	0.185	0	0.495	0.971
BUB1B	RRM2	9606.ENSP00000287598	9606.ENSP00000353770	0	0	0	0	0.948	0	0	0.47	0.971
BUB1B	CENPI	9606.ENSP00000287598	9606.ENSP00000362018	0	0	0	0	0.363	0	0.9	0.63	0.974
BUB1B	PTTG1	9606.ENSP00000287598	9606.ENSP00000377536	0	0	0	0	0.821	0.305	0	0.816	0.975
BUB1B	SGOL2	9606.ENSP00000287598	9606.ENSP00000350447	0	0	0	0	0.524	0	0.9	0.554	0.976
BUB1B	ERCC6L	9606.ENSP00000287598	9606.ENSP00000334675	0	0	0	0	0.678	0.053	0.9	0.325	0.976
BUB1B	SPC24	9606.ENSP00000287598	9606.ENSP00000465075	0	0	0	0	0.43	0	0.9	0.676	0.979
BUB1B	CENPK	9606.ENSP00000287598	9606.ENSP00000379911	0	0	0	0	0.439	0.535	0.9	0.383	0.981
BUB1B	TOP2A	9606.ENSP00000287598	9606.ENSP00000411532	0	0	0	0	0.963	0.05	0	0.556	0.983
BUB1B	SKA3	9606.ENSP00000287598	9606.ENSP00000319417	0	0	0	0	0.727	0.161	0.9	0.388	0.984
BUB1B	CENPA	9606.ENSP00000287598	9606.ENSP00000336868	0	0	0	0	0.788	0.262	0.9	0.701	0.994
BUB1B	TTK	9606.ENSP00000287598	9606.ENSP00000358813	0	0	0	0	0.91	0.731	0	0.831	0.995
BUB1B	CENPF	9606.ENSP00000287598	9606.ENSP00000355922	0	0	0	0	0.896	0	0.9	0.683	0.996
BUB1B	CDCA8	9606.ENSP00000287598	9606.ENSP00000362146	0	0	0	0	0.927	0	0.9	0.637	0.997
BUB1B	CCNB2	9606.ENSP00000287598	9606.ENSP00000288207	0	0	0	0	0.93	0.085	0.9	0.699	0.997
BUB1B	UBE2C	9606.ENSP00000287598	9606.ENSP00000348838	0	0	0	0	0.903	0.328	0.9	0.625	0.997
BUB1B	KIF2C	9606.ENSP00000287598	9606.ENSP00000361298	0	0	0	0	0.923	0.185	0.9	0.672	0.997
BUB1B	PLK1	9606.ENSP00000287598	9606.ENSP00000300093	0	0	0	0	0.67	0.534	0.9	0.924	0.998
BUB1B	CDK1	9606.ENSP00000287598	9606.ENSP00000378699	0	0	0	0	0.94	0.345	0.9	0.861	0.999
BUB1B	CDC20	9606.ENSP00000287598	9606.ENSP00000361540	0	0	0	0	0.953	0.999	0.9	0.963	0.999
BUB1B	NEK2	9606.ENSP00000287598	9606.ENSP00000355966	0	0	0	0	0.902	0.993	0.9	0.652	0.999
BUB1B	MAD2L1	9606.ENSP00000287598	9606.ENSP00000296509	0	0	0	0	0.849	0.999	0.9	0.909	0.999
BUB1B	ZWINT	9606.ENSP00000287598	9606.ENSP00000363055	0	0	0	0	0.806	0.929	0.9	0.669	0.999
C11orf53	COLCA2	9606.ENSP00000280325	9606.ENSP00000484135	0	0	0	0	0	0	0	0.9	0.9
CACNA1B	CACNB4	9606.ENSP00000360423	9606.ENSP00000438949	0	0	0	0	0.131	0.411	0.72	0.452	0.911
CACNA1B	CACNA2D3	9606.ENSP00000360423	9606.ENSP00000419101	0	0	0	0	0.131	0.284	0.9	0.225	0.945
CACNA1E	CACNG4	9606.ENSP00000356545	9606.ENSP00000262138	0	0	0	0	0.064	0	0.9	0.274	0.926
CACNA1E	CACNA2D3	9606.ENSP00000356545	9606.ENSP00000419101	0	0	0	0	0.12	0.284	0.9	0.473	0.962
CACNA1E	CACNB4	9606.ENSP00000356545	9606.ENSP00000438949	0	0	0	0	0.157	0.411	0.9	0.359	0.963
CACNA1S	CACNG1	9606.ENSP00000355192	9606.ENSP00000226021	0	0	0	0	0.225	0.388	0.9	0.446	0.97
CACNA1S	CACNG4	9606.ENSP00000355192	9606.ENSP00000262138	0	0	0	0	0.055	0	0.9	0.136	0.911
CACNA1S	CACNA2D3	9606.ENSP00000355192	9606.ENSP00000419101	0	0	0	0	0.087	0.284	0.9	0.302	0.948
CACNA1S	CACNB4	9606.ENSP00000355192	9606.ENSP00000438949	0	0	0	0	0.063	0.411	0.9	0.538	0.971
CACNA2D3	CACNG1	9606.ENSP00000419101	9606.ENSP00000226021	0	0	0	0	0	0.712	0.9	0.629	0.988
CACNA2D3	CACNG4	9606.ENSP00000419101	9606.ENSP00000262138	0	0	0	0	0.064	0	0.9	0.402	0.939
CACNA2D3	CACNB4	9606.ENSP00000419101	9606.ENSP00000438949	0	0	0	0	0.081	0.453	0.9	0.507	0.971
CACNB4	CACNG1	9606.ENSP00000438949	9606.ENSP00000226021	0	0	0	0	0.063	0.356	0.9	0.642	0.975
CACNB4	CACNG4	9606.ENSP00000438949	9606.ENSP00000262138	0	0	0	0	0.064	0	0.9	0.355	0.934
CALCA	GNGT1	9606.ENSP00000331746	9606.ENSP00000248572	0	0	0	0	0	0	0.9	0	0.9
CALCA	PTH2R	9606.ENSP00000331746	9606.ENSP00000272847	0	0	0	0	0	0	0.9	0.565	0.954
CALCA	CRH	9606.ENSP00000331746	9606.ENSP00000276571	0	0	0	0	0.088	0	0.9	0.666	0.966
CALCA	GHRHR	9606.ENSP00000331746	9606.ENSP00000320180	0	0	0	0	0	0	0.9	0.266	0.923
CALCA	GNG4	9606.ENSP00000331746	9606.ENSP00000375727	0	0	0	0	0	0	0.9	0	0.9
CALCA	RLN3	9606.ENSP00000331746	9606.ENSP00000397415	0	0	0	0	0	0	0.9	0.096	0.905
CALCA	CRHR1	9606.ENSP00000331746	9606.ENSP00000381333	0	0	0	0	0.061	0	0.9	0.41	0.939
CALCA	GIP	9606.ENSP00000331746	9606.ENSP00000350005	0	0	0	0	0	0	0.9	0.452	0.942
CALCA	GLP1R	9606.ENSP00000331746	9606.ENSP00000362353	0	0	0	0	0	0	0.9	0.483	0.946
CALCA	GCG	9606.ENSP00000331746	9606.ENSP00000387662	0	0	0	0	0.064	0	0.9	0.728	0.972
CAP2	ROBO1	9606.ENSP00000229922	9606.ENSP00000420321	0	0	0	0	0.098	0	0.9	0.054	0.907
CAPN9	EVPL	9606.ENSP00000271971	9606.ENSP00000301607	0	0	0	0	0.909	0	0	0.127	0.917
CBX2	HIST1H2BL	9606.ENSP00000308750	9606.ENSP00000366618	0	0	0	0	0.06	0	0.9	0.05	0.902
CBX2	HIST1H2BH	9606.ENSP00000308750	9606.ENSP00000479169	0	0	0	0	0.065	0	0.9	0.05	0.903
CBX2	UBE2C	9606.ENSP00000308750	9606.ENSP00000348838	0	0	0	0	0.298	0.079	0.9	0.11	0.934
CBX2	EZH2	9606.ENSP00000308750	9606.ENSP00000320147	0	0	0	0	0.152	0.157	0.9	0.604	0.967
CCKBR	KISS1R	9606.ENSP00000335544	9606.ENSP00000234371	0	0	0	0.666	0	0	0.9	0.05	0.9
CCKBR	F2RL3	9606.ENSP00000335544	9606.ENSP00000248076	0	0	0	0	0	0	0.9	0	0.9
CCKBR	GNGT1	9606.ENSP00000335544	9606.ENSP00000248572	0	0	0	0	0	0.165	0.9	0	0.912
CCKBR	NTS	9606.ENSP00000335544	9606.ENSP00000256010	0	0	0	0	0.084	0.263	0.9	0.398	0.953
CCKBR	GRP	9606.ENSP00000335544	9606.ENSP00000256857	0	0	0	0	0.092	0	0.9	0.539	0.954
CCKBR	PROK1	9606.ENSP00000335544	9606.ENSP00000271331	0	0	0	0	0	0	0.9	0	0.9
CCKBR	HTR2C	9606.ENSP00000335544	9606.ENSP00000276198	0	0	0	0.615	0.119	0	0.9	0.267	0.916
CCKBR	TACR1	9606.ENSP00000335544	9606.ENSP00000303522	0	0	0	0.643	0.061	0	0.9	0.315	0.912
CCKBR	NTSR2	9606.ENSP00000335544	9606.ENSP00000303686	0	0	0	0.562	0.171	0	0.9	0.358	0.926
CCKBR	GRM5	9606.ENSP00000335544	9606.ENSP00000306138	0	0	0	0	0.158	0.057	0.9	0.158	0.924
CCKBR	CHRM1	9606.ENSP00000335544	9606.ENSP00000306490	0	0	0	0.601	0.17	0	0.9	0.17	0.918
CCKBR	NPFFR2	9606.ENSP00000335544	9606.ENSP00000307822	0	0	0	0.675	0.05	0	0.9	0.387	0.912
CCKBR	GPRC6A	9606.ENSP00000335544	9606.ENSP00000309493	0	0	0	0	0	0.057	0.9	0.053	0.902
CCKBR	UTS2R	9606.ENSP00000335544	9606.ENSP00000323516	0	0	0	0.581	0	0	0.9	0	0.9
CCKBR	GAST	9606.ENSP00000335544	9606.ENSP00000331358	0	0	0	0	0	0.379	0.9	0.958	0.997
CCKBR	LPAR3	9606.ENSP00000335544	9606.ENSP00000395389	0	0	0	0	0	0	0.9	0.047	0.9
CCKBR	LPAR4	9606.ENSP00000335544	9606.ENSP00000408205	0	0	0	0.587	0	0	0.9	0	0.9
CCKBR	PTGFR	9606.ENSP00000335544	9606.ENSP00000359793	0	0	0	0	0	0	0.9	0.069	0.902
CCKBR	OPN4	9606.ENSP00000335544	9606.ENSP00000361141	0	0	0	0.594	0.07	0	0.9	0.111	0.905
CCKBR	TAC3	9606.ENSP00000335544	9606.ENSP00000483110	0	0	0	0	0.098	0	0.9	0.047	0.906
CCKBR	QRFPR	9606.ENSP00000335544	9606.ENSP00000377948	0	0	0	0.652	0.062	0	0.9	0.158	0.906
CCKBR	MLN	9606.ENSP00000335544	9606.ENSP00000388825	0	0	0	0	0	0	0.9	0.116	0.907
CCKBR	GRPR	9606.ENSP00000335544	9606.ENSP00000369643	0	0	0	0.635	0	0	0.9	0.407	0.913
CCKBR	EDN3	9606.ENSP00000335544	9606.ENSP00000337128	0	0	0	0	0	0.157	0.9	0.096	0.917
CCKBR	GNG4	9606.ENSP00000335544	9606.ENSP00000375727	0	0	0	0	0.091	0.165	0.9	0	0.917
CCKBR	NMB	9606.ENSP00000335544	9606.ENSP00000378089	0	0	0	0	0	0	0.9	0.292	0.926
CCKBR	GCG	9606.ENSP00000335544	9606.ENSP00000387662	0	0	0	0	0.061	0	0.9	0.388	0.937
CCL25	DRD4	9606.ENSP00000375086	9606.ENSP00000176183	0	0	0	0	0	0.05	0.9	0	0.9
CCL25	GNGT1	9606.ENSP00000375086	9606.ENSP00000248572	0	0	0	0	0	0	0.9	0	0.9
CCL25	MTNR1B	9606.ENSP00000375086	9606.ENSP00000257068	0	0	0	0	0	0.05	0.9	0	0.9
CCL25	GABBR2	9606.ENSP00000375086	9606.ENSP00000259455	0	0	0	0	0	0	0.9	0	0.9
CCL25	OPRK1	9606.ENSP00000375086	9606.ENSP00000265572	0	0	0	0	0	0.05	0.9	0	0.9
CCL25	GAL	9606.ENSP00000375086	9606.ENSP00000265643	0	0	0	0	0	0	0.9	0.049	0.9
CCL25	SST	9606.ENSP00000375086	9606.ENSP00000287641	0	0	0	0	0	0	0.9	0	0.9
CCL25	SSTR5	9606.ENSP00000375086	9606.ENSP00000293897	0	0	0	0	0	0.05	0.9	0	0.9
CCL25	CXCL5	9606.ENSP00000375086	9606.ENSP00000296027	0	0	0	0	0.055	0.069	0.9	0.56	0.956
CCL25	HTR1F	9606.ENSP00000375086	9606.ENSP00000322924	0	0	0	0	0	0.05	0.9	0	0.9
CCL25	RXFP4	9606.ENSP00000375086	9606.ENSP00000357301	0	0	0	0	0	0.05	0.9	0	0.9
CCL25	CNR1	9606.ENSP00000375086	9606.ENSP00000358513	0	0	0	0	0	0.05	0.9	0	0.9
CCL25	HTR1B	9606.ENSP00000375086	9606.ENSP00000358963	0	0	0	0	0	0.05	0.9	0	0.9
CCL25	P2RY4	9606.ENSP00000375086	9606.ENSP00000363643	0	0	0	0	0	0	0.9	0	0.9
CCL25	HTR1D	9606.ENSP00000375086	9606.ENSP00000363748	0	0	0	0	0	0.05	0.9	0	0.9
CCL25	SSTR3	9606.ENSP00000375086	9606.ENSP00000480971	0	0	0	0	0	0.05	0.9	0	0.9
CCL25	GRM4	9606.ENSP00000375086	9606.ENSP00000440556	0	0	0	0	0	0	0.9	0	0.9
CCL25	GNG4	9606.ENSP00000375086	9606.ENSP00000375727	0	0	0	0	0	0	0.9	0	0.9
CCL25	LPAR3	9606.ENSP00000375086	9606.ENSP00000395389	0	0	0	0	0	0.05	0.9	0	0.9
CCL25	PPY	9606.ENSP00000375086	9606.ENSP00000466009	0	0	0	0	0	0	0.9	0	0.9
CCL25	HCAR1	9606.ENSP00000375086	9606.ENSP00000389255	0	0	0	0	0	0.05	0.9	0	0.9
CCL25	RLN3	9606.ENSP00000375086	9606.ENSP00000397415	0	0	0	0	0	0	0.9	0	0.9
CCL25	CCR3	9606.ENSP00000375086	9606.ENSP00000441600	0	0	0	0	0	0.05	0.9	0.526	0.951
CCL26	CCR3	9606.ENSP00000378365	9606.ENSP00000441600	0	0	0	0	0	0.379	0.8	0.854	0.98
CCNA2	TRIP13	9606.ENSP00000274026	9606.ENSP00000166345	0	0	0	0	0.905	0.165	0	0.132	0.925
CCNA2	CDC6	9606.ENSP00000274026	9606.ENSP00000209728	0	0	0	0	0.906	0.92	0.9	0.876	0.999
CCNA2	MYBL2	9606.ENSP00000274026	9606.ENSP00000217026	0	0	0	0	0.593	0.356	0.8	0.745	0.984
CCNA2	ORC6	9606.ENSP00000274026	9606.ENSP00000219097	0	0	0	0	0.385	0	0.9	0.435	0.962
CCNA2	OIP5	9606.ENSP00000274026	9606.ENSP00000220514	0	0	0	0	0.872	0	0	0.255	0.901
CCNA2	GMNN	9606.ENSP00000274026	9606.ENSP00000230056	0	0	0	0	0.618	0.571	0	0.682	0.943
CCNA2	NCAPH	9606.ENSP00000274026	9606.ENSP00000240423	0	0	0	0	0.841	0	0	0.443	0.908
CCNA2	DLGAP5	9606.ENSP00000274026	9606.ENSP00000247191	0	0	0	0	0.967	0	0	0.416	0.98
CCNA2	NCAPG	9606.ENSP00000274026	9606.ENSP00000251496	0	0	0	0	0.958	0	0	0.293	0.969
CCNA2	CCNB1	9606.ENSP00000274026	9606.ENSP00000256442	0	0	0	0.738	0.971	0.707	0.72	0.924	0.998
CCNA2	KIF23	9606.ENSP00000274026	9606.ENSP00000260363	0	0	0	0	0.939	0.15	0	0.431	0.968
CCNA2	KIF11	9606.ENSP00000274026	9606.ENSP00000260731	0	0	0	0	0.977	0.15	0	0.478	0.989
CCNA2	NDC80	9606.ENSP00000274026	9606.ENSP00000261597	0	0	0	0	0.97	0	0	0.304	0.978
CCNA2	PKMYT1	9606.ENSP00000274026	9606.ENSP00000262300	0	0	0	0	0.585	0.811	0.9	0.382	0.994
CCNA2	CCNE1	9606.ENSP00000274026	9606.ENSP00000262643	0	0	0	0.645	0.393	0.168	0.9	0.773	0.96
CCNA2	SGOL1	9606.ENSP00000274026	9606.ENSP00000263753	0	0	0	0	0.88	0	0	0.285	0.91
CCNA2	MCM2	9606.ENSP00000274026	9606.ENSP00000265056	0	0	0	0	0.846	0.182	0.9	0.641	0.994
CCNA2	CENPE	9606.ENSP00000274026	9606.ENSP00000265148	0	0	0	0	0.963	0.172	0	0.476	0.982
CCNA2	PLK4	9606.ENSP00000274026	9606.ENSP00000270861	0	0	0	0	0.831	0.175	0	0.474	0.92
CCNA2	NUF2	9606.ENSP00000274026	9606.ENSP00000271452	0	0	0	0	0.879	0	0	0.352	0.918
CCNA2	DTL	9606.ENSP00000274026	9606.ENSP00000355958	0	0	0	0	0.826	0	0	0.453	0.9
CCNA2	PSMA8	9606.ENSP00000274026	9606.ENSP00000311121	0	0	0	0	0	0.066	0.9	0.05	0.903
CCNA2	HIST1H2BL	9606.ENSP00000274026	9606.ENSP00000366618	0	0	0	0	0.097	0.062	0.9	0.058	0.909
CCNA2	HIST1H2BH	9606.ENSP00000274026	9606.ENSP00000479169	0	0	0	0	0.108	0.062	0.9	0.058	0.91
CCNA2	RACGAP1	9606.ENSP00000274026	9606.ENSP00000404190	0	0	0	0	0.878	0.085	0	0.296	0.914
CCNA2	UHRF1	9606.ENSP00000274026	9606.ENSP00000479617	0	0	0	0	0.877	0	0	0.33	0.914
CCNA2	CENPA	9606.ENSP00000274026	9606.ENSP00000336868	0	0	0	0	0.833	0.126	0	0.463	0.915
CCNA2	CDC45	9606.ENSP00000274026	9606.ENSP00000405726	0	0	0	0	0.817	0.07	0	0.563	0.919
CCNA2	CDCA3	9606.ENSP00000274026	9606.ENSP00000442068	0	0	0	0	0.881	0	0	0.412	0.927
CCNA2	SHCBP1	9606.ENSP00000274026	9606.ENSP00000306473	0	0	0	0	0.929	0	0	0.108	0.934
CCNA2	TACC3	9606.ENSP00000274026	9606.ENSP00000326550	0	0	0	0	0.925	0	0	0.183	0.936
CCNA2	MCM10	9606.ENSP00000274026	9606.ENSP00000418268	0	0	0	0	0.885	0	0	0.471	0.937
CCNA2	E2F8	9606.ENSP00000274026	9606.ENSP00000481103	0	0	0	0	0.82	0.169	0	0.656	0.944
CCNA2	CENPF	9606.ENSP00000274026	9606.ENSP00000355922	0	0	0	0	0.908	0	0	0.473	0.949
CCNA2	TP73	9606.ENSP00000274026	9606.ENSP00000367545	0	0	0	0	0.063	0.387	0.9	0.231	0.949
CCNA2	ECT2	9606.ENSP00000274026	9606.ENSP00000376457	0	0	0	0	0.936	0.104	0	0.243	0.952
CCNA2	HJURP	9606.ENSP00000274026	9606.ENSP00000414109	0	0	0	0	0.904	0	0	0.537	0.953
CCNA2	PRC1	9606.ENSP00000274026	9606.ENSP00000377793	0	0	0	0	0.928	0.341	0	0.122	0.954
CCNA2	CEP55	9606.ENSP00000274026	9606.ENSP00000360540	0	0	0	0	0.942	0	0	0.247	0.954
CCNA2	MKI67	9606.ENSP00000274026	9606.ENSP00000357643	0	0	0	0	0.922	0	0	0.444	0.955
CCNA2	KIAA0101	9606.ENSP00000274026	9606.ENSP00000300035	0	0	0	0	0.949	0	0	0.166	0.956
CCNA2	TPX2	9606.ENSP00000274026	9606.ENSP00000300403	0	0	0	0	0.927	0	0	0.417	0.956
CCNA2	KIF15	9606.ENSP00000274026	9606.ENSP00000324020	0	0	0	0	0.933	0.15	0	0.298	0.957
CCNA2	KIF4A	9606.ENSP00000274026	9606.ENSP00000363524	0	0	0	0	0.924	0.15	0	0.389	0.957
CCNA2	MELK	9606.ENSP00000274026	9606.ENSP00000298048	0	0	0	0	0.93	0.186	0	0.36	0.96
CCNA2	PTTG1	9606.ENSP00000274026	9606.ENSP00000377536	0	0	0	0	0.896	0	0	0.641	0.961
CCNA2	RRM2	9606.ENSP00000274026	9606.ENSP00000353770	0	0	0	0	0.927	0	0	0.49	0.961
CCNA2	CCNE2	9606.ENSP00000274026	9606.ENSP00000429089	0	0	0	0.64	0.431	0.168	0.9	0.771	0.962
CCNA2	PBK	9606.ENSP00000274026	9606.ENSP00000428489	0	0	0	0	0.946	0.09	0	0.312	0.963
CCNA2	CDKN3	9606.ENSP00000274026	9606.ENSP00000335357	0	0	0	0	0.887	0.112	0	0.672	0.964
CCNA2	KIF2C	9606.ENSP00000274026	9606.ENSP00000361298	0	0	0	0	0.932	0.15	0	0.43	0.964
CCNA2	NEK2	9606.ENSP00000274026	9606.ENSP00000355966	0	0	0	0	0.919	0	0	0.587	0.965
CCNA2	KIF20A	9606.ENSP00000274026	9606.ENSP00000378356	0	0	0	0	0.938	0.15	0	0.445	0.968
CCNA2	CCNB2	9606.ENSP00000274026	9606.ENSP00000288207	0	0	0	0.743	0.97	0.086	0	0.806	0.977
CCNA2	E2F2	9606.ENSP00000274026	9606.ENSP00000355249	0	0	0	0	0.215	0.261	0.9	0.714	0.981
CCNA2	TOP2A	9606.ENSP00000274026	9606.ENSP00000411532	0	0	0	0	0.967	0.05	0	0.544	0.984
CCNA2	CDCA8	9606.ENSP00000274026	9606.ENSP00000362146	0	0	0	0	0.974	0	0	0.427	0.984
CCNA2	TTK	9606.ENSP00000274026	9606.ENSP00000358813	0	0	0	0	0.975	0.187	0	0.42	0.987
CCNA2	NUSAP1	9606.ENSP00000274026	9606.ENSP00000453403	0	0	0	0	0.981	0	0	0.409	0.988
CCNA2	E2F1	9606.ENSP00000274026	9606.ENSP00000345571	0	0	0	0	0.313	0.521	0.9	0.714	0.989
CCNA2	CDC25A	9606.ENSP00000274026	9606.ENSP00000303706	0	0	0	0	0.579	0.213	0.9	0.744	0.99
CCNA2	ORC1	9606.ENSP00000274026	9606.ENSP00000360623	0	0	0	0	0.753	0.525	0.9	0.5	0.993
CCNA2	PLK1	9606.ENSP00000274026	9606.ENSP00000300093	0	0	0	0	0.979	0.175	0	0.704	0.994
CCNA2	CDC25C	9606.ENSP00000274026	9606.ENSP00000321656	0	0	0	0	0.701	0.4	0.9	0.765	0.995
CCNA2	FOXM1	9606.ENSP00000274026	9606.ENSP00000342307	0	0	0	0	0.863	0.082	0.9	0.751	0.996
CCNA2	UBE2C	9606.ENSP00000274026	9606.ENSP00000348838	0	0	0	0	0.956	0.164	0.9	0.646	0.998
CCNA2	CDT1	9606.ENSP00000274026	9606.ENSP00000301019	0	0	0	0	0.812	0.808	0.9	0.702	0.998
CCNA2	CDK1	9606.ENSP00000274026	9606.ENSP00000378699	0	0.007	0	0	0.986	0.77	0.9	0.937	0.999
CCNA2	CDC20	9606.ENSP00000274026	9606.ENSP00000361540	0	0	0	0	0.984	0.994	0.9	0.847	0.999
CCNA2	MAD2L1	9606.ENSP00000274026	9606.ENSP00000296509	0	0	0	0	0.984	0.993	0.9	0.572	0.999
CCNB1	CDC6	9606.ENSP00000256442	9606.ENSP00000209728	0	0	0	0	0.809	0.787	0	0.756	0.989
CCNB1	CENPM	9606.ENSP00000256442	9606.ENSP00000215980	0	0	0	0	0.715	0	0.9	0.162	0.974
CCNB1	MYBL2	9606.ENSP00000256442	9606.ENSP00000217026	0	0	0	0	0.575	0.185	0.9	0.775	0.991
CCNB1	ORC6	9606.ENSP00000256442	9606.ENSP00000219097	0	0	0	0	0.297	0	0.9	0.345	0.95
CCNB1	OIP5	9606.ENSP00000256442	9606.ENSP00000220514	0	0	0	0	0.902	0	0	0.118	0.91
CCNB1	GMNN	9606.ENSP00000256442	9606.ENSP00000230056	0	0	0	0	0.786	0	0	0.639	0.919
CCNB1	NCAPH	9606.ENSP00000256442	9606.ENSP00000240423	0	0	0	0	0.761	0	0.9	0.372	0.983
CCNB1	DLGAP5	9606.ENSP00000256442	9606.ENSP00000247191	0	0	0	0	0.976	0	0	0.506	0.987
CCNB1	NCAPG	9606.ENSP00000256442	9606.ENSP00000251496	0	0	0	0	0.867	0	0.9	0.374	0.99
CCNB1	DYNC1I1	9606.ENSP00000256442	9606.ENSP00000320130	0	0	0	0	0	0	0.9	0	0.9
CCNB1	KIF15	9606.ENSP00000256442	9606.ENSP00000324020	0	0	0	0	0.836	0.15	0	0.382	0.906
CCNB1	CDCA3	9606.ENSP00000256442	9606.ENSP00000442068	0	0	0	0	0.843	0	0	0.447	0.909
CCNB1	KIAA0101	9606.ENSP00000256442	9606.ENSP00000300035	0	0	0	0	0.892	0	0	0.213	0.911
CCNB1	MKI67	9606.ENSP00000256442	9606.ENSP00000357643	0	0	0	0	0.791	0	0	0.596	0.912
CCNB1	SKA3	9606.ENSP00000256442	9606.ENSP00000319417	0	0	0	0	0.654	0	0.72	0.185	0.914
CCNB1	HIST1H2BL	9606.ENSP00000256442	9606.ENSP00000366618	0	0	0	0	0.095	0.064	0.9	0.126	0.916
CCNB1	RASGRF1	9606.ENSP00000256442	9606.ENSP00000405963	0	0	0	0	0.061	0.165	0.9	0.066	0.916
CCNB1	HIST1H2BH	9606.ENSP00000256442	9606.ENSP00000479169	0	0	0	0	0.106	0.064	0.9	0.129	0.917
CCNB1	CENPL	9606.ENSP00000256442	9606.ENSP00000348527	0	0	0	0	0.191	0	0.9	0.077	0.918
CCNB1	FBXO43	9606.ENSP00000256442	9606.ENSP00000403293	0	0	0	0	0.144	0.126	0.8	0.527	0.919
CCNB1	CDT1	9606.ENSP00000256442	9606.ENSP00000301019	0	0	0	0	0.746	0.354	0	0.577	0.924
CCNB1	NUSAP1	9606.ENSP00000256442	9606.ENSP00000453403	0	0	0	0	0.883	0	0	0.455	0.933
CCNB1	MCM2	9606.ENSP00000256442	9606.ENSP00000265056	0	0	0	0	0.804	0.24	0	0.592	0.934
CCNB1	KIF4A	9606.ENSP00000256442	9606.ENSP00000363524	0	0	0	0	0.888	0.15	0	0.463	0.944
CCNB1	CENPK	9606.ENSP00000256442	9606.ENSP00000379911	0	0	0	0	0.482	0	0.9	0.058	0.946
CCNB1	SFN	9606.ENSP00000256442	9606.ENSP00000340989	0	0	0	0	0.059	0.19	0.9	0.441	0.951
CCNB1	CCNE1	9606.ENSP00000256442	9606.ENSP00000262643	0	0	0	0.636	0.368	0	0.9	0.802	0.953
CCNB1	STMN1	9606.ENSP00000256442	9606.ENSP00000410452	0	0	0	0	0.331	0	0.9	0.367	0.954
CCNB1	CDKN3	9606.ENSP00000256442	9606.ENSP00000335357	0	0	0	0	0.868	0.185	0	0.607	0.954
CCNB1	RRM2	9606.ENSP00000256442	9606.ENSP00000353770	0	0	0	0	0.899	0	0	0.567	0.954
CCNB1	CEP55	9606.ENSP00000256442	9606.ENSP00000360540	0	0	0	0	0.867	0	0	0.671	0.954
CCNB1	NEK2	9606.ENSP00000256442	9606.ENSP00000355966	0	0	0	0	0.899	0	0	0.571	0.955
CCNB1	CENPI	9606.ENSP00000256442	9606.ENSP00000362018	0	0	0	0	0.567	0	0.9	0.185	0.961
CCNB1	MELK	9606.ENSP00000256442	9606.ENSP00000298048	0	0	0	0	0.92	0.262	0	0.45	0.964
CCNB1	TTK	9606.ENSP00000256442	9606.ENSP00000358813	0	0	0	0	0.874	0.358	0	0.597	0.964
CCNB1	RACGAP1	9606.ENSP00000256442	9606.ENSP00000404190	0	0	0	0	0.937	0.085	0	0.441	0.965
CCNB1	E2F1	9606.ENSP00000256442	9606.ENSP00000345571	0	0	0	0	0.249	0.169	0.9	0.54	0.967
CCNB1	ERCC6L	9606.ENSP00000256442	9606.ENSP00000334675	0	0	0	0	0.582	0.157	0.9	0.227	0.969
CCNB1	GTSE1	9606.ENSP00000256442	9606.ENSP00000415430	0	0	0	0	0.608	0	0.9	0.36	0.972
CCNB1	TPX2	9606.ENSP00000256442	9606.ENSP00000300403	0	0	0	0	0.946	0	0	0.515	0.972
CCNB1	ORC1	9606.ENSP00000256442	9606.ENSP00000360623	0	0	0	0	0.439	0.353	0.9	0.387	0.974
CCNB1	PRC1	9606.ENSP00000256442	9606.ENSP00000377793	0	0	0	0	0.941	0.384	0	0.418	0.977
CCNB1	CENPU	9606.ENSP00000256442	9606.ENSP00000281453	0	0	0	0	0.723	0	0.9	0.238	0.977
CCNB1	DIAPH3	9606.ENSP00000256442	9606.ENSP00000383178	0	0	0	0	0.36	0.963	0	0.15	0.978
CCNB1	SGOL1	9606.ENSP00000256442	9606.ENSP00000263753	0	0	0	0	0.694	0.05	0.9	0.389	0.979
CCNB1	KIF18A	9606.ENSP00000256442	9606.ENSP00000263181	0	0	0	0	0.666	0.15	0.9	0.376	0.979
CCNB1	KIF23	9606.ENSP00000256442	9606.ENSP00000260363	0	0	0	0	0.941	0.15	0	0.619	0.979
CCNB1	KIF20A	9606.ENSP00000256442	9606.ENSP00000378356	0	0	0	0	0.956	0.15	0	0.542	0.981
CCNB1	CDCA5	9606.ENSP00000256442	9606.ENSP00000275517	0	0	0	0	0.741	0	0.9	0.349	0.981
CCNB1	SKA1	9606.ENSP00000256442	9606.ENSP00000285116	0	0	0	0	0.777	0	0.9	0.293	0.982
CCNB1	PTTG1	9606.ENSP00000256442	9606.ENSP00000377536	0	0	0	0	0.929	0	0	0.778	0.983
CCNB1	TOP2A	9606.ENSP00000256442	9606.ENSP00000411532	0	0	0	0	0.964	0.057	0	0.622	0.986
CCNB1	PBK	9606.ENSP00000256442	9606.ENSP00000428489	0	0	0	0	0.937	0.41	0	0.668	0.986
CCNB1	SPC25	9606.ENSP00000256442	9606.ENSP00000282074	0	0	0	0	0.838	0	0.9	0.223	0.986
CCNB1	KIF11	9606.ENSP00000256442	9606.ENSP00000260731	0	0	0	0	0.939	0.266	0	0.725	0.986
CCNB1	ZWINT	9606.ENSP00000256442	9606.ENSP00000363055	0	0	0	0	0.796	0	0.9	0.399	0.986
CCNB1	SPC24	9606.ENSP00000256442	9606.ENSP00000465075	0	0	0	0	0.848	0	0.9	0.254	0.987
CCNB1	NUF2	9606.ENSP00000256442	9606.ENSP00000271452	0	0	0	0	0.814	0	0.9	0.447	0.988
CCNB1	SGOL2	9606.ENSP00000256442	9606.ENSP00000350447	0	0	0	0	0.863	0	0.9	0.269	0.989
CCNB1	CENPA	9606.ENSP00000256442	9606.ENSP00000336868	0	0	0	0	0.788	0.126	0.9	0.549	0.99
CCNB1	CENPF	9606.ENSP00000256442	9606.ENSP00000355922	0	0	0	0	0.849	0	0.9	0.586	0.993
CCNB1	CENPE	9606.ENSP00000256442	9606.ENSP00000265148	0	0	0	0	0.83	0.15	0.9	0.622	0.993
CCNB1	NDC80	9606.ENSP00000256442	9606.ENSP00000261597	0	0	0	0	0.912	0.387	0.9	0.506	0.996
CCNB1	KIF2C	9606.ENSP00000256442	9606.ENSP00000361298	0	0	0	0	0.929	0.15	0.9	0.513	0.996
CCNB1	PKMYT1	9606.ENSP00000256442	9606.ENSP00000262300	0	0	0	0	0.405	0.896	0.9	0.709	0.997
CCNB1	FOXM1	9606.ENSP00000256442	9606.ENSP00000342307	0	0	0	0	0.811	0.349	0.9	0.827	0.997
CCNB1	CDCA8	9606.ENSP00000256442	9606.ENSP00000362146	0	0	0	0	0.968	0	0.9	0.544	0.998
CCNB1	MAD2L1	9606.ENSP00000256442	9606.ENSP00000296509	0	0	0	0	0.955	0.13	0.9	0.76	0.998
CCNB1	UBE2C	9606.ENSP00000256442	9606.ENSP00000348838	0	0	0	0	0.924	0.164	0.9	0.825	0.998
CCNB1	CDC25A	9606.ENSP00000256442	9606.ENSP00000303706	0	0	0	0	0.727	0.74	0.9	0.776	0.998
CCNB1	CDK1	9606.ENSP00000256442	9606.ENSP00000378699	0	0	0	0	0.969	0.999	0.9	0.983	0.999
CCNB1	CDC20	9606.ENSP00000256442	9606.ENSP00000361540	0	0	0	0	0.972	0.997	0.9	0.878	0.999
CCNB1	CCNB2	9606.ENSP00000256442	9606.ENSP00000288207	0	0	0	0.943	0.955	0.945	0.9	0.839	0.999
CCNB1	PLK1	9606.ENSP00000256442	9606.ENSP00000300093	0	0	0	0	0.936	0.772	0.9	0.942	0.999
CCNB1	CDC25C	9606.ENSP00000256442	9606.ENSP00000321656	0	0	0	0	0.78	0.474	0.9	0.939	0.999
CCNB2	CDC6	9606.ENSP00000288207	9606.ENSP00000209728	0	0	0	0	0.748	0.707	0	0.691	0.975
CCNB2	CENPM	9606.ENSP00000288207	9606.ENSP00000215980	0	0	0	0	0.797	0	0.9	0.329	0.985
CCNB2	MYBL2	9606.ENSP00000288207	9606.ENSP00000217026	0	0	0	0	0.604	0.185	0.9	0.482	0.981
CCNB2	GMNN	9606.ENSP00000288207	9606.ENSP00000230056	0	0	0	0	0.847	0	0	0.474	0.916
CCNB2	NCAPH	9606.ENSP00000288207	9606.ENSP00000240423	0	0	0	0	0.82	0	0.9	0.405	0.988
CCNB2	DLGAP5	9606.ENSP00000288207	9606.ENSP00000247191	0	0	0	0	0.976	0	0	0.437	0.986
CCNB2	NCAPG	9606.ENSP00000288207	9606.ENSP00000251496	0	0	0	0	0.937	0	0.9	0.398	0.995
CCNB2	KIF23	9606.ENSP00000288207	9606.ENSP00000260363	0	0	0	0	0.944	0.15	0	0.649	0.982
CCNB2	KIF11	9606.ENSP00000288207	9606.ENSP00000260731	0	0	0	0	0.964	0.266	0	0.709	0.991
CCNB2	NDC80	9606.ENSP00000288207	9606.ENSP00000261597	0	0	0	0	0.961	0	0.9	0.578	0.998
CCNB2	PKMYT1	9606.ENSP00000288207	9606.ENSP00000262300	0	0	0	0	0.607	0.717	0.9	0.668	0.995
CCNB2	KIF18A	9606.ENSP00000288207	9606.ENSP00000263181	0	0	0	0	0.599	0.15	0.9	0.285	0.972
CCNB2	SGOL1	9606.ENSP00000288207	9606.ENSP00000263753	0	0	0	0	0.865	0.05	0.9	0.267	0.989
CCNB2	MCM2	9606.ENSP00000288207	9606.ENSP00000265056	0	0	0	0	0.865	0.803	0	0.592	0.988
CCNB2	CENPE	9606.ENSP00000288207	9606.ENSP00000265148	0	0	0	0	0.87	0.15	0.9	0.499	0.993
CCNB2	PLK4	9606.ENSP00000288207	9606.ENSP00000270861	0	0	0	0	0.801	0.175	0	0.499	0.91
CCNB2	NUF2	9606.ENSP00000288207	9606.ENSP00000271452	0	0	0	0	0.872	0	0.9	0.409	0.991
CCNB2	CDCA5	9606.ENSP00000288207	9606.ENSP00000275517	0	0	0	0	0.837	0	0.9	0.471	0.99
CCNB2	CENPU	9606.ENSP00000288207	9606.ENSP00000281453	0	0	0	0	0.758	0	0.9	0.211	0.979
CCNB2	SPC25	9606.ENSP00000288207	9606.ENSP00000282074	0	0	0	0	0.843	0	0.9	0.184	0.986
CCNB2	SKA1	9606.ENSP00000288207	9606.ENSP00000285116	0	0	0	0	0.749	0	0.9	0.269	0.98
CCNB2	DYNC1I1	9606.ENSP00000288207	9606.ENSP00000320130	0	0	0	0	0	0	0.9	0	0.9
CCNB2	CENPW	9606.ENSP00000288207	9606.ENSP00000357308	0	0	0	0	0.887	0	0	0.211	0.907
CCNB2	CENPL	9606.ENSP00000288207	9606.ENSP00000348527	0	0	0	0	0.127	0	0.9	0.058	0.91
CCNB2	ECT2	9606.ENSP00000288207	9606.ENSP00000376457	0	0	0	0	0.86	0.143	0	0.314	0.91
CCNB2	CEP55	9606.ENSP00000288207	9606.ENSP00000360540	0	0	0	0	0.852	0	0	0.448	0.914
CCNB2	HJURP	9606.ENSP00000288207	9606.ENSP00000414109	0	0	0	0	0.9	0	0	0.196	0.916
CCNB2	CDKN3	9606.ENSP00000288207	9606.ENSP00000335357	0	0	0	0	0.857	0.185	0	0.363	0.919
CCNB2	MKI67	9606.ENSP00000288207	9606.ENSP00000357643	0	0	0	0	0.859	0	0	0.455	0.92
CCNB2	CDT1	9606.ENSP00000288207	9606.ENSP00000301019	0	0	0	0	0.867	0	0	0.427	0.92
CCNB2	SFN	9606.ENSP00000288207	9606.ENSP00000340989	0	0	0	0	0.061	0.19	0.9	0.142	0.926
CCNB2	CCNE2	9606.ENSP00000288207	9606.ENSP00000429089	0	0	0	0.635	0.354	0.86	0	0.765	0.931
CCNB2	CDC45	9606.ENSP00000288207	9606.ENSP00000405726	0	0	0	0	0.864	0.08	0	0.537	0.937
CCNB2	SGOL2	9606.ENSP00000288207	9606.ENSP00000350447	0	0	0	0	0.328	0	0.9	0.186	0.94
CCNB2	KIF15	9606.ENSP00000288207	9606.ENSP00000324020	0	0	0	0	0.889	0.15	0	0.427	0.941
CCNB2	CENPI	9606.ENSP00000288207	9606.ENSP00000362018	0	0	0	0	0.4	0	0.9	0.118	0.942
CCNB2	KIAA0101	9606.ENSP00000288207	9606.ENSP00000300035	0	0	0	0	0.936	0	0	0.136	0.943
CCNB2	CENPK	9606.ENSP00000288207	9606.ENSP00000379911	0	0	0	0	0.402	0	0.9	0.161	0.945
CCNB2	KIFC1	9606.ENSP00000288207	9606.ENSP00000393963	0	0	0	0	0.894	0.157	0	0.454	0.947
CCNB2	ERCC6L	9606.ENSP00000288207	9606.ENSP00000334675	0	0	0	0	0.37	0.157	0.9	0.129	0.947
CCNB2	RACGAP1	9606.ENSP00000288207	9606.ENSP00000404190	0	0	0	0	0.934	0.085	0	0.369	0.958
CCNB2	RRM2	9606.ENSP00000288207	9606.ENSP00000353770	0	0	0	0	0.909	0	0	0.559	0.958
CCNB2	PRC1	9606.ENSP00000288207	9606.ENSP00000377793	0	0	0	0	0.9	0.191	0	0.542	0.959
CCNB2	TPX2	9606.ENSP00000288207	9606.ENSP00000300403	0	0	0	0	0.935	0	0	0.426	0.961
CCNB2	CDCA3	9606.ENSP00000288207	9606.ENSP00000442068	0	0	0	0	0.926	0	0	0.494	0.961
CCNB2	SPC24	9606.ENSP00000288207	9606.ENSP00000465075	0	0	0	0	0.555	0	0.9	0.211	0.961
CCNB2	KIF4A	9606.ENSP00000288207	9606.ENSP00000363524	0	0	0	0	0.924	0.15	0	0.504	0.965
CCNB2	PBK	9606.ENSP00000288207	9606.ENSP00000428489	0	0	0	0	0.951	0.09	0	0.354	0.968
CCNB2	MELK	9606.ENSP00000288207	9606.ENSP00000298048	0	0	0	0	0.919	0.262	0	0.51	0.968
CCNB2	PTTG1	9606.ENSP00000288207	9606.ENSP00000377536	0	0	0	0	0.936	0	0	0.613	0.974
CCNB2	NUSAP1	9606.ENSP00000288207	9606.ENSP00000453403	0	0	0	0	0.956	0	0	0.534	0.978
CCNB2	KIF20A	9606.ENSP00000288207	9606.ENSP00000378356	0	0	0	0	0.952	0.15	0	0.542	0.979
CCNB2	NEK2	9606.ENSP00000288207	9606.ENSP00000355966	0	0	0	0	0.955	0	0	0.564	0.979
CCNB2	CDC25A	9606.ENSP00000288207	9606.ENSP00000303706	0	0	0	0	0.728	0.188	0.8	0.645	0.982
CCNB2	TTK	9606.ENSP00000288207	9606.ENSP00000358813	0	0	0	0	0.939	0.358	0	0.612	0.983
CCNB2	TOP2A	9606.ENSP00000288207	9606.ENSP00000411532	0	0	0	0	0.965	0.057	0	0.623	0.986
CCNB2	GTSE1	9606.ENSP00000288207	9606.ENSP00000415430	0	0	0	0	0.791	0	0.9	0.417	0.986
CCNB2	ZWINT	9606.ENSP00000288207	9606.ENSP00000363055	0	0	0	0	0.799	0	0.9	0.448	0.987
CCNB2	CENPA	9606.ENSP00000288207	9606.ENSP00000336868	0	0	0	0	0.81	0.126	0.9	0.499	0.99
CCNB2	FOXM1	9606.ENSP00000288207	9606.ENSP00000342307	0	0	0	0	0.819	0.082	0.9	0.527	0.991
CCNB2	CDC25C	9606.ENSP00000288207	9606.ENSP00000321656	0	0	0	0	0.795	0.3	0.8	0.752	0.991
CCNB2	UBE2C	9606.ENSP00000288207	9606.ENSP00000348838	0	0	0	0	0.976	0.164	0	0.696	0.993
CCNB2	CENPF	9606.ENSP00000288207	9606.ENSP00000355922	0	0	0	0	0.901	0	0.9	0.544	0.995
CCNB2	DIAPH3	9606.ENSP00000288207	9606.ENSP00000383178	0	0	0	0	0.555	0.991	0	0.086	0.996
CCNB2	KIF2C	9606.ENSP00000288207	9606.ENSP00000361298	0	0	0	0	0.914	0.15	0.9	0.526	0.996
CCNB2	CDCA8	9606.ENSP00000288207	9606.ENSP00000362146	0	0	0	0	0.938	0	0.9	0.578	0.997
CCNB2	MAD2L1	9606.ENSP00000288207	9606.ENSP00000296509	0	0	0	0	0.926	0.13	0.9	0.788	0.998
CCNB2	PLK1	9606.ENSP00000288207	9606.ENSP00000300093	0	0	0	0	0.937	0.303	0.9	0.779	0.998
CCNB2	CDK1	9606.ENSP00000288207	9606.ENSP00000378699	0	0	0	0	0.993	0.966	0.9	0.853	0.999
CCNB2	CDC20	9606.ENSP00000288207	9606.ENSP00000361540	0	0	0	0	0.989	0.71	0.9	0.829	0.999
CCNE1	CDC6	9606.ENSP00000262643	9606.ENSP00000209728	0	0	0	0	0.597	0.503	0.9	0.695	0.993
CCNE1	ORC6	9606.ENSP00000262643	9606.ENSP00000219097	0	0	0	0	0.297	0	0.9	0.307	0.947
CCNE1	CCNE2	9606.ENSP00000262643	9606.ENSP00000429089	0	0	0	0.928	0.124	0	0.9	0.743	0.913
CCNE1	TP73	9606.ENSP00000262643	9606.ENSP00000367545	0	0	0	0	0.08	0.445	0.9	0.33	0.961
CCNE1	E2F2	9606.ENSP00000262643	9606.ENSP00000355249	0	0	0	0	0.106	0.169	0.9	0.563	0.963
CCNE1	ORC1	9606.ENSP00000262643	9606.ENSP00000360623	0	0	0	0	0.337	0.315	0.9	0.324	0.965
CCNE1	FOXM1	9606.ENSP00000262643	9606.ENSP00000342307	0	0	0	0	0.198	0.405	0.9	0.453	0.97
CCNE1	E2F1	9606.ENSP00000262643	9606.ENSP00000345571	0	0	0	0	0.246	0.388	0.9	0.592	0.978
CCNE1	CDT1	9606.ENSP00000262643	9606.ENSP00000301019	0	0	0	0	0.35	0.305	0.9	0.605	0.979
CCNE1	CDC25A	9606.ENSP00000262643	9606.ENSP00000303706	0	0	0	0	0.422	0.472	0.9	0.715	0.99
CCNE1	CDK1	9606.ENSP00000262643	9606.ENSP00000378699	0	0	0	0	0.305	0.619	0.9	0.827	0.994
CCNE2	CDC6	9606.ENSP00000429089	9606.ENSP00000209728	0	0	0	0	0.627	0.315	0.9	0.639	0.989
CCNE2	CDC25A	9606.ENSP00000429089	9606.ENSP00000303706	0	0	0	0	0.309	0.185	0.9	0.705	0.981
CCNE2	TP73	9606.ENSP00000429089	9606.ENSP00000367545	0	0	0	0	0.061	0.185	0.9	0.186	0.929
CCNE2	CDK1	9606.ENSP00000429089	9606.ENSP00000378699	0	0	0	0	0.599	0.412	0.9	0.725	0.992
CCNF	TRIM50	9606.ENSP00000380256	9606.ENSP00000327994	0	0	0	0	0.058	0.054	0.9	0	0.903
CCNF	TRAIP	9606.ENSP00000380256	9606.ENSP00000328203	0	0	0	0	0.127	0	0.9	0.209	0.924
CCNF	UBE2C	9606.ENSP00000380256	9606.ENSP00000348838	0	0	0	0	0.382	0.164	0.9	0.208	0.953
CCNF	UBE2U	9606.ENSP00000380256	9606.ENSP00000360116	0	0	0	0	0	0.164	0.9	0.055	0.914
CCNF	CDC20	9606.ENSP00000380256	9606.ENSP00000361540	0	0	0	0	0.861	0.4	0.9	0.547	0.995
CCNF	TRIM63	9606.ENSP00000380256	9606.ENSP00000363390	0	0	0	0	0.058	0.054	0.9	0	0.903
CCNF	TRIM71	9606.ENSP00000380256	9606.ENSP00000373272	0	0	0	0	0.079	0.054	0.9	0	0.905
CCNF	FBXW10	9606.ENSP00000380256	9606.ENSP00000379025	0	0	0	0	0.063	0.186	0.9	0.307	0.94
CCNF	FBXL16	9606.ENSP00000380256	9606.ENSP00000380746	0	0	0	0	0.061	0.132	0.9	0.05	0.912
CCR3	DRD4	9606.ENSP00000441600	9606.ENSP00000176183	0	0	0	0	0	0	0.9	0.055	0.901
CCR3	GNGT1	9606.ENSP00000441600	9606.ENSP00000248572	0	0	0	0	0	0.165	0.9	0	0.912
CCR3	MTNR1B	9606.ENSP00000441600	9606.ENSP00000257068	0	0	0	0.609	0	0	0.9	0.064	0.9
CCR3	GABBR2	9606.ENSP00000441600	9606.ENSP00000259455	0	0	0	0	0	0	0.9	0.069	0.902
CCR3	OPRK1	9606.ENSP00000441600	9606.ENSP00000265572	0	0	0	0.754	0	0	0.9	0.132	0.902
CCR3	GAL	9606.ENSP00000441600	9606.ENSP00000265643	0	0	0	0	0	0	0.9	0	0.9
CCR3	HTR2C	9606.ENSP00000441600	9606.ENSP00000276198	0	0	0	0	0	0	0.9	0	0.9
CCR3	SST	9606.ENSP00000441600	9606.ENSP00000287641	0	0	0	0	0	0	0.9	0.107	0.906
CCR3	SSTR5	9606.ENSP00000441600	9606.ENSP00000293897	0	0	0	0.737	0	0	0.9	0.049	0.9
CCR3	CXCL5	9606.ENSP00000441600	9606.ENSP00000296027	0	0	0	0	0.062	0	0.9	0.52	0.951
CCR3	CHRM1	9606.ENSP00000441600	9606.ENSP00000306490	0	0	0	0	0	0	0.9	0.043	0.9
CCR3	HTR1F	9606.ENSP00000441600	9606.ENSP00000322924	0	0	0	0.569	0	0	0.9	0.048	0.9
CCR3	RXFP4	9606.ENSP00000441600	9606.ENSP00000357301	0	0	0	0.647	0	0	0.9	0.103	0.902
CCR3	CNR1	9606.ENSP00000441600	9606.ENSP00000358513	0	0	0	0	0	0	0.9	0.084	0.904
CCR3	HTR1B	9606.ENSP00000441600	9606.ENSP00000358963	0	0	0	0.568	0	0	0.9	0.047	0.9
CCR3	P2RY4	9606.ENSP00000441600	9606.ENSP00000363643	0	0	0	0.69	0	0	0.9	0	0.9
CCR3	HTR1D	9606.ENSP00000441600	9606.ENSP00000363748	0	0	0	0.573	0	0	0.9	0.059	0.9
CCR3	GNG4	9606.ENSP00000441600	9606.ENSP00000375727	0	0	0	0	0	0.165	0.9	0	0.912
CCR3	HCAR1	9606.ENSP00000441600	9606.ENSP00000389255	0	0	0	0.617	0	0	0.9	0.193	0.906
CCR3	LPAR3	9606.ENSP00000441600	9606.ENSP00000395389	0	0	0	0	0.052	0	0.9	0.064	0.903
CCR3	RLN3	9606.ENSP00000441600	9606.ENSP00000397415	0	0	0	0	0	0	0.9	0	0.9
CCR3	GRM4	9606.ENSP00000441600	9606.ENSP00000440556	0	0	0	0	0	0.057	0.9	0	0.901
CCR3	SSTR3	9606.ENSP00000441600	9606.ENSP00000480971	0	0	0	0.697	0	0	0.9	0	0.9
CCR3	PPY	9606.ENSP00000441600	9606.ENSP00000466009	0	0	0	0	0	0	0.9	0	0.9
CD109	PRSS21	9606.ENSP00000287097	9606.ENSP00000005995	0	0	0	0	0.064	0.05	0.9	0.176	0.917
CD109	CEACAM7	9606.ENSP00000287097	9606.ENSP00000006724	0	0	0	0	0	0	0.9	0	0.9
CD109	THY1	9606.ENSP00000287097	9606.ENSP00000284240	0	0	0	0	0.061	0	0.9	0.286	0.927
CD109	GP2	9606.ENSP00000287097	9606.ENSP00000370767	0	0	0	0	0	0	0.9	0	0.9
CD109	LY6H	9606.ENSP00000287097	9606.ENSP00000399485	0	0	0	0	0	0	0.9	0	0.9
CD109	LYPD8	9606.ENSP00000287097	9606.ENSP00000466070	0	0	0	0	0	0	0.9	0	0.9
CD109	PSCA	9606.ENSP00000287097	9606.ENSP00000301258	0	0	0	0	0	0	0.9	0	0.9
CD109	LYPD1	9606.ENSP00000287097	9606.ENSP00000380605	0	0	0	0	0	0	0.9	0	0.9
CD109	PRND	9606.ENSP00000287097	9606.ENSP00000306900	0	0	0	0	0	0	0.9	0	0.9
CD109	MDGA1	9606.ENSP00000287097	9606.ENSP00000402584	0	0	0	0	0	0	0.9	0	0.9
CD109	NTM	9606.ENSP00000287097	9606.ENSP00000396722	0	0	0	0	0.051	0.05	0.9	0.043	0.902
CD109	LY6K	9606.ENSP00000287097	9606.ENSP00000292430	0	0	0	0	0.076	0	0.9	0	0.903
CD109	MDGA2	9606.ENSP00000287097	9606.ENSP00000382178	0	0	0	0	0	0	0.9	0.086	0.904
CD109	MSLN	9606.ENSP00000287097	9606.ENSP00000372313	0	0	0	0	0.061	0	0.9	0.267	0.925
CD177	SLC2A5	9606.ENSP00000479536	9606.ENSP00000366641	0	0	0	0	0	0	0.9	0.061	0.902
CD34	THY1	9606.ENSP00000310036	9606.ENSP00000284240	0	0	0	0	0.062	0	0	0.929	0.931
CDC20	TRIP13	9606.ENSP00000361540	9606.ENSP00000166345	0	0	0	0	0.898	0.853	0	0.485	0.991
CDC20	CDC6	9606.ENSP00000361540	9606.ENSP00000209728	0	0	0	0	0.76	0.556	0	0.791	0.975
CDC20	CENPM	9606.ENSP00000361540	9606.ENSP00000215980	0	0	0	0	0.806	0	0.9	0.342	0.986
CDC20	NCAPH	9606.ENSP00000361540	9606.ENSP00000240423	0	0	0	0	0.884	0	0	0.464	0.935
CDC20	DLGAP5	9606.ENSP00000361540	9606.ENSP00000247191	0	0	0	0	0.983	0	0	0.479	0.99
CDC20	FAM64A	9606.ENSP00000361540	9606.ENSP00000250056	0	0	0	0	0.871	0	0	0.284	0.903
CDC20	NCAPG	9606.ENSP00000361540	9606.ENSP00000251496	0	0	0	0	0.94	0.05	0	0.438	0.965
CDC20	TROAP	9606.ENSP00000361540	9606.ENSP00000257909	0	0	0	0	0.925	0	0	0.098	0.93
CDC20	KIF23	9606.ENSP00000361540	9606.ENSP00000260363	0	0	0	0	0.971	0.078	0	0.518	0.986
CDC20	KIF11	9606.ENSP00000361540	9606.ENSP00000260731	0	0	0	0	0.981	0.26	0	0.656	0.995
CDC20	NDC80	9606.ENSP00000361540	9606.ENSP00000261597	0	0	0	0	0.975	0	0.9	0.687	0.999
CDC20	PKMYT1	9606.ENSP00000361540	9606.ENSP00000262300	0	0	0	0	0.583	0.696	0	0.651	0.952
CDC20	KIF18A	9606.ENSP00000361540	9606.ENSP00000263181	0	0	0	0	0.511	0.463	0.9	0.308	0.979
CDC20	SGOL1	9606.ENSP00000361540	9606.ENSP00000263753	0	0	0	0	0.843	0	0.9	0.59	0.993
CDC20	MCM2	9606.ENSP00000361540	9606.ENSP00000265056	0	0	0	0	0.918	0.127	0	0.559	0.965
CDC20	CENPE	9606.ENSP00000361540	9606.ENSP00000265148	0	0	0	0	0.97	0.128	0.9	0.767	0.999
CDC20	NUF2	9606.ENSP00000361540	9606.ENSP00000271452	0	0	0	0	0.922	0	0.9	0.582	0.996
CDC20	CDCA5	9606.ENSP00000361540	9606.ENSP00000275517	0	0	0	0	0.838	0	0.9	0.454	0.99
CDC20	CENPU	9606.ENSP00000361540	9606.ENSP00000281453	0	0	0	0	0.551	0	0.9	0.312	0.966
CDC20	SPC25	9606.ENSP00000361540	9606.ENSP00000282074	0	0	0	0	0.659	0	0.9	0.214	0.97
CDC20	SKA1	9606.ENSP00000361540	9606.ENSP00000285116	0	0	0	0	0.811	0	0.9	0.293	0.985
CDC20	MAD2L1	9606.ENSP00000361540	9606.ENSP00000296509	0	0	0	0	0.978	0.999	0.9	0.874	0.999
CDC20	MELK	9606.ENSP00000361540	9606.ENSP00000298048	0	0	0	0	0.963	0.056	0	0.445	0.979
CDC20	KIAA0101	9606.ENSP00000361540	9606.ENSP00000300035	0	0	0	0	0.941	0	0	0.272	0.955
CDC20	PLK1	9606.ENSP00000361540	9606.ENSP00000300093	0	0	0	0	0.981	0.994	0.9	0.912	0.999
CDC20	TPX2	9606.ENSP00000361540	9606.ENSP00000300403	0	0	0	0	0.922	0	0	0.473	0.957
CDC20	CDT1	9606.ENSP00000361540	9606.ENSP00000301019	0	0	0	0	0.923	0.27	0	0.506	0.97
CDC20	PSMA8	9606.ENSP00000361540	9606.ENSP00000311121	0	0	0	0	0	0	0.9	0	0.9
CDC20	DYNC1I1	9606.ENSP00000361540	9606.ENSP00000320130	0	0	0	0	0	0	0.9	0.05	0.9
CDC20	CDC25C	9606.ENSP00000361540	9606.ENSP00000321656	0	0	0	0	0.642	0.41	0	0.647	0.919
CDC20	KIF15	9606.ENSP00000361540	9606.ENSP00000324020	0	0	0	0	0.892	0.078	0	0.341	0.929
CDC20	TACC3	9606.ENSP00000361540	9606.ENSP00000326550	0	0	0	0	0.964	0	0	0.307	0.974
CDC20	TRIM50	9606.ENSP00000361540	9606.ENSP00000327994	0	0	0	0	0.061	0	0.9	0	0.902
CDC20	TRAIP	9606.ENSP00000361540	9606.ENSP00000328203	0	0	0	0	0.367	0	0.9	0.154	0.941
CDC20	ERCC6L	9606.ENSP00000361540	9606.ENSP00000334675	0	0	0	0	0.421	0.085	0.9	0.193	0.951
CDC20	CDKN3	9606.ENSP00000361540	9606.ENSP00000335357	0	0	0	0	0.825	0.161	0	0.427	0.908
CDC20	CENPA	9606.ENSP00000361540	9606.ENSP00000336868	0	0	0	0	0.781	0.091	0.9	0.581	0.99
CDC20	FOXM1	9606.ENSP00000361540	9606.ENSP00000342307	0	0	0	0	0.96	0.05	0	0.683	0.987
CDC20	CENPL	9606.ENSP00000361540	9606.ENSP00000348527	0	0	0	0	0.168	0	0.9	0.073	0.916
CDC20	UBE2C	9606.ENSP00000361540	9606.ENSP00000348838	0	0	0	0	0.982	0.905	0.9	0.866	0.999
CDC20	SGOL2	9606.ENSP00000361540	9606.ENSP00000350447	0	0	0	0	0.441	0	0.9	0.427	0.965
CDC20	RRM2	9606.ENSP00000361540	9606.ENSP00000353770	0	0	0	0	0.927	0.08	0	0.571	0.968
CDC20	CENPF	9606.ENSP00000361540	9606.ENSP00000355922	0	0	0	0	0.839	0	0.9	0.596	0.992
CDC20	NEK2	9606.ENSP00000361540	9606.ENSP00000355966	0	0	0	0	0.948	0.993	0.9	0.81	0.999
CDC20	MKI67	9606.ENSP00000361540	9606.ENSP00000357643	0	0	0	0	0.94	0	0	0.543	0.971
CDC20	TTK	9606.ENSP00000361540	9606.ENSP00000358813	0	0	0	0	0.982	0.586	0	0.737	0.997
CDC20	UBE2U	9606.ENSP00000361540	9606.ENSP00000360116	0	0	0	0	0	0.145	0.9	0.055	0.912
CDC20	CEP55	9606.ENSP00000361540	9606.ENSP00000360540	0	0	0	0	0.898	0	0	0.531	0.95
CDC20	KIF2C	9606.ENSP00000361540	9606.ENSP00000361298	0	0	0	0	0.958	0.078	0.9	0.579	0.998
CDC20	TRIM63	9606.ENSP00000361540	9606.ENSP00000363390	0	0	0	0	0.061	0	0.9	0	0.902
CDC20	FBXL16	9606.ENSP00000361540	9606.ENSP00000380746	0	0	0	0	0.064	0.062	0.9	0.053	0.905
CDC20	FBXW10	9606.ENSP00000361540	9606.ENSP00000379025	0	0	0	0.554	0.064	0.099	0.9	0.094	0.91
CDC20	HJURP	9606.ENSP00000361540	9606.ENSP00000414109	0	0	0	0	0.889	0	0	0.266	0.915
CDC20	KIF18B	9606.ENSP00000361540	9606.ENSP00000465992	0	0	0	0	0.895	0.185	0	0.099	0.916
CDC20	TRIM71	9606.ENSP00000361540	9606.ENSP00000373272	0	0	0	0	0.096	0	0.9	0.155	0.917
CDC20	RACGAP1	9606.ENSP00000361540	9606.ENSP00000404190	0	0	0	0	0.882	0	0	0.348	0.92
CDC20	UHRF1	9606.ENSP00000361540	9606.ENSP00000479617	0	0	0	0	0.894	0	0	0.284	0.921
CDC20	GTSE1	9606.ENSP00000361540	9606.ENSP00000415430	0	0	0	0	0.876	0	0	0.398	0.922
CDC20	CDC45	9606.ENSP00000361540	9606.ENSP00000405726	0	0	0	0	0.858	0.05	0	0.538	0.932
CDC20	CENPK	9606.ENSP00000361540	9606.ENSP00000379911	0	0	0	0	0.377	0	0.9	0.203	0.946
CDC20	KIFC1	9606.ENSP00000361540	9606.ENSP00000393963	0	0	0	0	0.919	0.078	0	0.453	0.955
CDC20	ECT2	9606.ENSP00000361540	9606.ENSP00000376457	0	0	0	0	0.938	0	0	0.348	0.957
CDC20	KIF4A	9606.ENSP00000361540	9606.ENSP00000363524	0	0	0	0	0.937	0.078	0	0.417	0.963
CDC20	CENPI	9606.ENSP00000361540	9606.ENSP00000362018	0	0	0	0	0.518	0	0.9	0.355	0.966
CDC20	FBXO43	9606.ENSP00000361540	9606.ENSP00000403293	0	0	0	0	0.136	0.502	0.8	0.736	0.974
CDC20	PBK	9606.ENSP00000361540	9606.ENSP00000428489	0	0	0	0	0.964	0.082	0	0.327	0.976
CDC20	CDCA3	9606.ENSP00000361540	9606.ENSP00000442068	0	0	0	0	0.942	0	0	0.62	0.977
CDC20	KIF20A	9606.ENSP00000361540	9606.ENSP00000378356	0	0	0	0	0.958	0.078	0	0.52	0.979
CDC20	PRC1	9606.ENSP00000361540	9606.ENSP00000377793	0	0	0	0	0.967	0	0	0.56	0.985
CDC20	TOP2A	9606.ENSP00000361540	9606.ENSP00000411532	0	0	0	0	0.968	0	0	0.579	0.986
CDC20	ZWINT	9606.ENSP00000361540	9606.ENSP00000363055	0	0	0	0	0.771	0	0.9	0.543	0.988
CDC20	NUSAP1	9606.ENSP00000361540	9606.ENSP00000453403	0	0	0	0	0.981	0	0	0.552	0.991
CDC20	SPC24	9606.ENSP00000361540	9606.ENSP00000465075	0	0	0	0	0.876	0	0.9	0.473	0.992
CDC20	CDK1	9606.ENSP00000361540	9606.ENSP00000378699	0	0	0	0	0.982	0.82	0.9	0.933	0.999
CDC20	PTTG1	9606.ENSP00000361540	9606.ENSP00000377536	0	0	0	0	0.931	0.993	0.9	0.886	0.999
CDC20	CDCA8	9606.ENSP00000361540	9606.ENSP00000362146	0	0	0	0	0.988	0	0.9	0.599	0.999
CDC25A	CDC6	9606.ENSP00000303706	9606.ENSP00000209728	0	0	0	0	0.581	0.387	0	0.671	0.908
CDC25A	PKMYT1	9606.ENSP00000303706	9606.ENSP00000262300	0	0	0	0	0.555	0.731	0	0.667	0.956
CDC25A	PLK1	9606.ENSP00000303706	9606.ENSP00000300093	0	0	0	0	0.396	0.099	0.9	0.709	0.982
CDC25A	PSMA8	9606.ENSP00000303706	9606.ENSP00000311121	0	0	0	0	0	0	0.9	0	0.9
CDC25A	CDC25C	9606.ENSP00000303706	9606.ENSP00000321656	0	0	0	0.826	0.526	0	0.9	0.814	0.957
CDC25A	E2F1	9606.ENSP00000303706	9606.ENSP00000345571	0	0	0	0	0.346	0	0.9	0.516	0.965
CDC25A	FOXM1	9606.ENSP00000303706	9606.ENSP00000342307	0	0	0	0	0.543	0.087	0.9	0.763	0.988
CDC25A	CDK1	9606.ENSP00000303706	9606.ENSP00000378699	0	0	0	0	0.573	0.571	0.9	0.908	0.998
CDC25C	PKMYT1	9606.ENSP00000321656	9606.ENSP00000262300	0	0	0	0	0.343	0.731	0	0.692	0.941
CDC25C	PLK1	9606.ENSP00000321656	9606.ENSP00000300093	0	0	0	0	0.608	0.416	0.9	0.92	0.997
CDC25C	SFN	9606.ENSP00000321656	9606.ENSP00000340989	0	0	0	0	0.061	0.525	0.9	0.377	0.968
CDC25C	CDK1	9606.ENSP00000321656	9606.ENSP00000378699	0	0	0	0	0.702	0.571	0.9	0.945	0.999
CDC45	CDC6	9606.ENSP00000405726	9606.ENSP00000209728	0	0	0	0	0.898	0.124	0.9	0.92	0.999
CDC45	ORC6	9606.ENSP00000405726	9606.ENSP00000219097	0	0	0	0	0.376	0.921	0.9	0.759	0.998
CDC45	GMNN	9606.ENSP00000405726	9606.ENSP00000230056	0	0	0	0	0.568	0	0	0.832	0.924
CDC45	NCAPG	9606.ENSP00000405726	9606.ENSP00000251496	0	0	0	0	0.954	0	0	0.31	0.967
CDC45	KIF11	9606.ENSP00000405726	9606.ENSP00000260731	0	0	0	0	0.937	0	0	0.217	0.948
CDC45	GINS1	9606.ENSP00000405726	9606.ENSP00000262460	0	0	0	0	0.651	0.767	0.9	0.852	0.998
CDC45	MCM2	9606.ENSP00000405726	9606.ENSP00000265056	0	0	0	0	0.917	0.853	0.9	0.961	0.999
CDC45	TICRR	9606.ENSP00000405726	9606.ENSP00000268138	0	0	0	0	0.682	0	0	0.932	0.977
CDC45	MAD2L1	9606.ENSP00000405726	9606.ENSP00000296509	0	0	0	0	0.872	0	0	0.464	0.928
CDC45	MELK	9606.ENSP00000405726	9606.ENSP00000298048	0	0	0	0	0.885	0	0	0.284	0.914
CDC45	CDT1	9606.ENSP00000405726	9606.ENSP00000301019	0	0	0	0	0.852	0	0	0.918	0.987
CDC45	CLSPN	9606.ENSP00000405726	9606.ENSP00000312995	0	0	0	0	0.486	0.379	0.9	0.735	0.99
CDC45	E2F1	9606.ENSP00000405726	9606.ENSP00000345571	0	0	0	0	0.568	0	0.9	0.298	0.967
CDC45	RRM2	9606.ENSP00000405726	9606.ENSP00000353770	0	0	0	0	0.898	0	0	0.249	0.92
CDC45	EXO1	9606.ENSP00000405726	9606.ENSP00000355506	0	0	0	0	0.902	0	0	0.527	0.951
CDC45	DTL	9606.ENSP00000405726	9606.ENSP00000355958	0	0	0	0	0.897	0	0	0.261	0.921
CDC45	TTK	9606.ENSP00000405726	9606.ENSP00000358813	0	0	0	0	0.876	0	0	0.293	0.909
CDC45	ORC1	9606.ENSP00000405726	9606.ENSP00000360623	0	0	0	0	0.869	0.983	0.9	0.758	0.999
CDC45	RAD51	9606.ENSP00000405726	9606.ENSP00000372088	0	0	0	0	0.808	0.052	0	0.701	0.941
CDC45	PRC1	9606.ENSP00000405726	9606.ENSP00000377793	0	0	0	0	0.958	0	0	0.051	0.958
CDC45	CDK1	9606.ENSP00000405726	9606.ENSP00000378699	0	0	0	0	0.891	0	0	0.58	0.952
CDC45	CDC7	9606.ENSP00000405726	9606.ENSP00000393139	0	0	0	0	0.431	0.264	0.9	0.919	0.996
CDC45	RECQL4	9606.ENSP00000405726	9606.ENSP00000482313	0	0	0	0	0.407	0	0	0.875	0.922
CDC45	MCM10	9606.ENSP00000405726	9606.ENSP00000418268	0	0	0	0	0.885	0.945	0.9	0.961	0.999
CDC6	PSMA8	9606.ENSP00000209728	9606.ENSP00000311121	0	0	0	0	0	0	0.9	0.063	0.902
CDC6	EXO1	9606.ENSP00000209728	9606.ENSP00000355506	0.073	0	0	0	0.867	0	0	0.337	0.911
CDC6	NCAPG	9606.ENSP00000209728	9606.ENSP00000251496	0	0	0	0	0.905	0	0	0.138	0.914
CDC6	RRM2	9606.ENSP00000209728	9606.ENSP00000353770	0	0	0	0	0.861	0	0	0.503	0.928
CDC6	KIF11	9606.ENSP00000209728	9606.ENSP00000260731	0	0	0	0	0.9	0.054	0	0.301	0.928
CDC6	PLK1	9606.ENSP00000209728	9606.ENSP00000300093	0	0	0	0	0.567	0.379	0	0.786	0.937
CDC6	CDCA7	9606.ENSP00000209728	9606.ENSP00000306968	0	0	0	0	0.917	0	0	0.304	0.94
CDC6	CLSPN	9606.ENSP00000209728	9606.ENSP00000312995	0	0	0	0	0.522	0	0.9	0.471	0.972
CDC6	UBE2C	9606.ENSP00000209728	9606.ENSP00000348838	0	0	0	0	0.723	0.085	0.9	0.437	0.983
CDC6	DTL	9606.ENSP00000209728	9606.ENSP00000355958	0	0	0	0	0.967	0	0	0.678	0.989
CDC6	E2F1	9606.ENSP00000209728	9606.ENSP00000345571	0	0	0	0	0.289	0.715	0.9	0.631	0.991
CDC6	CDK1	9606.ENSP00000209728	9606.ENSP00000378699	0	0	0	0	0.815	0.72	0	0.867	0.992
CDC6	CDC7	9606.ENSP00000209728	9606.ENSP00000393139	0	0	0	0	0.379	0.157	0.9	0.896	0.993
CDC6	GMNN	9606.ENSP00000209728	9606.ENSP00000230056	0	0	0	0	0.588	0	0.9	0.875	0.994
CDC6	MCM10	9606.ENSP00000209728	9606.ENSP00000418268	0	0	0	0	0.821	0.834	0.9	0.87	0.999
CDC6	ORC6	9606.ENSP00000209728	9606.ENSP00000219097	0	0	0	0	0.725	0.912	0.9	0.894	0.999
CDC6	ORC1	9606.ENSP00000209728	9606.ENSP00000360623	0	0	0	0.69	0.941	0.998	0.9	0.912	0.999
CDC6	MCM2	9606.ENSP00000209728	9606.ENSP00000265056	0.052	0	0	0	0.829	0.947	0.9	0.949	0.999
CDC6	CDT1	9606.ENSP00000209728	9606.ENSP00000301019	0	0	0	0	0.941	0.837	0.9	0.957	0.999
CDC7	ORC6	9606.ENSP00000393139	9606.ENSP00000219097	0	0	0	0	0.221	0.974	0.9	0.604	0.999
CDC7	MCM2	9606.ENSP00000393139	9606.ENSP00000265056	0	0	0	0	0.417	0.974	0.9	0.944	0.999
CDC7	CDT1	9606.ENSP00000393139	9606.ENSP00000301019	0	0	0	0	0.216	0	0.9	0.924	0.993
CDC7	CLSPN	9606.ENSP00000393139	9606.ENSP00000312995	0	0	0	0	0.249	0.379	0.9	0.795	0.989
CDC7	ORC1	9606.ENSP00000393139	9606.ENSP00000360623	0	0	0	0	0.336	0.909	0.9	0.656	0.997
CDC7	CDK1	9606.ENSP00000393139	9606.ENSP00000378699	0	0	0	0	0.595	0.356	0	0.703	0.916
CDC7	MCM10	9606.ENSP00000393139	9606.ENSP00000418268	0	0	0	0	0.389	0.951	0.9	0.869	0.999
CDCA2	NUF2	9606.ENSP00000328228	9606.ENSP00000271452	0	0	0	0	0.658	0	0	0.73	0.904
CDCA2	PBK	9606.ENSP00000328228	9606.ENSP00000428489	0	0	0	0	0.871	0	0	0.314	0.907
CDCA3	DLGAP5	9606.ENSP00000442068	9606.ENSP00000247191	0	0	0	0	0.892	0	0	0.374	0.929
CDCA3	KIF11	9606.ENSP00000442068	9606.ENSP00000260731	0	0	0	0	0.879	0	0	0.399	0.924
CDCA3	CENPE	9606.ENSP00000442068	9606.ENSP00000265148	0	0	0	0	0.894	0	0	0.274	0.92
CDCA3	MAD2L1	9606.ENSP00000442068	9606.ENSP00000296509	0	0	0	0	0.866	0	0	0.302	0.903
CDCA3	KIAA0101	9606.ENSP00000442068	9606.ENSP00000300035	0	0	0	0	0.868	0	0	0.561	0.939
CDCA3	TPX2	9606.ENSP00000442068	9606.ENSP00000300403	0	0	0	0	0.877	0	0	0.241	0.902
CDCA3	UBE2C	9606.ENSP00000442068	9606.ENSP00000348838	0	0	0	0	0.929	0	0	0.43	0.957
CDCA3	RRM2	9606.ENSP00000442068	9606.ENSP00000353770	0	0	0	0	0.867	0	0	0.287	0.901
CDCA3	TTK	9606.ENSP00000442068	9606.ENSP00000358813	0	0	0	0	0.888	0	0	0.293	0.917
CDCA3	KIF2C	9606.ENSP00000442068	9606.ENSP00000361298	0	0	0	0	0.9	0	0	0.329	0.93
CDCA3	CDCA8	9606.ENSP00000442068	9606.ENSP00000362146	0	0	0	0	0.924	0	0	0.573	0.966
CDCA3	KIF4A	9606.ENSP00000442068	9606.ENSP00000363524	0	0	0	0	0.881	0	0	0.35	0.919
CDCA3	KIF20A	9606.ENSP00000442068	9606.ENSP00000378356	0	0	0	0	0.896	0	0	0.473	0.942
CDCA3	CDK1	9606.ENSP00000442068	9606.ENSP00000378699	0	0	0	0	0.942	0	0	0.528	0.971
CDCA3	KIFC1	9606.ENSP00000442068	9606.ENSP00000393963	0	0	0	0	0.864	0	0	0.315	0.903
CDCA3	TOP2A	9606.ENSP00000442068	9606.ENSP00000411532	0	0	0	0	0.943	0	0	0.31	0.959
CDCA3	PBK	9606.ENSP00000442068	9606.ENSP00000428489	0	0	0	0	0.938	0	0	0.388	0.96
CDCA3	NUSAP1	9606.ENSP00000442068	9606.ENSP00000453403	0	0	0	0	0.884	0	0	0.389	0.926
CDCA5	CENPM	9606.ENSP00000275517	9606.ENSP00000215980	0	0	0	0	0.462	0	0.9	0.349	0.961
CDCA5	NDC80	9606.ENSP00000275517	9606.ENSP00000261597	0	0	0	0	0.751	0	0.9	0.276	0.98
CDCA5	KIF18A	9606.ENSP00000275517	9606.ENSP00000263181	0	0	0	0	0.394	0	0.9	0.174	0.945
CDCA5	SGOL1	9606.ENSP00000275517	9606.ENSP00000263753	0	0	0	0	0.718	0.361	0.9	0.673	0.993
CDCA5	CENPE	9606.ENSP00000275517	9606.ENSP00000265148	0	0	0	0	0.711	0	0.9	0.319	0.978
CDCA5	NUF2	9606.ENSP00000275517	9606.ENSP00000271452	0	0	0	0	0.765	0	0.9	0.581	0.989
CDCA5	DYNC1I1	9606.ENSP00000275517	9606.ENSP00000320130	0	0	0	0	0	0	0.9	0	0.9
CDCA5	CENPL	9606.ENSP00000275517	9606.ENSP00000348527	0	0	0	0	0.129	0	0.9	0.174	0.921
CDCA5	CENPK	9606.ENSP00000275517	9606.ENSP00000379911	0	0	0	0	0.389	0	0.9	0.077	0.938
CDCA5	CENPI	9606.ENSP00000275517	9606.ENSP00000362018	0	0	0	0	0.493	0	0.9	0	0.947
CDCA5	ERCC6L	9606.ENSP00000275517	9606.ENSP00000334675	0	0	0	0	0.414	0	0.9	0.256	0.952
CDCA5	CENPU	9606.ENSP00000275517	9606.ENSP00000281453	0	0	0	0	0.566	0	0.9	0	0.954
CDCA5	SPC25	9606.ENSP00000275517	9606.ENSP00000282074	0	0	0	0	0.434	0	0.9	0.297	0.956
CDCA5	SGOL2	9606.ENSP00000275517	9606.ENSP00000350447	0	0	0	0	0.389	0	0.9	0.511	0.967
CDCA5	SPC24	9606.ENSP00000275517	9606.ENSP00000465075	0	0	0	0	0.597	0	0.9	0.256	0.967
CDCA5	KIF2C	9606.ENSP00000275517	9606.ENSP00000361298	0	0	0	0	0.67	0	0.9	0.416	0.979
CDCA5	MAD2L1	9606.ENSP00000275517	9606.ENSP00000296509	0	0	0	0	0.718	0	0.9	0.349	0.98
CDCA5	SKA1	9606.ENSP00000275517	9606.ENSP00000285116	0	0	0	0	0.672	0	0.9	0.477	0.981
CDCA5	CENPA	9606.ENSP00000275517	9606.ENSP00000336868	0	0	0	0	0.748	0	0.9	0.363	0.982
CDCA5	CENPF	9606.ENSP00000275517	9606.ENSP00000355922	0	0	0	0	0.714	0.121	0.9	0.367	0.982
CDCA5	ZWINT	9606.ENSP00000275517	9606.ENSP00000363055	0	0	0	0	0.758	0	0.9	0.415	0.984
CDCA5	PLK1	9606.ENSP00000275517	9606.ENSP00000300093	0	0	0	0	0.596	0.294	0.9	0.712	0.99
CDCA5	CDCA8	9606.ENSP00000275517	9606.ENSP00000362146	0	0	0	0	0.856	0	0.9	0.59	0.993
CDCA5	CDK1	9606.ENSP00000275517	9606.ENSP00000378699	0	0	0	0	0.752	0.294	0.9	0.712	0.994
CDCA7	MCM2	9606.ENSP00000306968	9606.ENSP00000265056	0	0	0	0	0.961	0	0	0.334	0.972
CDCA7	UHRF1	9606.ENSP00000306968	9606.ENSP00000479617	0	0	0	0	0.897	0	0	0.23	0.917
CDCA7	HELLS	9606.ENSP00000306968	9606.ENSP00000377601	0	0	0	0	0.864	0	0	0.474	0.925
CDCA8	CENPM	9606.ENSP00000362146	9606.ENSP00000215980	0	0	0	0	0.809	0.075	0.9	0.278	0.985
CDCA8	OIP5	9606.ENSP00000362146	9606.ENSP00000220514	0	0	0	0	0.901	0	0	0.308	0.928
CDCA8	NCAPH	9606.ENSP00000362146	9606.ENSP00000240423	0	0	0	0	0.855	0	0	0.338	0.9
CDCA8	DLGAP5	9606.ENSP00000362146	9606.ENSP00000247191	0	0	0	0	0.95	0	0	0.443	0.971
CDCA8	NCAPG	9606.ENSP00000362146	9606.ENSP00000251496	0	0	0	0	0.932	0	0	0.348	0.953
CDCA8	TROAP	9606.ENSP00000362146	9606.ENSP00000257909	0	0	0	0	0.918	0	0	0.108	0.924
CDCA8	KIF23	9606.ENSP00000362146	9606.ENSP00000260363	0	0	0	0	0.875	0	0.9	0.529	0.993
CDCA8	KIF11	9606.ENSP00000362146	9606.ENSP00000260731	0	0	0	0	0.966	0	0	0.537	0.983
CDCA8	NDC80	9606.ENSP00000362146	9606.ENSP00000261597	0	0	0	0	0.96	0	0.9	0.567	0.998
CDCA8	KIF18A	9606.ENSP00000362146	9606.ENSP00000263181	0	0	0	0	0.608	0	0.9	0.221	0.966
CDCA8	SGOL1	9606.ENSP00000362146	9606.ENSP00000263753	0	0	0	0	0.867	0.313	0.9	0.619	0.996
CDCA8	CENPE	9606.ENSP00000362146	9606.ENSP00000265148	0	0	0	0	0.96	0	0.9	0.611	0.998
CDCA8	NUF2	9606.ENSP00000362146	9606.ENSP00000271452	0	0	0	0	0.875	0	0.9	0.594	0.994
CDCA8	CENPU	9606.ENSP00000362146	9606.ENSP00000281453	0	0	0	0	0.573	0	0.9	0.223	0.963
CDCA8	SPC25	9606.ENSP00000362146	9606.ENSP00000282074	0	0	0	0	0.642	0	0.9	0.297	0.972
CDCA8	SKA1	9606.ENSP00000362146	9606.ENSP00000285116	0	0	0	0	0.761	0	0.9	0.415	0.984
CDCA8	MAD2L1	9606.ENSP00000362146	9606.ENSP00000296509	0	0	0	0	0.968	0	0.9	0.516	0.998
CDCA8	MELK	9606.ENSP00000362146	9606.ENSP00000298048	0	0	0	0	0.91	0	0	0.44	0.947
CDCA8	KIAA0101	9606.ENSP00000362146	9606.ENSP00000300035	0	0	0	0	0.922	0	0	0.117	0.928
CDCA8	PLK1	9606.ENSP00000362146	9606.ENSP00000300093	0	0	0	0	0.956	0	0.9	0.599	0.998
CDCA8	TPX2	9606.ENSP00000362146	9606.ENSP00000300403	0	0	0	0	0.926	0	0	0.49	0.961
CDCA8	SHCBP1	9606.ENSP00000362146	9606.ENSP00000306473	0	0	0	0	0.855	0	0	0.5	0.924
CDCA8	DYNC1I1	9606.ENSP00000362146	9606.ENSP00000320130	0	0	0	0	0	0	0.9	0	0.9
CDCA8	KIF15	9606.ENSP00000362146	9606.ENSP00000324020	0	0	0	0	0.891	0	0	0.398	0.931
CDCA8	TACC3	9606.ENSP00000362146	9606.ENSP00000326550	0	0	0	0	0.909	0	0	0.269	0.93
CDCA8	ERCC6L	9606.ENSP00000362146	9606.ENSP00000334675	0	0	0	0	0.645	0	0.9	0.133	0.966
CDCA8	CENPA	9606.ENSP00000362146	9606.ENSP00000336868	0	0	0	0	0.793	0	0.9	0.627	0.991
CDCA8	FOXM1	9606.ENSP00000362146	9606.ENSP00000342307	0	0	0	0	0.907	0	0	0.305	0.933
CDCA8	CENPL	9606.ENSP00000362146	9606.ENSP00000348527	0	0	0	0	0.162	0	0.9	0.067	0.915
CDCA8	UBE2C	9606.ENSP00000362146	9606.ENSP00000348838	0	0	0	0	0.961	0	0	0.423	0.976
CDCA8	SGOL2	9606.ENSP00000362146	9606.ENSP00000350447	0	0	0	0	0.547	0.313	0.9	0.451	0.98
CDCA8	RRM2	9606.ENSP00000362146	9606.ENSP00000353770	0	0	0	0	0.918	0	0	0.29	0.939
CDCA8	CENPF	9606.ENSP00000362146	9606.ENSP00000355922	0	0	0	0	0.89	0	0.9	0.537	0.994
CDCA8	NEK2	9606.ENSP00000362146	9606.ENSP00000355966	0	0	0	0	0.915	0	0	0.52	0.957
CDCA8	MKI67	9606.ENSP00000362146	9606.ENSP00000357643	0	0	0	0	0.922	0	0	0.258	0.939
CDCA8	TTK	9606.ENSP00000362146	9606.ENSP00000358813	0	0	0	0	0.971	0.294	0	0.472	0.988
CDCA8	CEP55	9606.ENSP00000362146	9606.ENSP00000360540	0	0	0	0	0.912	0	0	0.417	0.946
CDCA8	KIF2C	9606.ENSP00000362146	9606.ENSP00000361298	0	0	0	0	0.931	0.114	0.9	0.658	0.997
CDCA8	CENPI	9606.ENSP00000362146	9606.ENSP00000362018	0	0	0	0	0.491	0	0.9	0.352	0.964
CDCA8	ECT2	9606.ENSP00000362146	9606.ENSP00000376457	0	0	0	0	0.852	0	0	0.374	0.903
CDCA8	HJURP	9606.ENSP00000362146	9606.ENSP00000414109	0	0	0	0	0.891	0	0	0.172	0.906
CDCA8	E2F8	9606.ENSP00000362146	9606.ENSP00000481103	0	0	0	0	0.869	0	0	0.5	0.932
CDCA8	KIFC1	9606.ENSP00000362146	9606.ENSP00000393963	0	0	0	0	0.905	0	0	0.377	0.938
CDCA8	KIF4A	9606.ENSP00000362146	9606.ENSP00000363524	0	0	0	0	0.889	0	0	0.486	0.94
CDCA8	PBK	9606.ENSP00000362146	9606.ENSP00000428489	0	0	0	0	0.915	0	0	0.33	0.941
CDCA8	PTTG1	9606.ENSP00000362146	9606.ENSP00000377536	0	0	0	0	0.905	0	0	0.534	0.953
CDCA8	CENPK	9606.ENSP00000362146	9606.ENSP00000379911	0	0	0	0	0.378	0	0.9	0.361	0.956
CDCA8	TOP2A	9606.ENSP00000362146	9606.ENSP00000411532	0	0	0	0	0.935	0	0	0.41	0.96
CDCA8	NUSAP1	9606.ENSP00000362146	9606.ENSP00000453403	0	0	0	0	0.966	0	0	0.479	0.981
CDCA8	SPC24	9606.ENSP00000362146	9606.ENSP00000465075	0	0	0	0	0.743	0	0.9	0.349	0.981
CDCA8	ZWINT	9606.ENSP00000362146	9606.ENSP00000363055	0	0	0	0	0.792	0	0.9	0.352	0.985
CDCA8	RACGAP1	9606.ENSP00000362146	9606.ENSP00000404190	0	0	0	0	0.812	0	0.9	0.524	0.99
CDCA8	KIF20A	9606.ENSP00000362146	9606.ENSP00000378356	0	0	0	0	0.92	0.116	0.9	0.571	0.996
CDCA8	CDK1	9606.ENSP00000362146	9606.ENSP00000378699	0	0	0	0	0.971	0	0.9	0.616	0.998
CDH10	CDH17	9606.ENSP00000264463	9606.ENSP00000027335	0	0	0	0.643	0	0	0.9	0.581	0.92
CDH10	CDH9	9606.ENSP00000264463	9606.ENSP00000231021	0	0	0	0.975	0.135	0.365	0.9	0.831	0.941
CDH10	CDH24	9606.ENSP00000264463	9606.ENSP00000380517	0	0	0	0.938	0	0	0.9	0.296	0.901
CDH10	CDH7	9606.ENSP00000264463	9606.ENSP00000381058	0	0	0	0.964	0.063	0	0.9	0.634	0.904
CDH10	CDH8	9606.ENSP00000264463	9606.ENSP00000462701	0	0	0	0.961	0.091	0	0.9	0.665	0.907
CDH10	CDH12	9606.ENSP00000264463	9606.ENSP00000371689	0	0	0	0.965	0.096	0	0.9	0.664	0.907
CDH10	CDH18	9606.ENSP00000264463	9606.ENSP00000425093	0	0	0	0.962	0.184	0	0.9	0.628	0.916
CDH10	CDH13	9606.ENSP00000264463	9606.ENSP00000268613	0	0	0	0.669	0.06	0	0.9	0.549	0.919
CDH12	CDH17	9606.ENSP00000371689	9606.ENSP00000027335	0	0	0	0.634	0	0	0.9	0.71	0.925
CDH12	CDH9	9606.ENSP00000371689	9606.ENSP00000231021	0	0	0	0.962	0.122	0	0.9	0.655	0.91
CDH12	CDH13	9606.ENSP00000371689	9606.ENSP00000268613	0	0	0	0.677	0	0	0.9	0.532	0.916
CDH12	CDH24	9606.ENSP00000371689	9606.ENSP00000380517	0	0	0	0.932	0	0	0.9	0.211	0.901
CDH12	CDH8	9606.ENSP00000371689	9606.ENSP00000462701	0	0	0	0.956	0.063	0	0.9	0.74	0.905
CDH12	CDH7	9606.ENSP00000371689	9606.ENSP00000381058	0	0	0	0.961	0.086	0.365	0.9	0.569	0.938
CDH12	CDH18	9606.ENSP00000371689	9606.ENSP00000425093	0	0	0	0.961	0.09	0.365	0.9	0.902	0.939
CDH13	CDH17	9606.ENSP00000268613	9606.ENSP00000027335	0	0	0	0.678	0	0	0.9	0.702	0.922
CDH13	CDH9	9606.ENSP00000268613	9606.ENSP00000231021	0	0	0	0.654	0.061	0	0.9	0.552	0.92
CDH13	CDH24	9606.ENSP00000268613	9606.ENSP00000380517	0	0	0	0.664	0	0	0.9	0.224	0.906
CDH13	CDH7	9606.ENSP00000268613	9606.ENSP00000381058	0	0	0	0.71	0.082	0	0.9	0.445	0.915
CDH13	CDH18	9606.ENSP00000268613	9606.ENSP00000425093	0	0	0	0.69	0.08	0	0.9	0.45	0.916
CDH13	CDH8	9606.ENSP00000268613	9606.ENSP00000462701	0	0	0	0.675	0.082	0	0.9	0.558	0.921
CDH17	CDH24	9606.ENSP00000027335	9606.ENSP00000380517	0	0	0	0.621	0	0	0.9	0.399	0.914
CDH17	CDH9	9606.ENSP00000027335	9606.ENSP00000231021	0	0	0	0.615	0	0	0.9	0.556	0.92
CDH17	CDH18	9606.ENSP00000027335	9606.ENSP00000425093	0	0	0	0.654	0	0	0.9	0.641	0.921
CDH17	CDH7	9606.ENSP00000027335	9606.ENSP00000381058	0	0	0	0.626	0	0	0.9	0.653	0.923
CDH17	CDH8	9606.ENSP00000027335	9606.ENSP00000462701	0	0	0	0.636	0	0	0.9	0.71	0.925
CDH18	CDH9	9606.ENSP00000425093	9606.ENSP00000231021	0	0	0	0.959	0.108	0.365	0.9	0.545	0.939
CDH18	CDH24	9606.ENSP00000425093	9606.ENSP00000380517	0	0	0	0.94	0	0.294	0.9	0.211	0.927
CDH18	CDH7	9606.ENSP00000425093	9606.ENSP00000381058	0	0	0	0.964	0.121	0	0.9	0.546	0.91
CDH18	CDH8	9606.ENSP00000425093	9606.ENSP00000462701	0	0	0	0.958	0.113	0	0.9	0.599	0.909
CDH24	CDH9	9606.ENSP00000380517	9606.ENSP00000231021	0	0	0	0.936	0	0	0.9	0.042	0.9
CDH24	CDH8	9606.ENSP00000380517	9606.ENSP00000462701	0	0	0	0.946	0	0	0.9	0.171	0.9
CDH24	CDH7	9606.ENSP00000380517	9606.ENSP00000381058	0	0	0	0.939	0.061	0	0.9	0.383	0.904
CDH7	CDH9	9606.ENSP00000381058	9606.ENSP00000231021	0	0	0	0.962	0.064	0.365	0.9	0.631	0.936
CDH7	CDH8	9606.ENSP00000381058	9606.ENSP00000462701	0	0	0	0.964	0.118	0	0.9	0.645	0.91
CDH8	CDH9	9606.ENSP00000462701	9606.ENSP00000231021	0	0	0	0.957	0.084	0	0.9	0.684	0.907
CDK1	TRIP13	9606.ENSP00000378699	9606.ENSP00000166345	0	0	0	0	0.959	0.082	0	0.19	0.967
CDK1	CENPM	9606.ENSP00000378699	9606.ENSP00000215980	0	0	0	0	0.759	0	0.9	0.19	0.978
CDK1	ORC6	9606.ENSP00000378699	9606.ENSP00000219097	0	0	0	0	0.351	0	0.9	0.343	0.953
CDK1	GMNN	9606.ENSP00000378699	9606.ENSP00000230056	0	0	0	0	0.852	0.696	0	0.68	0.984
CDK1	NCAPH	9606.ENSP00000378699	9606.ENSP00000240423	0	0	0	0	0.745	0.32	0.9	0.384	0.987
CDK1	DLGAP5	9606.ENSP00000378699	9606.ENSP00000247191	0	0	0	0	0.991	0.32	0	0.489	0.996
CDK1	NCAPG	9606.ENSP00000378699	9606.ENSP00000251496	0	0	0	0	0.992	0.326	0.9	0.385	0.999
CDK1	KIF23	9606.ENSP00000378699	9606.ENSP00000260363	0	0	0	0	0.982	0.157	0	0.774	0.996
CDK1	KIF11	9606.ENSP00000378699	9606.ENSP00000260731	0	0	0	0	0.988	0.457	0	0.901	0.999
CDK1	NDC80	9606.ENSP00000378699	9606.ENSP00000261597	0	0	0	0	0.982	0	0.9	0.541	0.999
CDK1	PKMYT1	9606.ENSP00000378699	9606.ENSP00000262300	0	0	0.312	0.67	0.55	0.882	0.9	0.902	0.996
CDK1	KIF18A	9606.ENSP00000378699	9606.ENSP00000263181	0	0	0	0	0.722	0.174	0.9	0.324	0.982
CDK1	SGOL1	9606.ENSP00000378699	9606.ENSP00000263753	0	0	0	0	0.85	0.084	0.9	0.676	0.994
CDK1	TUBB4A	9606.ENSP00000378699	9606.ENSP00000264071	0	0	0	0	0.081	0.07	0.9	0.092	0.912
CDK1	MCM2	9606.ENSP00000378699	9606.ENSP00000265056	0	0	0	0	0.947	0.157	0	0.613	0.981
CDK1	CENPE	9606.ENSP00000378699	9606.ENSP00000265148	0	0	0	0	0.97	0.174	0.9	0.619	0.998
CDK1	PLK4	9606.ENSP00000378699	9606.ENSP00000270861	0	0	0	0.713	0.817	0.261	0.9	0.596	0.987
CDK1	NUF2	9606.ENSP00000378699	9606.ENSP00000271452	0	0	0	0	0.969	0	0.9	0.394	0.997
CDK1	CENPU	9606.ENSP00000378699	9606.ENSP00000281453	0	0	0	0	0.821	0	0.9	0.329	0.986
CDK1	SPC25	9606.ENSP00000378699	9606.ENSP00000282074	0	0	0	0	0.919	0	0.9	0	0.991
CDK1	SKA1	9606.ENSP00000378699	9606.ENSP00000285116	0	0	0	0	0.804	0	0.9	0.308	0.985
CDK1	MAD2L1	9606.ENSP00000378699	9606.ENSP00000296509	0	0	0	0	0.991	0.175	0.9	0.616	0.999
CDK1	MELK	9606.ENSP00000378699	9606.ENSP00000298048	0	0	0	0.711	0.978	0.124	0	0.387	0.982
CDK1	KIAA0101	9606.ENSP00000378699	9606.ENSP00000300035	0	0	0	0	0.942	0	0	0.207	0.952
CDK1	PLK1	9606.ENSP00000378699	9606.ENSP00000300093	0	0	0	0.627	0.963	0.267	0.9	0.961	0.998
CDK1	TPX2	9606.ENSP00000378699	9606.ENSP00000300403	0	0	0	0	0.925	0	0.9	0.721	0.997
CDK1	CDT1	9606.ENSP00000378699	9606.ENSP00000301019	0	0	0	0	0.687	0.861	0	0.788	0.99
CDK1	TK1	9606.ENSP00000378699	9606.ENSP00000301634	0	0	0	0	0.781	0.379	0	0.567	0.936
CDK1	PSMA8	9606.ENSP00000378699	9606.ENSP00000311121	0	0	0	0	0.061	0.059	0.9	0	0.903
CDK1	DYNC1I1	9606.ENSP00000378699	9606.ENSP00000320130	0	0	0	0	0.063	0	0.9	0.072	0.905
CDK1	EZH2	9606.ENSP00000378699	9606.ENSP00000320147	0	0	0	0	0.682	0.39	0	0.79	0.956
CDK1	KIF15	9606.ENSP00000378699	9606.ENSP00000324020	0	0	0	0	0.849	0.157	0	0.564	0.939
CDK1	TACC3	9606.ENSP00000378699	9606.ENSP00000326550	0	0	0	0	0.958	0	0	0.341	0.971
CDK1	ERCC6L	9606.ENSP00000378699	9606.ENSP00000334675	0	0	0	0	0.686	0.157	0.9	0.412	0.982
CDK1	CDKN3	9606.ENSP00000378699	9606.ENSP00000335357	0	0	0	0	0.913	0.458	0	0.766	0.988
CDK1	CENPA	9606.ENSP00000378699	9606.ENSP00000336868	0	0	0	0	0.82	0.157	0.9	0.729	0.995
CDK1	SFN	9606.ENSP00000378699	9606.ENSP00000340989	0	0	0	0	0.061	0.414	0.9	0.33	0.958
CDK1	FOXM1	9606.ENSP00000378699	9606.ENSP00000342307	0	0	0	0	0.84	0.424	0.9	0.748	0.997
CDK1	E2F1	9606.ENSP00000378699	9606.ENSP00000345571	0	0	0	0	0.256	0.461	0.9	0.579	0.98
CDK1	CENPL	9606.ENSP00000378699	9606.ENSP00000348527	0	0	0	0	0.137	0	0.9	0.078	0.913
CDK1	UBE2C	9606.ENSP00000378699	9606.ENSP00000348838	0	0	0	0	0.978	0.1	0.9	0.584	0.999
CDK1	SGOL2	9606.ENSP00000378699	9606.ENSP00000350447	0	0	0	0	0.42	0	0.9	0.378	0.96
CDK1	RRM2	9606.ENSP00000378699	9606.ENSP00000353770	0	0	0	0	0.972	0.379	0	0.536	0.991
CDK1	EXO1	9606.ENSP00000378699	9606.ENSP00000355506	0	0	0	0	0.857	0.101	0	0.521	0.933
CDK1	CENPF	9606.ENSP00000378699	9606.ENSP00000355922	0	0	0	0	0.859	0	0.9	0.524	0.992
CDK1	DTL	9606.ENSP00000378699	9606.ENSP00000355958	0	0	0	0	0.855	0	0	0.409	0.91
CDK1	NEK2	9606.ENSP00000378699	9606.ENSP00000355966	0	0	0.345	0.74	0.922	0	0.9	0.597	0.993
CDK1	MKI67	9606.ENSP00000378699	9606.ENSP00000357643	0	0	0	0	0.841	0.379	0	0.599	0.957
CDK1	TTK	9606.ENSP00000378699	9606.ENSP00000358813	0	0	0	0.65	0.989	0.314	0	0.632	0.993
CDK1	CEP55	9606.ENSP00000378699	9606.ENSP00000360540	0	0	0	0	0.933	0.305	0	0.431	0.971
CDK1	ORC1	9606.ENSP00000378699	9606.ENSP00000360623	0	0	0	0	0.483	0.376	0.9	0.425	0.979
CDK1	KIF2C	9606.ENSP00000378699	9606.ENSP00000361298	0	0	0	0	0.901	0.157	0.9	0.74	0.997
CDK1	CENPI	9606.ENSP00000378699	9606.ENSP00000362018	0	0	0	0	0.408	0	0.9	0.268	0.952
CDK1	ZWINT	9606.ENSP00000378699	9606.ENSP00000363055	0	0	0	0	0.843	0	0.9	0.348	0.988
CDK1	KIF4A	9606.ENSP00000378699	9606.ENSP00000363524	0	0	0	0	0.935	0.157	0	0.695	0.981
CDK1	HIST1H2BL	9606.ENSP00000378699	9606.ENSP00000366618	0	0	0	0	0.078	0.05	0.9	0.09	0.909
CDK1	TP73	9606.ENSP00000378699	9606.ENSP00000367545	0	0	0	0	0.061	0.348	0.9	0.233	0.946
CDK1	RAD51	9606.ENSP00000378699	9606.ENSP00000372088	0	0	0	0	0.808	0.164	0	0.609	0.931
CDK1	ECT2	9606.ENSP00000378699	9606.ENSP00000376457	0	0	0	0	0.957	0.393	0	0.762	0.993
CDK1	HMMR	9606.ENSP00000378699	9606.ENSP00000377492	0	0	0	0	0.926	0	0.9	0.23	0.993
CDK1	PTTG1	9606.ENSP00000378699	9606.ENSP00000377536	0	0	0	0	0.942	0.379	0	0.848	0.994
CDK1	PRC1	9606.ENSP00000378699	9606.ENSP00000377793	0	0	0	0	0.967	0.47	0	0.411	0.988
CDK1	KIF20A	9606.ENSP00000378699	9606.ENSP00000378356	0	0	0	0	0.963	0.157	0	0.734	0.991
CDK1	MCM10	9606.ENSP00000378699	9606.ENSP00000418268	0	0	0	0	0.841	0	0	0.462	0.911
CDK1	HIST1H2BH	9606.ENSP00000378699	9606.ENSP00000479169	0	0	0	0	0.088	0.05	0.9	0.174	0.918
CDK1	RASGRF1	9606.ENSP00000378699	9606.ENSP00000405963	0	0	0	0	0.052	0.085	0.9	0.238	0.925
CDK1	HJURP	9606.ENSP00000378699	9606.ENSP00000414109	0	0	0	0	0.836	0	0	0.58	0.928
CDK1	KIFC1	9606.ENSP00000378699	9606.ENSP00000393963	0	0	0	0	0.813	0.157	0	0.608	0.933
CDK1	FBXO43	9606.ENSP00000378699	9606.ENSP00000403293	0	0	0	0	0.087	0	0.8	0.802	0.96
CDK1	CENPK	9606.ENSP00000378699	9606.ENSP00000379911	0	0	0	0	0.716	0	0.9	0.165	0.974
CDK1	RACGAP1	9606.ENSP00000378699	9606.ENSP00000404190	0	0	0	0	0.955	0.358	0	0.579	0.986
CDK1	GTSE1	9606.ENSP00000378699	9606.ENSP00000415430	0	0	0	0	0.703	0	0.9	0.58	0.986
CDK1	STMN1	9606.ENSP00000378699	9606.ENSP00000410452	0	0	0	0	0.782	0.379	0.9	0.4	0.99
CDK1	SPC24	9606.ENSP00000378699	9606.ENSP00000465075	0	0	0	0	0.877	0	0.9	0.345	0.991
CDK1	TOP2A	9606.ENSP00000378699	9606.ENSP00000411532	0	0	0	0	0.986	0.386	0	0.597	0.996
CDK1	NUSAP1	9606.ENSP00000378699	9606.ENSP00000453403	0	0	0	0	0.992	0	0	0.644	0.997
CDK1	PBK	9606.ENSP00000378699	9606.ENSP00000428489	0	0	0	0	0.99	0.412	0	0.66	0.997
CDKN2A	TWIST1	9606.ENSP00000418915	9606.ENSP00000242261	0	0	0	0	0.062	0	0.9	0.673	0.966
CDKN2A	CDKN2C	9606.ENSP00000418915	9606.ENSP00000262662	0	0	0.223	0.827	0.097	0.294	0.9	0.771	0.941
CDKN2A	MCM2	9606.ENSP00000418915	9606.ENSP00000265056	0	0	0	0	0.06	0.873	0	0.421	0.925
CDKN2A	FOXM1	9606.ENSP00000418915	9606.ENSP00000342307	0	0	0	0	0	0.085	0.9	0.685	0.968
CDKN2A	E2F1	9606.ENSP00000418915	9606.ENSP00000345571	0	0	0	0	0.083	0.392	0.9	0.805	0.987
CDKN2A	E2F2	9606.ENSP00000418915	9606.ENSP00000355249	0	0	0	0	0.055	0.062	0.9	0.63	0.962
CDKN3	DLGAP5	9606.ENSP00000335357	9606.ENSP00000247191	0	0	0	0	0.913	0.058	0	0.086	0.919
CDKN3	NCAPG	9606.ENSP00000335357	9606.ENSP00000251496	0	0	0	0	0.904	0.053	0	0.058	0.907
CDKN3	MAD2L1	9606.ENSP00000335357	9606.ENSP00000296509	0	0	0	0	0.847	0.311	0	0.37	0.928
CDKN3	MELK	9606.ENSP00000335357	9606.ENSP00000298048	0	0	0	0	0.9	0.182	0	0.097	0.919
CDKN3	PRC1	9606.ENSP00000335357	9606.ENSP00000377793	0	0	0	0	0.819	0.267	0	0.376	0.91
CDKN3	PBK	9606.ENSP00000335357	9606.ENSP00000428489	0	0	0	0	0.904	0.131	0	0.113	0.92
CDKN3	PTTG1	9606.ENSP00000335357	9606.ENSP00000377536	0	0	0	0	0.907	0	0	0.262	0.928
CDT1	ORC6	9606.ENSP00000301019	9606.ENSP00000219097	0	0	0	0	0.292	0.294	0.9	0.904	0.994
CDT1	GMNN	9606.ENSP00000301019	9606.ENSP00000230056	0	0	0	0	0.378	0.981	0.9	0.977	0.999
CDT1	MCM2	9606.ENSP00000301019	9606.ENSP00000265056	0	0	0	0	0.935	0.412	0.9	0.916	0.999
CDT1	E2F1	9606.ENSP00000301019	9606.ENSP00000345571	0	0	0	0	0.405	0	0.9	0.394	0.96
CDT1	DTL	9606.ENSP00000301019	9606.ENSP00000355958	0	0	0	0	0.887	0.379	0	0.949	0.996
CDT1	MCM10	9606.ENSP00000301019	9606.ENSP00000418268	0	0	0	0	0.805	0.186	0.9	0.874	0.997
CDT1	ORC1	9606.ENSP00000301019	9606.ENSP00000360623	0	0	0	0	0.853	0.994	0.9	0.815	0.999
CEACAM7	PRSS21	9606.ENSP00000006724	9606.ENSP00000005995	0	0	0	0	0	0	0.9	0.141	0.91
CEACAM7	LYPD1	9606.ENSP00000006724	9606.ENSP00000380605	0	0	0	0	0	0	0.9	0	0.9
CEACAM7	MSLN	9606.ENSP00000006724	9606.ENSP00000372313	0	0	0	0	0	0	0.9	0	0.9
CEACAM7	LY6K	9606.ENSP00000006724	9606.ENSP00000292430	0	0	0	0	0	0	0.9	0	0.9
CEACAM7	PRND	9606.ENSP00000006724	9606.ENSP00000306900	0	0	0	0	0	0	0.9	0	0.9
CEACAM7	GP2	9606.ENSP00000006724	9606.ENSP00000370767	0	0	0	0	0	0	0.9	0	0.9
CEACAM7	MDGA1	9606.ENSP00000006724	9606.ENSP00000402584	0	0	0	0	0	0	0.9	0	0.9
CEACAM7	MDGA2	9606.ENSP00000006724	9606.ENSP00000382178	0	0	0	0	0	0	0.9	0	0.9
CEACAM7	LY6H	9606.ENSP00000006724	9606.ENSP00000399485	0	0	0	0	0	0	0.9	0	0.9
CEACAM7	PSCA	9606.ENSP00000006724	9606.ENSP00000301258	0	0	0	0	0	0	0.9	0	0.9
CEACAM7	THY1	9606.ENSP00000006724	9606.ENSP00000284240	0	0	0	0	0	0	0.9	0.056	0.901
CEACAM7	LYPD8	9606.ENSP00000006724	9606.ENSP00000466070	0	0	0	0	0.065	0	0.9	0	0.902
CEACAM7	NTM	9606.ENSP00000006724	9606.ENSP00000396722	0	0	0	0	0	0	0.9	0.099	0.906
CEL	CPA1	9606.ENSP00000361151	9606.ENSP00000011292	0	0	0	0	0.872	0	0	0.39	0.919
CEL	LPL	9606.ENSP00000361151	9606.ENSP00000309757	0	0	0	0	0	0	0.9	0.536	0.951
CEL	PNLIP	9606.ENSP00000361151	9606.ENSP00000358223	0	0	0	0	0.38	0	0.8	0.705	0.96
CELA3A	CPA1	9606.ENSP00000290122	9606.ENSP00000011292	0	0	0	0	0.765	0.671	0	0.633	0.969
CELA3B	CPA1	9606.ENSP00000338369	9606.ENSP00000011292	0	0	0	0	0.839	0.671	0	0.642	0.979
CENPA	CENPM	9606.ENSP00000336868	9606.ENSP00000215980	0	0	0	0	0.77	0.222	0.9	0.748	0.994
CENPA	OIP5	9606.ENSP00000336868	9606.ENSP00000220514	0	0	0	0	0.78	0.542	0.9	0.548	0.994
CENPA	NCAPG	9606.ENSP00000336868	9606.ENSP00000251496	0	0	0	0	0.894	0.157	0	0.262	0.928
CENPA	KIF11	9606.ENSP00000336868	9606.ENSP00000260731	0	0	0	0	0.808	0.08	0	0.515	0.906
CENPA	NDC80	9606.ENSP00000336868	9606.ENSP00000261597	0	0	0	0	0.788	0.166	0.9	0.721	0.994
CENPA	KIF18A	9606.ENSP00000336868	9606.ENSP00000263181	0	0	0	0	0.559	0.08	0.9	0.43	0.973
CENPA	SGOL1	9606.ENSP00000336868	9606.ENSP00000263753	0	0	0	0	0	0	0.9	0.501	0.947
CENPA	CENPE	9606.ENSP00000336868	9606.ENSP00000265148	0	0	0	0	0.778	0.08	0.9	0.71	0.993
CENPA	NUF2	9606.ENSP00000336868	9606.ENSP00000271452	0	0	0	0	0.574	0.162	0.9	0.716	0.988
CENPA	CENPU	9606.ENSP00000336868	9606.ENSP00000281453	0	0	0	0	0.563	0.328	0.9	0.75	0.991
CENPA	SPC25	9606.ENSP00000336868	9606.ENSP00000282074	0	0	0	0	0.728	0	0.9	0.151	0.974
CENPA	SKA1	9606.ENSP00000336868	9606.ENSP00000285116	0	0	0	0	0.571	0	0.9	0.53	0.978
CENPA	MAD2L1	9606.ENSP00000336868	9606.ENSP00000296509	0	0	0	0	0.796	0.17	0.9	0.49	0.99
CENPA	MELK	9606.ENSP00000336868	9606.ENSP00000298048	0	0	0	0	0.821	0.075	0	0.446	0.9
CENPA	PLK1	9606.ENSP00000336868	9606.ENSP00000300093	0	0	0	0	0.681	0.078	0.9	0.645	0.988
CENPA	TPX2	9606.ENSP00000336868	9606.ENSP00000300403	0	0	0	0	0.823	0	0	0.497	0.907
CENPA	DYNC1I1	9606.ENSP00000336868	9606.ENSP00000320130	0	0	0	0	0	0	0.9	0	0.9
CENPA	ERCC6L	9606.ENSP00000336868	9606.ENSP00000334675	0	0	0	0	0.561	0.176	0.9	0.408	0.975
CENPA	HIST1H3D	9606.ENSP00000336868	9606.ENSP00000366999	0	0	0	0.905	0	0	0.9	0.669	0.906
CENPA	HIST1H3J	9606.ENSP00000336868	9606.ENSP00000352252	0	0	0	0.905	0.063	0	0.9	0.468	0.906
CENPA	HIST1H3B	9606.ENSP00000336868	9606.ENSP00000484841	0	0	0	0.905	0.076	0	0.9	0.468	0.907
CENPA	HIST1H3G	9606.ENSP00000336868	9606.ENSP00000484638	0	0	0	0.905	0.07	0	0.9	0.468	0.907
CENPA	TOP2A	9606.ENSP00000336868	9606.ENSP00000411532	0	0	0	0	0.811	0.18	0	0.463	0.909
CENPA	KIF20A	9606.ENSP00000336868	9606.ENSP00000378356	0	0	0	0	0.833	0.08	0	0.474	0.912
CENPA	HIST1H2BH	9606.ENSP00000336868	9606.ENSP00000479169	0	0	0	0	0.138	0.266	0.9	0.09	0.934
CENPA	HIST1H2BL	9606.ENSP00000336868	9606.ENSP00000366618	0	0	0	0	0.136	0.266	0.9	0.104	0.935
CENPA	UBE2C	9606.ENSP00000336868	9606.ENSP00000348838	0	0	0	0	0.892	0.189	0	0.322	0.935
CENPA	HIST3H2A	9606.ENSP00000336868	9606.ENSP00000355656	0	0	0	0	0.166	0.265	0.9	0.087	0.936
CENPA	SGOL2	9606.ENSP00000336868	9606.ENSP00000350447	0	0	0	0	0.19	0	0.9	0.33	0.941
CENPA	SPC24	9606.ENSP00000336868	9606.ENSP00000465075	0	0	0	0	0.154	0	0.9	0.63	0.966
CENPA	CENPL	9606.ENSP00000336868	9606.ENSP00000348527	0	0	0	0	0.076	0	0.9	0.71	0.97
CENPA	CENPW	9606.ENSP00000336868	9606.ENSP00000357308	0	0	0	0	0.214	0	0.9	0.67	0.971
CENPA	CENPK	9606.ENSP00000336868	9606.ENSP00000379911	0	0	0	0	0.183	0.222	0.9	0.673	0.976
CENPA	CENPI	9606.ENSP00000336868	9606.ENSP00000362018	0	0	0	0	0.179	0.339	0.9	0.794	0.987
CENPA	ZWINT	9606.ENSP00000336868	9606.ENSP00000363055	0	0	0	0	0.778	0	0.9	0.59	0.99
CENPA	CENPF	9606.ENSP00000336868	9606.ENSP00000355922	0	0	0	0	0.786	0	0.9	0.672	0.992
CENPA	KIF2C	9606.ENSP00000336868	9606.ENSP00000361298	0	0	0	0	0.818	0.08	0.9	0.67	0.993
CENPA	HIST1H4E	9606.ENSP00000336868	9606.ENSP00000484789	0	0	0	0	0.076	0.847	0.9	0.582	0.993
CENPA	HIST1H4H	9606.ENSP00000336868	9606.ENSP00000366956	0	0	0	0	0	0.847	0.9	0.582	0.993
CENPA	HJURP	9606.ENSP00000336868	9606.ENSP00000414109	0	0	0	0	0.82	0.937	0.9	0.925	0.999
CENPE	CENPM	9606.ENSP00000265148	9606.ENSP00000215980	0	0	0	0	0.429	0	0.9	0.398	0.962
CENPE	DLGAP5	9606.ENSP00000265148	9606.ENSP00000247191	0	0	0	0	0.969	0.056	0	0.505	0.984
CENPE	NCAPG	9606.ENSP00000265148	9606.ENSP00000251496	0	0	0	0	0.967	0.064	0	0.378	0.979
CENPE	KIF23	9606.ENSP00000265148	9606.ENSP00000260363	0	0	0	0.595	0.884	0	0.9	0.763	0.991
CENPE	KIF11	9606.ENSP00000265148	9606.ENSP00000260731	0	0	0	0.624	0.969	0.194	0.9	0.891	0.998
CENPE	NDC80	9606.ENSP00000265148	9606.ENSP00000261597	0	0	0	0	0.961	0.526	0.9	0.833	0.999
CENPE	KIF18A	9606.ENSP00000265148	9606.ENSP00000263181	0	0	0	0.643	0.774	0.263	0.9	0.877	0.987
CENPE	SGOL1	9606.ENSP00000265148	9606.ENSP00000263753	0	0	0	0	0.689	0	0.9	0.618	0.987
CENPE	UBE2C	9606.ENSP00000265148	9606.ENSP00000348838	0	0	0	0	0.821	0.084	0	0.461	0.904
CENPE	SKA3	9606.ENSP00000265148	9606.ENSP00000319417	0	0	0	0	0.759	0	0	0.627	0.906
CENPE	DYNC1I1	9606.ENSP00000265148	9606.ENSP00000320130	0	0	0	0	0	0.093	0.9	0.102	0.911
CENPE	KIF5A	9606.ENSP00000265148	9606.ENSP00000408979	0	0	0	0.641	0.062	0	0.9	0.546	0.92
CENPE	KIF1A	9606.ENSP00000265148	9606.ENSP00000438388	0	0	0	0.562	0	0	0.9	0.537	0.922
CENPE	TACC3	9606.ENSP00000265148	9606.ENSP00000326550	0	0	0	0	0.891	0.084	0	0.364	0.931
CENPE	CEP55	9606.ENSP00000265148	9606.ENSP00000360540	0	0	0	0	0.885	0.085	0	0.462	0.938
CENPE	NEK2	9606.ENSP00000265148	9606.ENSP00000355966	0	0	0	0	0.881	0	0	0.532	0.942
CENPE	CENPL	9606.ENSP00000265148	9606.ENSP00000348527	0	0	0	0	0.125	0	0.9	0.471	0.949
CENPE	ECT2	9606.ENSP00000265148	9606.ENSP00000376457	0	0	0	0	0.937	0.054	0	0.389	0.96
CENPE	TPX2	9606.ENSP00000265148	9606.ENSP00000300403	0	0	0	0	0.883	0	0	0.675	0.96
CENPE	SPC25	9606.ENSP00000265148	9606.ENSP00000282074	0	0	0	0	0.567	0	0.9	0.219	0.963
CENPE	CENPK	9606.ENSP00000265148	9606.ENSP00000379911	0	0	0	0	0.372	0	0.9	0.499	0.965
CENPE	MKI67	9606.ENSP00000265148	9606.ENSP00000357643	0	0	0	0	0.955	0	0	0.262	0.965
CENPE	KIF18B	9606.ENSP00000265148	9606.ENSP00000465992	0	0	0	0.63	0.459	0.263	0.9	0.687	0.967
CENPE	NUSAP1	9606.ENSP00000265148	9606.ENSP00000453403	0	0	0	0	0.956	0	0	0.318	0.969
CENPE	ERCC6L	9606.ENSP00000265148	9606.ENSP00000334675	0	0	0	0	0.628	0.056	0.9	0.294	0.971
CENPE	SPC24	9606.ENSP00000265148	9606.ENSP00000465075	0	0	0	0	0.393	0	0.9	0.564	0.971
CENPE	KIFC1	9606.ENSP00000265148	9606.ENSP00000393963	0	0	0	0.637	0.515	0.267	0.9	0.785	0.972
CENPE	SGOL2	9606.ENSP00000265148	9606.ENSP00000350447	0	0	0	0	0.458	0	0.9	0.555	0.973
CENPE	TOP2A	9606.ENSP00000265148	9606.ENSP00000411532	0	0	0	0	0.961	0	0	0.455	0.978
CENPE	CENPI	9606.ENSP00000265148	9606.ENSP00000362018	0	0	0	0	0.4	0	0.9	0.677	0.978
CENPE	PRC1	9606.ENSP00000265148	9606.ENSP00000377793	0	0	0	0	0.887	0.47	0	0.723	0.982
CENPE	CENPU	9606.ENSP00000265148	9606.ENSP00000281453	0	0	0	0	0.691	0	0.9	0.522	0.983
CENPE	ZWINT	9606.ENSP00000265148	9606.ENSP00000363055	0	0	0	0	0.677	0	0.9	0.617	0.986
CENPE	RACGAP1	9606.ENSP00000265148	9606.ENSP00000404190	0	0	0	0	0.703	0.186	0.9	0.612	0.989
CENPE	KIF2C	9606.ENSP00000265148	9606.ENSP00000361298	0	0	0	0.616	0.869	0	0.9	0.771	0.99
CENPE	SKA1	9606.ENSP00000265148	9606.ENSP00000285116	0	0	0	0	0.64	0.294	0.9	0.692	0.991
CENPE	KIF15	9606.ENSP00000265148	9606.ENSP00000324020	0	0	0	0.606	0.909	0	0.9	0.62	0.992
CENPE	TTK	9606.ENSP00000265148	9606.ENSP00000358813	0	0	0	0	0.983	0.079	0	0.568	0.992
CENPE	KIF4A	9606.ENSP00000265148	9606.ENSP00000363524	0	0	0	0.631	0.917	0	0.9	0.745	0.993
CENPE	KIF20A	9606.ENSP00000265148	9606.ENSP00000378356	0	0	0	0.572	0.923	0	0.9	0.61	0.994
CENPE	MAD2L1	9606.ENSP00000265148	9606.ENSP00000296509	0	0	0	0	0.924	0.567	0.9	0.713	0.998
CENPE	PLK1	9606.ENSP00000265148	9606.ENSP00000300093	0	0	0	0	0.923	0.171	0.9	0.734	0.998
CENPE	NUF2	9606.ENSP00000265148	9606.ENSP00000271452	0	0	0	0	0.825	0.45	0.9	0.831	0.998
CENPE	CENPF	9606.ENSP00000265148	9606.ENSP00000355922	0	0	0	0	0.957	0.379	0.9	0.894	0.999
CENPF	CENPM	9606.ENSP00000355922	9606.ENSP00000215980	0	0	0	0	0.575	0	0.9	0.446	0.974
CENPF	DLGAP5	9606.ENSP00000355922	9606.ENSP00000247191	0	0	0	0	0.932	0	0	0.477	0.963
CENPF	NCAPG	9606.ENSP00000355922	9606.ENSP00000251496	0	0	0	0	0.922	0	0	0.446	0.955
CENPF	KIF23	9606.ENSP00000355922	9606.ENSP00000260363	0	0	0	0	0.835	0	0	0.48	0.91
CENPF	KIF11	9606.ENSP00000355922	9606.ENSP00000260731	0	0	0	0	0.926	0	0	0.548	0.965
CENPF	NDC80	9606.ENSP00000355922	9606.ENSP00000261597	0	0	0	0	0.909	0	0.9	0.635	0.996
CENPF	KIF18A	9606.ENSP00000355922	9606.ENSP00000263181	0	0	0	0	0.778	0	0.9	0.496	0.987
CENPF	SGOL1	9606.ENSP00000355922	9606.ENSP00000263753	0	0	0	0	0.598	0	0.9	0.476	0.977
CENPF	NUF2	9606.ENSP00000355922	9606.ENSP00000271452	0	0	0	0	0.892	0	0.9	0.601	0.995
CENPF	CENPU	9606.ENSP00000355922	9606.ENSP00000281453	0	0	0	0	0.683	0.114	0.9	0.361	0.979
CENPF	SPC25	9606.ENSP00000355922	9606.ENSP00000282074	0	0	0	0	0.427	0	0.9	0.225	0.951
CENPF	SKA1	9606.ENSP00000355922	9606.ENSP00000285116	0	0	0	0	0.348	0	0.9	0.473	0.962
CENPF	MAD2L1	9606.ENSP00000355922	9606.ENSP00000296509	0	0	0	0	0.802	0	0.9	0.529	0.989
CENPF	MELK	9606.ENSP00000355922	9606.ENSP00000298048	0	0	0	0	0.874	0	0	0.427	0.924
CENPF	PLK1	9606.ENSP00000355922	9606.ENSP00000300093	0	0	0	0	0.637	0	0.9	0.589	0.983
CENPF	TPX2	9606.ENSP00000355922	9606.ENSP00000300403	0	0	0	0	0.891	0	0	0.51	0.944
CENPF	SKA3	9606.ENSP00000355922	9606.ENSP00000319417	0	0	0	0	0.588	0	0.9	0.448	0.975
CENPF	DYNC1I1	9606.ENSP00000355922	9606.ENSP00000320130	0	0	0	0	0	0	0.9	0.105	0.906
CENPF	KIF15	9606.ENSP00000355922	9606.ENSP00000324020	0	0	0	0	0.902	0	0	0.506	0.949
CENPF	ERCC6L	9606.ENSP00000355922	9606.ENSP00000334675	0	0	0	0	0.561	0	0.9	0.065	0.955
CENPF	FOXM1	9606.ENSP00000355922	9606.ENSP00000342307	0	0	0	0	0.82	0	0.9	0.572	0.991
CENPF	CENPL	9606.ENSP00000355922	9606.ENSP00000348527	0	0	0	0	0.155	0	0.9	0.422	0.946
CENPF	UBE2C	9606.ENSP00000355922	9606.ENSP00000348838	0	0	0	0	0.85	0	0	0.51	0.923
CENPF	SGOL2	9606.ENSP00000355922	9606.ENSP00000350447	0	0	0	0	0.598	0	0.9	0.441	0.975
CENPF	RRM2	9606.ENSP00000355922	9606.ENSP00000353770	0	0	0	0	0.915	0	0	0.423	0.948
CENPF	KIF4A	9606.ENSP00000355922	9606.ENSP00000363524	0	0	0	0	0.837	0	0	0.423	0.902
CENPF	HJURP	9606.ENSP00000355922	9606.ENSP00000414109	0	0	0	0	0.893	0	0	0.279	0.92
CENPF	HMMR	9606.ENSP00000355922	9606.ENSP00000377492	0	0	0	0	0.88	0	0	0.409	0.926
CENPF	PTTG1	9606.ENSP00000355922	9606.ENSP00000377536	0	0	0	0	0.856	0	0	0.592	0.939
CENPF	DEPDC1	9606.ENSP00000355922	9606.ENSP00000412292	0	0	0	0	0.919	0	0	0.342	0.944
CENPF	PBK	9606.ENSP00000355922	9606.ENSP00000428489	0	0	0	0	0.917	0	0	0.42	0.95
CENPF	KIF20A	9606.ENSP00000355922	9606.ENSP00000378356	0	0	0	0	0.927	0	0	0.477	0.96
CENPF	SPC24	9606.ENSP00000355922	9606.ENSP00000465075	0	0	0	0	0.275	0	0.9	0.51	0.961
CENPF	MKI67	9606.ENSP00000355922	9606.ENSP00000357643	0	0	0	0	0.931	0	0	0.473	0.962
CENPF	TTK	9606.ENSP00000355922	9606.ENSP00000358813	0	0	0	0	0.932	0	0	0.474	0.962
CENPF	NEK2	9606.ENSP00000355922	9606.ENSP00000355966	0	0	0	0	0.893	0	0	0.675	0.963
CENPF	CEP55	9606.ENSP00000355922	9606.ENSP00000360540	0	0	0	0	0.934	0	0	0.53	0.967
CENPF	NUSAP1	9606.ENSP00000355922	9606.ENSP00000453403	0	0	0	0	0.95	0	0	0.49	0.973
CENPF	CENPK	9606.ENSP00000355922	9606.ENSP00000379911	0	0	0	0	0.545	0	0.9	0.477	0.974
CENPF	CENPI	9606.ENSP00000355922	9606.ENSP00000362018	0	0	0	0	0.363	0	0.9	0.644	0.975
CENPF	TOP2A	9606.ENSP00000355922	9606.ENSP00000411532	0	0	0	0	0.963	0	0	0.566	0.983
CENPF	ZWINT	9606.ENSP00000355922	9606.ENSP00000363055	0	0	0	0	0.678	0	0.9	0.557	0.984
CENPF	KIF2C	9606.ENSP00000355922	9606.ENSP00000361298	0	0	0	0	0.884	0	0.9	0.63	0.995
CENPI	CENPM	9606.ENSP00000362018	9606.ENSP00000215980	0	0	0	0	0.231	0.466	0.9	0.785	0.99
CENPI	OIP5	9606.ENSP00000362018	9606.ENSP00000220514	0	0	0	0	0.229	0	0.9	0.385	0.948
CENPI	NDC80	9606.ENSP00000362018	9606.ENSP00000261597	0	0	0	0	0.585	0.192	0.9	0.773	0.991
CENPI	KIF18A	9606.ENSP00000362018	9606.ENSP00000263181	0	0	0	0	0.269	0	0.9	0.472	0.958
CENPI	SGOL1	9606.ENSP00000362018	9606.ENSP00000263753	0	0	0	0	0.639	0	0.9	0.285	0.971
CENPI	NUF2	9606.ENSP00000362018	9606.ENSP00000271452	0	0	0	0	0.491	0	0.9	0.809	0.989
CENPI	CENPU	9606.ENSP00000362018	9606.ENSP00000281453	0	0	0	0	0.221	0.826	0.9	0.837	0.997
CENPI	SPC25	9606.ENSP00000362018	9606.ENSP00000282074	0	0	0	0	0.357	0	0.9	0.167	0.941
CENPI	SKA1	9606.ENSP00000362018	9606.ENSP00000285116	0	0	0	0	0.276	0	0.9	0.541	0.963
CENPI	MAD2L1	9606.ENSP00000362018	9606.ENSP00000296509	0	0	0	0	0.501	0	0.9	0.381	0.966
CENPI	PLK1	9606.ENSP00000362018	9606.ENSP00000300093	0	0	0	0	0.413	0	0.9	0.393	0.961
CENPI	DYNC1I1	9606.ENSP00000362018	9606.ENSP00000320130	0	0	0	0	0	0	0.9	0	0.9
CENPI	ERCC6L	9606.ENSP00000362018	9606.ENSP00000334675	0	0	0	0	0.598	0.132	0.9	0.074	0.963
CENPI	CENPL	9606.ENSP00000362018	9606.ENSP00000348527	0	0	0	0	0.16	0.443	0.9	0.838	0.991
CENPI	SGOL2	9606.ENSP00000362018	9606.ENSP00000350447	0	0	0	0	0.451	0	0.9	0.162	0.95
CENPI	CENPW	9606.ENSP00000362018	9606.ENSP00000357308	0	0	0	0	0.218	0	0.9	0.736	0.977
CENPI	KIF2C	9606.ENSP00000362018	9606.ENSP00000361298	0	0	0	0	0.269	0	0.9	0.416	0.953
CENPI	HIST1H2BL	9606.ENSP00000362018	9606.ENSP00000366618	0	0	0	0	0.069	0	0.9	0	0.902
CENPI	HIST1H2BH	9606.ENSP00000362018	9606.ENSP00000479169	0	0	0	0	0.065	0	0.9	0.048	0.903
CENPI	ZWINT	9606.ENSP00000362018	9606.ENSP00000363055	0	0	0	0	0.162	0	0.9	0.568	0.96
CENPI	SPC24	9606.ENSP00000362018	9606.ENSP00000465075	0	0	0	0	0.249	0	0.9	0.615	0.968
CENPI	HJURP	9606.ENSP00000362018	9606.ENSP00000414109	0	0	0	0	0.296	0	0.9	0.745	0.98
CENPI	CENPK	9606.ENSP00000362018	9606.ENSP00000379911	0	0	0	0	0.228	0.443	0.9	0.89	0.994
CENPK	CENPM	9606.ENSP00000379911	9606.ENSP00000215980	0	0	0	0	0.178	0.136	0.9	0.82	0.985
CENPK	OIP5	9606.ENSP00000379911	9606.ENSP00000220514	0	0	0	0	0.364	0	0.9	0	0.933
CENPK	NDC80	9606.ENSP00000379911	9606.ENSP00000261597	0	0	0	0	0.596	0	0.9	0.441	0.975
CENPK	KIF18A	9606.ENSP00000379911	9606.ENSP00000263181	0	0	0	0	0.489	0	0.9	0.479	0.971
CENPK	SGOL1	9606.ENSP00000379911	9606.ENSP00000263753	0	0	0	0	0.287	0.114	0.9	0.299	0.949
CENPK	NUF2	9606.ENSP00000379911	9606.ENSP00000271452	0	0	0	0	0.645	0	0.9	0.445	0.978
CENPK	CENPU	9606.ENSP00000379911	9606.ENSP00000281453	0	0	0	0	0.369	0.632	0.9	0.791	0.994
CENPK	SPC25	9606.ENSP00000379911	9606.ENSP00000282074	0	0	0	0	0.416	0	0.9	0	0.939
CENPK	SKA1	9606.ENSP00000379911	9606.ENSP00000285116	0	0	0	0	0.264	0	0.9	0.357	0.948
CENPK	MAD2L1	9606.ENSP00000379911	9606.ENSP00000296509	0	0	0	0	0.696	0	0.9	0.178	0.972
CENPK	PLK1	9606.ENSP00000379911	9606.ENSP00000300093	0	0	0	0	0.284	0	0.9	0.267	0.943
CENPK	DYNC1I1	9606.ENSP00000379911	9606.ENSP00000320130	0	0	0	0	0	0	0.9	0	0.9
CENPK	ERCC6L	9606.ENSP00000379911	9606.ENSP00000334675	0	0	0	0	0.205	0	0.9	0.14	0.925
CENPK	CENPL	9606.ENSP00000379911	9606.ENSP00000348527	0	0	0	0	0.123	0	0.9	0.945	0.994
CENPK	SGOL2	9606.ENSP00000379911	9606.ENSP00000350447	0	0	0	0	0.369	0	0.9	0.076	0.936
CENPK	CENPW	9606.ENSP00000379911	9606.ENSP00000357308	0	0	0	0	0.285	0	0.9	0.738	0.979
CENPK	KIF2C	9606.ENSP00000379911	9606.ENSP00000361298	0	0	0	0	0.321	0	0.9	0.22	0.942
CENPK	ZWINT	9606.ENSP00000379911	9606.ENSP00000363055	0	0	0	0	0.28	0.164	0.9	0.441	0.961
CENPK	HIST1H2BL	9606.ENSP00000379911	9606.ENSP00000366618	0	0	0	0	0.046	0	0.9	0	0.9
CENPK	HIST1H2BH	9606.ENSP00000379911	9606.ENSP00000479169	0	0	0	0	0.065	0	0.9	0	0.902
CENPK	HJURP	9606.ENSP00000379911	9606.ENSP00000414109	0	0	0	0	0.285	0	0.9	0.514	0.962
CENPK	SPC24	9606.ENSP00000379911	9606.ENSP00000465075	0	0	0	0	0.292	0	0.9	0.528	0.963
CENPL	CENPM	9606.ENSP00000348527	9606.ENSP00000215980	0	0	0	0	0.098	0.131	0.9	0.761	0.978
CENPL	OIP5	9606.ENSP00000348527	9606.ENSP00000220514	0	0	0	0	0.113	0	0.9	0	0.907
CENPL	NDC80	9606.ENSP00000348527	9606.ENSP00000261597	0	0	0	0	0.147	0	0.9	0.366	0.941
CENPL	KIF18A	9606.ENSP00000348527	9606.ENSP00000263181	0	0	0	0	0.137	0	0.9	0.397	0.943
CENPL	SGOL1	9606.ENSP00000348527	9606.ENSP00000263753	0	0	0	0	0.103	0	0.9	0.442	0.945
CENPL	NUF2	9606.ENSP00000348527	9606.ENSP00000271452	0	0	0	0	0.171	0	0.9	0.492	0.954
CENPL	CENPU	9606.ENSP00000348527	9606.ENSP00000281453	0	0	0	0	0.1	0.131	0.9	0.766	0.979
CENPL	SPC25	9606.ENSP00000348527	9606.ENSP00000282074	0	0	0	0	0.123	0	0.9	0	0.908
CENPL	SKA1	9606.ENSP00000348527	9606.ENSP00000285116	0	0	0	0	0.135	0	0.9	0.326	0.936
CENPL	MAD2L1	9606.ENSP00000348527	9606.ENSP00000296509	0	0	0	0	0.199	0	0.9	0.065	0.918
CENPL	PLK1	9606.ENSP00000348527	9606.ENSP00000300093	0	0	0	0	0.134	0	0.9	0.196	0.924
CENPL	DYNC1I1	9606.ENSP00000348527	9606.ENSP00000320130	0	0	0	0	0	0	0.9	0	0.9
CENPL	ERCC6L	9606.ENSP00000348527	9606.ENSP00000334675	0	0	0	0	0.118	0	0.9	0	0.908
CENPL	HIST1H2BH	9606.ENSP00000348527	9606.ENSP00000479169	0	0	0	0	0	0	0.9	0	0.9
CENPL	HIST1H2BL	9606.ENSP00000348527	9606.ENSP00000366618	0	0	0	0	0	0	0.9	0	0.9
CENPL	KIF2C	9606.ENSP00000348527	9606.ENSP00000361298	0	0	0	0	0.108	0	0.9	0.304	0.932
CENPL	ZWINT	9606.ENSP00000348527	9606.ENSP00000363055	0	0	0	0	0.089	0	0.9	0.32	0.932
CENPL	SGOL2	9606.ENSP00000348527	9606.ENSP00000350447	0	0	0	0	0.117	0	0.9	0.373	0.939
CENPL	HJURP	9606.ENSP00000348527	9606.ENSP00000414109	0	0	0	0	0.105	0	0.9	0.451	0.946
CENPL	SPC24	9606.ENSP00000348527	9606.ENSP00000465075	0	0	0	0	0.152	0	0.9	0.473	0.951
CENPL	CENPW	9606.ENSP00000348527	9606.ENSP00000357308	0	0	0	0	0.093	0	0.9	0.744	0.974
CENPM	DYNC1I1	9606.ENSP00000215980	9606.ENSP00000320130	0	0	0	0	0	0	0.9	0	0.9
CENPM	HIST1H2BH	9606.ENSP00000215980	9606.ENSP00000479169	0	0	0	0	0.065	0	0.9	0	0.902
CENPM	HIST1H2BL	9606.ENSP00000215980	9606.ENSP00000366618	0	0	0	0	0.064	0	0.9	0	0.902
CENPM	SGOL2	9606.ENSP00000215980	9606.ENSP00000350447	0	0	0	0	0.143	0	0.9	0.077	0.914
CENPM	ERCC6L	9606.ENSP00000215980	9606.ENSP00000334675	0	0	0	0	0.276	0	0.9	0	0.924
CENPM	SPC25	9606.ENSP00000215980	9606.ENSP00000282074	0	0	0	0	0.355	0	0.9	0	0.932
CENPM	KIF18A	9606.ENSP00000215980	9606.ENSP00000263181	0	0	0	0	0.23	0	0.9	0.24	0.936
CENPM	SGOL1	9606.ENSP00000215980	9606.ENSP00000263753	0	0	0	0	0.232	0.111	0.9	0.212	0.939
CENPM	NUF2	9606.ENSP00000215980	9606.ENSP00000271452	0	0	0	0	0.349	0	0.9	0.252	0.947
CENPM	PLK1	9606.ENSP00000215980	9606.ENSP00000300093	0	0	0	0	0.379	0	0.9	0.237	0.948
CENPM	SKA1	9606.ENSP00000215980	9606.ENSP00000285116	0	0	0	0	0.286	0	0.9	0.4	0.953
CENPM	SPC24	9606.ENSP00000215980	9606.ENSP00000465075	0	0	0	0	0.328	0	0.9	0.421	0.957
CENPM	MAD2L1	9606.ENSP00000215980	9606.ENSP00000296509	0	0	0	0	0.614	0	0.9	0.23	0.967
CENPM	NDC80	9606.ENSP00000215980	9606.ENSP00000261597	0	0	0	0	0.611	0	0.9	0.27	0.969
CENPM	OIP5	9606.ENSP00000215980	9606.ENSP00000220514	0	0	0	0	0.771	0	0.9	0	0.976
CENPM	CENPW	9606.ENSP00000215980	9606.ENSP00000357308	0	0	0	0	0.243	0	0.9	0.734	0.978
CENPM	KIF2C	9606.ENSP00000215980	9606.ENSP00000361298	0	0	0	0	0.75	0	0.9	0.229	0.979
CENPM	ZWINT	9606.ENSP00000215980	9606.ENSP00000363055	0	0	0	0	0.682	0.136	0.9	0.473	0.983
CENPM	HJURP	9606.ENSP00000215980	9606.ENSP00000414109	0	0	0	0	0.783	0	0.9	0.481	0.987
CENPM	CENPU	9606.ENSP00000215980	9606.ENSP00000281453	0	0	0	0	0.483	0.564	0.9	0.812	0.995
CENPU	OIP5	9606.ENSP00000281453	9606.ENSP00000220514	0	0	0	0	0.783	0	0.9	0.528	0.988
CENPU	NDC80	9606.ENSP00000281453	9606.ENSP00000261597	0	0	0	0	0.787	0	0.9	0.732	0.993
CENPU	KIF18A	9606.ENSP00000281453	9606.ENSP00000263181	0	0	0	0	0.568	0	0.9	0.377	0.97
CENPU	SGOL1	9606.ENSP00000281453	9606.ENSP00000263753	0	0	0	0	0.179	0	0.9	0.409	0.947
CENPU	NUF2	9606.ENSP00000281453	9606.ENSP00000271452	0	0	0	0	0.722	0	0.9	0.355	0.98
CENPU	DYNC1I1	9606.ENSP00000281453	9606.ENSP00000320130	0	0	0	0	0	0	0.9	0	0.9
CENPU	HIST1H2BL	9606.ENSP00000281453	9606.ENSP00000366618	0	0	0	0	0.076	0	0.9	0	0.903
CENPU	HIST1H2BH	9606.ENSP00000281453	9606.ENSP00000479169	0	0	0	0	0.088	0	0.9	0	0.904
CENPU	SPC25	9606.ENSP00000281453	9606.ENSP00000282074	0	0	0	0	0.293	0	0.9	0	0.926
CENPU	SKA1	9606.ENSP00000281453	9606.ENSP00000285116	0	0	0	0	0.211	0	0.9	0.212	0.932
CENPU	SGOL2	9606.ENSP00000281453	9606.ENSP00000350447	0	0	0	0	0.283	0	0.9	0.143	0.933
CENPU	SPC24	9606.ENSP00000281453	9606.ENSP00000465075	0	0	0	0	0.16	0	0.9	0.444	0.949
CENPU	ERCC6L	9606.ENSP00000281453	9606.ENSP00000334675	0	0	0	0	0.298	0	0.9	0.389	0.953
CENPU	KIF2C	9606.ENSP00000281453	9606.ENSP00000361298	0	0	0	0	0.682	0	0.9	0.348	0.977
CENPU	HJURP	9606.ENSP00000281453	9606.ENSP00000414109	0	0	0	0	0.614	0	0.9	0.482	0.978
CENPU	CENPW	9606.ENSP00000281453	9606.ENSP00000357308	0	0	0	0	0.357	0	0.9	0.741	0.981
CENPU	MAD2L1	9606.ENSP00000281453	9606.ENSP00000296509	0	0	0	0	0.825	0	0.9	0.297	0.986
CENPU	ZWINT	9606.ENSP00000281453	9606.ENSP00000363055	0	0	0	0	0.795	0	0.9	0.481	0.988
CENPU	PLK1	9606.ENSP00000281453	9606.ENSP00000300093	0	0	0	0	0.26	0.328	0.9	0.835	0.99
CENPW	OIP5	9606.ENSP00000357308	9606.ENSP00000220514	0	0	0	0	0.397	0	0.9	0.441	0.963
CENPW	HIST1H2BL	9606.ENSP00000357308	9606.ENSP00000366618	0	0	0	0	0.067	0	0.9	0	0.902
CENPW	HIST1H2BH	9606.ENSP00000357308	9606.ENSP00000479169	0	0	0	0	0.076	0	0.9	0	0.903
CENPW	HJURP	9606.ENSP00000357308	9606.ENSP00000414109	0	0	0	0	0.318	0	0.9	0.588	0.969
CEP55	DLGAP5	9606.ENSP00000360540	9606.ENSP00000247191	0	0	0	0	0.937	0	0	0.473	0.965
CEP55	NCAPG	9606.ENSP00000360540	9606.ENSP00000251496	0	0	0	0	0.923	0	0	0.318	0.945
CEP55	KIF23	9606.ENSP00000360540	9606.ENSP00000260363	0	0	0	0	0.85	0.317	0	0.81	0.979
CEP55	KIF11	9606.ENSP00000360540	9606.ENSP00000260731	0	0	0	0	0.957	0.085	0	0.428	0.975
CEP55	NDC80	9606.ENSP00000360540	9606.ENSP00000261597	0	0	0	0	0.91	0	0	0.268	0.932
CEP55	NUF2	9606.ENSP00000360540	9606.ENSP00000271452	0	0	0	0	0.832	0	0	0.496	0.912
CEP55	MELK	9606.ENSP00000360540	9606.ENSP00000298048	0	0	0	0	0.909	0	0	0.389	0.942
CEP55	PLK1	9606.ENSP00000360540	9606.ENSP00000300093	0	0	0	0	0.652	0.305	0	0.801	0.947
CEP55	KIF15	9606.ENSP00000360540	9606.ENSP00000324020	0	0	0	0	0.892	0.085	0	0.387	0.934
CEP55	FOXM1	9606.ENSP00000360540	9606.ENSP00000342307	0	0	0	0	0.826	0	0	0.671	0.94
CEP55	UBE2C	9606.ENSP00000360540	9606.ENSP00000348838	0	0	0	0	0.911	0	0	0.535	0.957
CEP55	RRM2	9606.ENSP00000360540	9606.ENSP00000353770	0	0	0	0	0.92	0	0	0.473	0.956
CEP55	NEK2	9606.ENSP00000360540	9606.ENSP00000355966	0	0	0	0	0.87	0	0	0.408	0.919
CEP55	KIF14	9606.ENSP00000360540	9606.ENSP00000356319	0	0	0	0	0.843	0.085	0	0.359	0.9
CEP55	MKI67	9606.ENSP00000360540	9606.ENSP00000357643	0	0	0	0	0.916	0	0	0.519	0.958
CEP55	TTK	9606.ENSP00000360540	9606.ENSP00000358813	0	0	0	0	0.942	0	0	0.373	0.962
CEP55	PRC1	9606.ENSP00000360540	9606.ENSP00000377793	0	0	0	0	0.836	0	0	0.442	0.904
CEP55	PTTG1	9606.ENSP00000360540	9606.ENSP00000377536	0	0	0	0	0.831	0	0	0.473	0.907
CEP55	KIF4A	9606.ENSP00000360540	9606.ENSP00000363524	0	0	0	0	0.825	0.085	0	0.508	0.914
CEP55	DEPDC1	9606.ENSP00000360540	9606.ENSP00000412292	0	0	0	0	0.86	0	0	0.454	0.92
CEP55	HMMR	9606.ENSP00000360540	9606.ENSP00000377492	0	0	0	0	0.907	0	0	0.258	0.928
CEP55	KIF2C	9606.ENSP00000360540	9606.ENSP00000361298	0	0	0	0	0.905	0.085	0	0.427	0.946
CEP55	PBK	9606.ENSP00000360540	9606.ENSP00000428489	0	0	0	0	0.924	0	0	0.45	0.956
CEP55	TOP2A	9606.ENSP00000360540	9606.ENSP00000411532	0	0	0	0	0.937	0	0	0.439	0.963
CEP55	RACGAP1	9606.ENSP00000360540	9606.ENSP00000404190	0	0	0	0	0.858	0.268	0	0.701	0.966
CEP55	KIF20A	9606.ENSP00000360540	9606.ENSP00000378356	0	0	0	0	0.915	0.177	0	0.56	0.966
CEP55	NUSAP1	9606.ENSP00000360540	9606.ENSP00000453403	0	0	0	0	0.957	0	0	0.474	0.976
CER1	TDGF1	9606.ENSP00000370297	9606.ENSP00000296145	0	0	0	0	0.137	0	0.9	0.456	0.948
CHGA	CHGB	9606.ENSP00000216492	9606.ENSP00000368244	0	0	0	0	0.408	0.299	0	0.873	0.943
CHGA	SCG3	9606.ENSP00000216492	9606.ENSP00000220478	0	0	0	0	0.361	0.379	0	0.951	0.979
CHGB	TMEM132A	9606.ENSP00000368244	9606.ENSP00000005286	0	0	0	0	0.061	0	0.9	0	0.902
CHGB	SCG3	9606.ENSP00000368244	9606.ENSP00000220478	0	0	0	0	0.326	0	0.9	0.72	0.979
CHGB	VGF	9606.ENSP00000368244	9606.ENSP00000249330	0	0	0	0	0.132	0	0.9	0.668	0.968
CHGB	STC2	9606.ENSP00000368244	9606.ENSP00000265087	0	0	0	0	0	0	0.9	0	0.9
CHGB	SCG2	9606.ENSP00000368244	9606.ENSP00000304133	0	0	0	0	0.296	0	0.9	0.898	0.992
CHGB	NOTUM	9606.ENSP00000368244	9606.ENSP00000387310	0	0	0	0	0	0	0.9	0	0.9
CHGB	GPC3	9606.ENSP00000368244	9606.ENSP00000377836	0	0	0	0	0	0	0.9	0	0.9
CHGB	MSLN	9606.ENSP00000368244	9606.ENSP00000372313	0	0	0	0	0	0	0.9	0	0.9
CHGB	MATN3	9606.ENSP00000368244	9606.ENSP00000383894	0	0	0	0	0	0	0.9	0.061	0.902
CHGB	MEPE	9606.ENSP00000368244	9606.ENSP00000416984	0	0	0	0	0.098	0	0.9	0	0.905
CHGB	SPP1	9606.ENSP00000368244	9606.ENSP00000378517	0	0	0	0	0	0	0.9	0.128	0.909
CHGB	SPARCL1	9606.ENSP00000368244	9606.ENSP00000414856	0	0	0	0	0.153	0	0.9	0.112	0.918
CHRM1	KISS1R	9606.ENSP00000306490	9606.ENSP00000234371	0	0	0	0.568	0.063	0	0.9	0.068	0.903
CHRM1	F2RL3	9606.ENSP00000306490	9606.ENSP00000248076	0	0	0	0	0	0	0.9	0	0.9
CHRM1	GNGT1	9606.ENSP00000306490	9606.ENSP00000248572	0	0	0	0	0.061	0	0.9	0.042	0.902
CHRM1	NTS	9606.ENSP00000306490	9606.ENSP00000256010	0	0	0	0	0.063	0	0.9	0.118	0.91
CHRM1	GRP	9606.ENSP00000306490	9606.ENSP00000256857	0	0	0	0	0.085	0	0.9	0.093	0.909
CHRM1	CHRNA1	9606.ENSP00000306490	9606.ENSP00000261007	0	0	0	0	0	0	0.9	0.229	0.919
CHRM1	PROK1	9606.ENSP00000306490	9606.ENSP00000271331	0	0	0	0	0	0	0.9	0.049	0.9
CHRM1	HTR2C	9606.ENSP00000306490	9606.ENSP00000276198	0	0	0	0.664	0.158	0	0.9	0.337	0.921
CHRM1	TACR1	9606.ENSP00000306490	9606.ENSP00000303522	0	0	0	0.579	0.079	0	0.9	0.297	0.914
CHRM1	NTSR2	9606.ENSP00000306490	9606.ENSP00000303686	0	0	0	0	0.495	0	0.9	0.125	0.952
CHRM1	GRM5	9606.ENSP00000306490	9606.ENSP00000306138	0	0	0	0	0.352	0	0.9	0.313	0.951
CHRM1	LAMA3	9606.ENSP00000306490	9606.ENSP00000324532	0	0	0	0	0	0	0.9	0.048	0.9
CHRM1	NMB	9606.ENSP00000306490	9606.ENSP00000378089	0	0	0	0	0	0	0.9	0	0.9
CHRM1	LPAR4	9606.ENSP00000306490	9606.ENSP00000408205	0	0	0	0	0	0	0.9	0	0.9
CHRM1	UTS2R	9606.ENSP00000306490	9606.ENSP00000323516	0	0	0	0.566	0	0	0.9	0	0.9
CHRM1	QRFPR	9606.ENSP00000306490	9606.ENSP00000377948	0	0	0	0.575	0	0	0.9	0.05	0.9
CHRM1	PTGFR	9606.ENSP00000306490	9606.ENSP00000359793	0	0	0	0	0	0	0.9	0.055	0.901
CHRM1	GNG4	9606.ENSP00000306490	9606.ENSP00000375727	0	0	0	0	0.062	0	0.9	0	0.902
CHRM1	NPFFR2	9606.ENSP00000306490	9606.ENSP00000307822	0	0	0	0.567	0.061	0	0.9	0.071	0.903
CHRM1	MLN	9606.ENSP00000306490	9606.ENSP00000388825	0	0	0	0	0	0	0.9	0.073	0.903
CHRM1	EDN3	9606.ENSP00000306490	9606.ENSP00000337128	0	0	0	0	0.088	0	0.9	0	0.904
CHRM1	GRPR	9606.ENSP00000306490	9606.ENSP00000369643	0	0	0	0.569	0.062	0	0.9	0.124	0.905
CHRM1	PAK3	9606.ENSP00000306490	9606.ENSP00000353864	0	0	0	0	0.098	0	0.9	0	0.905
CHRM1	LPAR3	9606.ENSP00000306490	9606.ENSP00000395389	0	0	0	0	0	0	0.9	0.099	0.906
CHRM1	GPRC6A	9606.ENSP00000306490	9606.ENSP00000309493	0	0	0	0	0	0	0.9	0.127	0.908
CHRM1	TAC3	9606.ENSP00000306490	9606.ENSP00000483110	0	0	0	0	0.088	0	0.9	0.087	0.909
CHRM1	GCG	9606.ENSP00000306490	9606.ENSP00000387662	0	0	0	0	0	0	0.9	0.196	0.916
CHRM1	GAST	9606.ENSP00000306490	9606.ENSP00000331358	0	0	0	0	0.051	0	0.9	0.19	0.916
CHRM1	OPN4	9606.ENSP00000306490	9606.ENSP00000361141	0	0	0	0.572	0.154	0	0.9	0.211	0.918
CHRNA1	GNGT1	9606.ENSP00000261007	9606.ENSP00000248572	0	0	0	0	0	0	0.9	0	0.9
CHRNA1	CHRND	9606.ENSP00000261007	9606.ENSP00000258385	0	0	0	0.851	0.113	0.81	0.54	0.92	0.927
CHRNA1	LAMA3	9606.ENSP00000261007	9606.ENSP00000324532	0	0	0	0	0	0	0.9	0	0.9
CHRNA1	PAK3	9606.ENSP00000261007	9606.ENSP00000353864	0	0	0	0	0	0	0.9	0	0.9
CHRNA1	CHRNA3	9606.ENSP00000261007	9606.ENSP00000315602	0	0	0	0.928	0	0	0.9	0.649	0.904
CHRNA1	CHRNB2	9606.ENSP00000261007	9606.ENSP00000357461	0	0	0	0.9	0	0	0.9	0.563	0.905
CHRNA1	CHRNB3	9606.ENSP00000261007	9606.ENSP00000289957	0	0	0	0.906	0	0	0.9	0.6	0.905
CHRNA3	CHRND	9606.ENSP00000315602	9606.ENSP00000258385	0	0	0	0.878	0	0	0.9	0.581	0.906
CHRNA3	CHRNB3	9606.ENSP00000315602	9606.ENSP00000289957	0	0	0	0.93	0.063	0	0.9	0.843	0.908
CHRNA3	CHRNB2	9606.ENSP00000315602	9606.ENSP00000357461	0	0	0	0.926	0.062	0.551	0.9	0.806	0.956
CHRNB2	CHRND	9606.ENSP00000357461	9606.ENSP00000258385	0	0	0	0.903	0	0	0.9	0.573	0.905
CHRNB2	CHRNB3	9606.ENSP00000357461	9606.ENSP00000289957	0	0	0	0.914	0.085	0	0.9	0.801	0.911
CKAP2L	ECT2	9606.ENSP00000305204	9606.ENSP00000376457	0	0	0	0	0.853	0	0	0.353	0.901
CKB	MYH7B	9606.ENSP00000299198	9606.ENSP00000262873	0	0	0	0	0.063	0.908	0	0.074	0.913
CKMT1A	CKMT1B	9606.ENSP00000406577	9606.ENSP00000300283	0	0	0.449	0.987	0.769	0.8	0	0.711	0.952
CLDN18	CLDN19	9606.ENSP00000183605	9606.ENSP00000296387	0	0	0	0.864	0	0.379	0.9	0.498	0.939
CLPS	PNLIP	9606.ENSP00000259938	9606.ENSP00000358223	0	0	0	0	0.347	0.619	0.9	0.905	0.997
CLSPN	ORC6	9606.ENSP00000312995	9606.ENSP00000219097	0	0	0	0	0.203	0	0.9	0.194	0.93
CLSPN	MCM2	9606.ENSP00000312995	9606.ENSP00000265056	0	0	0	0	0.57	0	0.9	0.526	0.977
CLSPN	PLK1	9606.ENSP00000312995	9606.ENSP00000300093	0	0	0	0	0.411	0.379	0.9	0.877	0.994
CLSPN	ORC1	9606.ENSP00000312995	9606.ENSP00000360623	0	0	0	0	0.648	0	0.9	0.119	0.966
CLSPN	MCM10	9606.ENSP00000312995	9606.ENSP00000418268	0	0	0	0	0.624	0	0.9	0.522	0.98
CLSPN	EXO1	9606.ENSP00000312995	9606.ENSP00000355506	0	0	0	0	0.68	0	0.9	0.517	0.983
CNGB1	GUCY2D	9606.ENSP00000251102	9606.ENSP00000254854	0	0	0	0	0.062	0.799	0	0.558	0.909
CNGB1	RHO	9606.ENSP00000251102	9606.ENSP00000296271	0	0	0	0	0.061	0	0.9	0.628	0.962
CNGB3	GUCY2D	9606.ENSP00000316605	9606.ENSP00000254854	0	0	0	0	0.061	0.72	0	0.651	0.9
CNNM1	HPSE2	9606.ENSP00000349147	9606.ENSP00000359583	0	0	0	0	0.063	0	0	0.928	0.929
CNR1	DRD4	9606.ENSP00000358513	9606.ENSP00000176183	0	0	0	0	0	0	0.9	0.669	0.965
CNR1	GNGT1	9606.ENSP00000358513	9606.ENSP00000248572	0	0	0	0	0	0.165	0.9	0	0.912
CNR1	MTNR1B	9606.ENSP00000358513	9606.ENSP00000257068	0	0	0	0.579	0	0	0.9	0.189	0.906
CNR1	GABBR2	9606.ENSP00000358513	9606.ENSP00000259455	0	0	0	0	0.112	0	0.9	0.167	0.919
CNR1	OPRK1	9606.ENSP00000358513	9606.ENSP00000265572	0	0	0	0.567	0.062	0	0.9	0.84	0.937
CNR1	GAL	9606.ENSP00000358513	9606.ENSP00000265643	0	0	0	0	0	0	0.9	0.382	0.935
CNR1	SST	9606.ENSP00000358513	9606.ENSP00000287641	0	0	0	0	0.118	0	0.9	0.512	0.953
CNR1	SSTR5	9606.ENSP00000358513	9606.ENSP00000293897	0	0	0	0.579	0.061	0	0.9	0.382	0.916
CNR1	CXCL5	9606.ENSP00000358513	9606.ENSP00000296027	0	0	0	0	0	0	0.9	0.058	0.901
CNR1	HTR1F	9606.ENSP00000358513	9606.ENSP00000322924	0	0	0	0.577	0.061	0	0.9	0.165	0.907
CNR1	RXFP4	9606.ENSP00000358513	9606.ENSP00000357301	0	0	0	0	0	0	0.9	0	0.9
CNR1	RLN3	9606.ENSP00000358513	9606.ENSP00000397415	0	0	0	0	0	0	0.9	0.057	0.901
CNR1	HCAR1	9606.ENSP00000358513	9606.ENSP00000389255	0	0	0	0	0	0	0.9	0.07	0.903
CNR1	LPAR3	9606.ENSP00000358513	9606.ENSP00000395389	0	0	0	0.705	0	0	0.9	0.2	0.904
CNR1	P2RY4	9606.ENSP00000358513	9606.ENSP00000363643	0	0	0	0	0	0	0.9	0.08	0.904
CNR1	HTR1D	9606.ENSP00000358513	9606.ENSP00000363748	0	0	0	0.615	0.061	0	0.9	0.294	0.912
CNR1	PPY	9606.ENSP00000358513	9606.ENSP00000466009	0	0	0	0	0	0	0.9	0.171	0.913
CNR1	GNG4	9606.ENSP00000358513	9606.ENSP00000375727	0	0	0	0	0.063	0.165	0.9	0	0.914
CNR1	SSTR3	9606.ENSP00000358513	9606.ENSP00000480971	0	0	0	0.561	0.092	0	0.9	0.341	0.918
CNR1	HTR1B	9606.ENSP00000358513	9606.ENSP00000358963	0	0	0	0.601	0.079	0	0.9	0.441	0.92
CNR1	GRM4	9606.ENSP00000358513	9606.ENSP00000440556	0	0	0	0	0.095	0.057	0.9	0.398	0.941
COL11A1	COL22A1	9606.ENSP00000359114	9606.ENSP00000303153	0	0	0.294	0.712	0.087	0.063	0.9	0.558	0.927
COL11A1	COL7A1	9606.ENSP00000359114	9606.ENSP00000332371	0	0	0	0.682	0.062	0	0.9	0.524	0.917
COL11A1	COL9A1	9606.ENSP00000359114	9606.ENSP00000349790	0	0	0.395	0.718	0.078	0	0.9	0.747	0.931
COL11A1	COL15A1	9606.ENSP00000359114	9606.ENSP00000364140	0	0	0	0.589	0.062	0	0.9	0.535	0.922
COL11A1	COL24A1	9606.ENSP00000359114	9606.ENSP00000359603	0	0	0.273	0.761	0.062	0	0.9	0.73	0.923
COL11A1	COL4A6	9606.ENSP00000359114	9606.ENSP00000378340	0	0	0.353	0.639	0.083	0	0.9	0.362	0.925
COL11A1	COL2A1	9606.ENSP00000359114	9606.ENSP00000369889	0	0	0.43	0.853	0.257	0	0.9	0.8	0.935
COL15A1	MMP13	9606.ENSP00000364140	9606.ENSP00000260302	0	0	0	0	0.061	0	0.9	0.14	0.912
COL15A1	COL22A1	9606.ENSP00000364140	9606.ENSP00000303153	0	0	0	0.576	0.055	0	0.9	0.405	0.917
COL15A1	COL7A1	9606.ENSP00000364140	9606.ENSP00000332371	0	0	0	0.581	0.09	0	0.9	0.527	0.925
COL15A1	COL9A1	9606.ENSP00000364140	9606.ENSP00000349790	0	0	0	0.631	0.055	0	0.9	0.285	0.91
COL15A1	COL24A1	9606.ENSP00000364140	9606.ENSP00000359603	0	0	0	0.569	0.061	0	0.9	0.104	0.904
COL15A1	MMP9	9606.ENSP00000364140	9606.ENSP00000361405	0	0	0	0	0.062	0	0.9	0.163	0.914
COL15A1	CTSV	9606.ENSP00000364140	9606.ENSP00000445052	0	0	0	0	0	0	0.9	0.083	0.904
COL15A1	COL2A1	9606.ENSP00000364140	9606.ENSP00000369889	0	0	0	0.574	0.061	0	0.9	0.346	0.915
COL15A1	COL4A6	9606.ENSP00000364140	9606.ENSP00000378340	0	0	0	0.558	0.061	0	0.9	0.382	0.917
COL22A1	COL24A1	9606.ENSP00000303153	9606.ENSP00000359603	0	0	0	0.674	0.061	0.063	0.9	0.047	0.904
COL22A1	COL9A1	9606.ENSP00000303153	9606.ENSP00000349790	0	0	0	0.802	0.061	0.063	0.9	0.234	0.908
COL22A1	COL7A1	9606.ENSP00000303153	9606.ENSP00000332371	0	0	0	0.705	0.072	0.063	0.9	0.315	0.913
COL22A1	COL2A1	9606.ENSP00000303153	9606.ENSP00000369889	0	0	0	0.722	0.061	0.063	0.9	0.483	0.916
COL22A1	COL4A6	9606.ENSP00000303153	9606.ENSP00000378340	0	0	0.231	0.658	0.077	0.063	0.9	0.273	0.919
COL24A1	COL7A1	9606.ENSP00000359603	9606.ENSP00000332371	0	0	0	0.666	0	0	0.9	0.074	0.901
COL24A1	COL9A1	9606.ENSP00000359603	9606.ENSP00000349790	0	0	0.309	0.717	0.061	0	0.9	0.256	0.915
COL24A1	COL4A6	9606.ENSP00000359603	9606.ENSP00000378340	0	0	0.316	0.655	0	0	0.9	0.074	0.91
COL24A1	COL2A1	9606.ENSP00000359603	9606.ENSP00000369889	0	0	0.311	0.815	0.062	0	0.9	0.353	0.912
[truncated: 1,859 more rows]
